# Supplementary material
Source: publisher site journal article supplement (https://www.dovepress.com/article/560430)
Supplement: Supplementary file 1 [file 560430%20Supplementary%20appendix%20file.pdf]

# Supplementary Appendix

## Table of contents

|                                                                                                                    |           |
|--------------------------------------------------------------------------------------------------------------------|-----------|
| <i>Appendix 1: PRISMA-NMA checklist.....</i>                                                                       | <i>1</i>  |
| <i>Appendix 2: Search strategy.....</i>                                                                            | <i>5</i>  |
| <i>Appendix 3: Characteristics of included studies .....</i>                                                       | <i>7</i>  |
| <i>Appendix 4: Risk of bias of randomized clinical trials.....</i>                                                 | <i>10</i> |
| <i>Appendix 5: Evaluation of consistency and heterogeneity .....</i>                                               | <i>13</i> |
| <i>Appendix 6: Density plots and Trajectory plots of comparisons of each outcome.....</i>                          | <i>14</i> |
| <i>Appendix 7: Convergence Diagnostic Plots of comparisons of each outcome.....</i>                                | <i>27</i> |
| <i>Appendix 8: CINeMA Assessment .....</i>                                                                         | <i>34</i> |
| <i>Appendix 9: Funnel plots.....</i>                                                                               | <i>41</i> |
| <i>Appendix 10: Network maps and forest plots of outcomes.....</i>                                                 | <i>43</i> |
| <i>Appendix 11: SUCRA and cumulative probability plots.....</i>                                                    | <i>49</i> |
| <i>Appendix 12: league table of Summary Estimates for CPMs on CP/CPPS of 76 Trials.....</i>                        | <i>53</i> |
| <i>Appendix 13: Sensitivity analyses.....</i>                                                                      | <i>60</i> |
| <i>Appendix 14: The meta-regression of the factors that may lead to differences to the outcome indicators.....</i> | <i>61</i> |
| <i>Appendix 15: Excluded Full-Text Studies and Rationale.....</i>                                                  | <i>62</i> |

## Appendix 1: PRISMA NMA Checklist

| Section/Topic             | Item # | Checklist Item                                                                                                                                                                                                                                                                                                                                                                                                                                                                                                                                                                                                                                                                                                                                                                          | Reported on Page # |
|---------------------------|--------|-----------------------------------------------------------------------------------------------------------------------------------------------------------------------------------------------------------------------------------------------------------------------------------------------------------------------------------------------------------------------------------------------------------------------------------------------------------------------------------------------------------------------------------------------------------------------------------------------------------------------------------------------------------------------------------------------------------------------------------------------------------------------------------------|--------------------|
| <b>TITLE</b>              |        |                                                                                                                                                                                                                                                                                                                                                                                                                                                                                                                                                                                                                                                                                                                                                                                         |                    |
| Title                     | 1      | Identify the report as a systematic review <i>incorporating a network meta-analysis (or related form of meta-analysis)</i> .                                                                                                                                                                                                                                                                                                                                                                                                                                                                                                                                                                                                                                                            | 1                  |
| <b>ABSTRACT</b>           |        |                                                                                                                                                                                                                                                                                                                                                                                                                                                                                                                                                                                                                                                                                                                                                                                         |                    |
| Structured summary        | 2      | Provide a structured summary including, as applicable:<br><b>Background:</b> main objectives<br><b>Methods:</b> data sources; study eligibility criteria, participants, and interventions; study appraisal; and <i>synthesis methods, such as network meta-analysis</i> .<br><b>Results:</b> number of studies and participants identified; summary estimates with corresponding confidence/credible intervals; <i>treatment rankings may also be discussed. Authors may choose to summarize pairwise comparisons against a chosen treatment included in their analyses for brevity.</i><br><b>Discussion/Conclusions:</b> limitations; conclusions and implications of findings.<br><b>Other:</b> primary source of funding; systematic review registration number with registry name. | 2                  |
| <b>INTRODUCTION</b>       |        |                                                                                                                                                                                                                                                                                                                                                                                                                                                                                                                                                                                                                                                                                                                                                                                         |                    |
| Rationale                 | 3      | Describe the rationale for the review in the context of what is already known, <i>including mention of why a network meta-analysis has been conducted.</i> _                                                                                                                                                                                                                                                                                                                                                                                                                                                                                                                                                                                                                            | 3                  |
| Objectives                | 4      | Provide an explicit statement of questions being addressed, with reference to participants, interventions, comparisons, outcomes, and study design (PICOS).                                                                                                                                                                                                                                                                                                                                                                                                                                                                                                                                                                                                                             | 4                  |
| <b>METHODS</b>            |        |                                                                                                                                                                                                                                                                                                                                                                                                                                                                                                                                                                                                                                                                                                                                                                                         |                    |
| Protocol and registration | 5      | Indicate whether a review protocol exists and if and where it can be accessed (e.g., Web address); and, if available, provide registration information, including registration number.                                                                                                                                                                                                                                                                                                                                                                                                                                                                                                                                                                                                  | 4                  |
| Eligibility criteria      | 6      | Specify study characteristics (e.g., PICOS, length of follow-up) and report characteristics (e.g., years considered, language, publication status) used as criteria for eligibility, giving rationale. <i>Clearly describe eligible treatments included in the treatment network, and note whether any have been clustered or merged into the same node (with justification).</i> _                                                                                                                                                                                                                                                                                                                                                                                                     | 5                  |
| Information sources       | 7      | Describe all information sources (e.g., databases with dates of coverage, contact with study authors to identify additional studies) in the search and date last searched.                                                                                                                                                                                                                                                                                                                                                                                                                                                                                                                                                                                                              | 4                  |
| Search                    | 8      | Present full electronic search strategy for at least one database, including any limits used, such that it could be repeated.                                                                                                                                                                                                                                                                                                                                                                                                                                                                                                                                                                                                                                                           | 4                  |

|                                          |    |                                                                                                                                                                                                                                                                                                                                                                                                                                                    |                    |
|------------------------------------------|----|----------------------------------------------------------------------------------------------------------------------------------------------------------------------------------------------------------------------------------------------------------------------------------------------------------------------------------------------------------------------------------------------------------------------------------------------------|--------------------|
| Study selection                          | 9  | State the process for selecting studies (i.e., screening, eligibility, included in systematic review, and, if applicable, included in the meta-analysis).                                                                                                                                                                                                                                                                                          | 4                  |
| Data collection process                  | 10 | Describe method of data extraction from reports (e.g., piloted forms, independently, in duplicate) and any processes for obtaining and confirming data from investigators.                                                                                                                                                                                                                                                                         | 5                  |
| Data items                               | 11 | List and define all variables for which data were sought (e.g., PICOS, funding sources) and any assumptions and simplifications made.                                                                                                                                                                                                                                                                                                              | 5                  |
| <b>Geometry of the network</b>           | S1 | Describe methods used to explore the geometry of the treatment network under study and potential biases related to it. This should include how the evidence base has been graphically summarized for presentation, and what characteristics were compiled and used to describe the evidence base to readers.                                                                                                                                       | 6                  |
| Risk of bias within individual studies   | 12 | Describe methods used for assessing risk of bias of individual studies (including specification of whether this was done at the study or outcome level), and how this information is to be used in any data synthesis.                                                                                                                                                                                                                             | 6                  |
| Summary measures                         | 13 | State the principal summary measures (e.g., risk ratio, difference in means). <i>Also describe the use of additional summary measures assessed, such as treatment rankings and surface under the cumulative ranking curve (SUCRA) values, as well as modified approaches used to present summary findings from meta-analyses.</i>                                                                                                                  | 7                  |
| Planned methods of analysis              | 14 | Describe the methods of handling data and combining results of studies for each network meta-analysis. This should include, but not be limited to: <ul style="list-style-type: none"> <li>• <i>Handling of multi-arm trials;</i></li> <li>• <i>Selection of variance structure;</i></li> <li>• <i>Selection of prior distributions in Bayesian analyses; and</i></li> <li>• <i>Assessment of model fit.</i></li> </ul>                             | 7                  |
| <b>Assessment of Inconsistency</b>       | S2 | Describe the statistical methods used to evaluate the agreement of direct and indirect evidence in the treatment network(s) studied. Describe efforts taken to address its presence when found.                                                                                                                                                                                                                                                    | 7                  |
| Risk of bias across studies              | 15 | Specify any assessment of risk of bias that may affect the cumulative evidence (e.g., publication bias, selective reporting within studies).                                                                                                                                                                                                                                                                                                       | 6                  |
| Additional analyses                      | 16 | Describe methods of additional analyses if done, indicating which were pre-specified. This may include, but not be limited to, the following: <ul style="list-style-type: none"> <li>• Sensitivity or subgroup analyses;</li> <li>• Meta-regression analyses;</li> <li>• <i>Alternative formulations of the treatment network; and</i></li> <li>• <i>Use of alternative prior distributions for Bayesian analyses (if applicable).</i>_</li> </ul> | 7                  |
| <b>RESULTS</b>                           |    |                                                                                                                                                                                                                                                                                                                                                                                                                                                    |                    |
| Study selection                          | 17 | Give numbers of studies screened, assessed for eligibility, and included in the review, with reasons for exclusions at each stage, ideally with a flow diagram.                                                                                                                                                                                                                                                                                    | 7                  |
| <b>Presentation of network structure</b> | S3 | Provide a network graph of the included studies to enable visualization of the geometry of the treatment network.                                                                                                                                                                                                                                                                                                                                  | <i>Appendix 10</i> |
| <b>Summary of network geometry</b>       | S4 | Provide a brief overview of characteristics of the treatment network. This may include commentary on the abundance of trials and randomized                                                                                                                                                                                                                                                                                                        | <i>Appendix 10</i> |

|                                      |    |                                                                                                                                                                                                                                                                                                                                                                                                                                                              |            |
|--------------------------------------|----|--------------------------------------------------------------------------------------------------------------------------------------------------------------------------------------------------------------------------------------------------------------------------------------------------------------------------------------------------------------------------------------------------------------------------------------------------------------|------------|
|                                      |    | patients for the different interventions and pairwise comparisons in the network, gaps of evidence in the treatment network, and potential biases reflected by the network structure.                                                                                                                                                                                                                                                                        |            |
| Study characteristics                | 18 | For each study, present characteristics for which data were extracted (e.g., study size, PICOS, follow-up period) and provide the citations.                                                                                                                                                                                                                                                                                                                 | 8          |
| Risk of bias within studies          | 19 | Present data on risk of bias of each study and, if available, any outcome level assessment.                                                                                                                                                                                                                                                                                                                                                                  | 9          |
| Results of individual studies        | 20 | For all outcomes considered (benefits or harms), present, for each study: 1) simple summary data for each intervention group, and 2) effect estimates and confidence intervals. <i>Modified approaches may be needed to deal with information from larger networks.</i>                                                                                                                                                                                      | Appendix 3 |
| Synthesis of results                 | 21 | Present results of each meta-analysis done, including confidence/credible intervals. <i>In larger networks, authors may focus on comparisons versus a particular comparator (e.g. placebo or standard care), with full findings presented in an appendix. League tables and forest plots may be considered to summarize pairwise comparisons.</i> If additional summary measures were explored (such as treatment rankings), these should also be presented. | 9          |
| <b>Exploration for inconsistency</b> | S5 | Describe results from investigations of inconsistency. This may include such information as measures of model fit to compare consistency and inconsistency models, <i>P</i> values from statistical tests, or summary of inconsistency estimates from different parts of the treatment network.                                                                                                                                                              | Appendix 5 |
| Risk of bias across studies          | 22 | Present results of any assessment of risk of bias across studies for the evidence base being studied.                                                                                                                                                                                                                                                                                                                                                        | 8          |
| Results of additional analyses       | 23 | Give results of additional analyses, if done (e.g., sensitivity or subgroup analyses, meta-regression analyses, <i>alternative network geometries studied, alternative choice of prior distributions for Bayesian analyses, and so forth</i> ).                                                                                                                                                                                                              |            |
| <b>DISCUSSION</b>                    |    |                                                                                                                                                                                                                                                                                                                                                                                                                                                              |            |
| Summary of evidence                  | 24 | Summarize the main findings, including the strength of evidence for each main outcome; consider their relevance to key groups (e.g., healthcare providers, users, and policy-makers).                                                                                                                                                                                                                                                                        | 13         |
| Limitations                          | 25 | Discuss limitations at study and outcome level (e.g., risk of bias), and at review level (e.g., incomplete retrieval of identified research, reporting bias). <i>Comment on the validity of the assumptions, such as transitivity and consistency. Comment on any concerns regarding network geometry (e.g., avoidance of certain comparisons).</i>                                                                                                          | 14         |
| Conclusions                          | 26 | Provide a general interpretation of the results in the context of other evidence, and implications for future research.                                                                                                                                                                                                                                                                                                                                      | 14         |
| <b>FUNDING</b>                       |    |                                                                                                                                                                                                                                                                                                                                                                                                                                                              |            |
| Funding                              | 27 | Describe sources of funding for the systematic review and other support (e.g., supply of data); role of funders for the systematic review. This should also include information regarding whether funding has been received from manufacturers of treatments in the network and/or whether some of the authors are content experts with professional conflicts of interest that could affect use of treatments in the network.                               | 15         |

## Appendix 2: Search strategy

| # | Searches                                                                                                                                                                                                                                                                                                                                                                                                                                                                                                                                                                                                                                                                                                                                                                                                                              | Database                                              |
|---|---------------------------------------------------------------------------------------------------------------------------------------------------------------------------------------------------------------------------------------------------------------------------------------------------------------------------------------------------------------------------------------------------------------------------------------------------------------------------------------------------------------------------------------------------------------------------------------------------------------------------------------------------------------------------------------------------------------------------------------------------------------------------------------------------------------------------------------|-------------------------------------------------------|
| 1 | ((((((((((((Prostatitis[MeSH Terms]) OR (Prostatitides[Title/Abstract])) OR (Acute Bacterial Prostatitis[Title/Abstract])) OR (Acute Bacterial Prostatitides[Title/Abstract])) OR (Bacterial Prostatitides, Acute[Title/Abstract])) OR (Bacterial Prostatitis, Acute[Title/Abstract])) OR (Chronic Bacterial Prostatitis[Title/Abstract])) OR (Bacterial Prostatitides, Chronic[Title/Abstract])) OR (Bacterial Prostatitis, Chronic[Title/Abstract])) OR (Chronic Bacterial Prostatitides[Title/Abstract])) OR (Prostatitides, Chronic Bacterial[Title/Abstract])) OR (Chronic Prostatitis with Chronic Pelvic Pain Syndrome[Title/Abstract])) OR (Asymptomatic Inflammatory Prostatitis[Title/Abstract])) OR (Asymptomatic Inflammatory Prostatitides[Title/Abstract])) OR (Inflammatory Prostatitis, Asymptomatic[Title/Abstract]) | <b>Pubmed</b>                                         |
| 2 | traditional Chinese medicine[Title/Abstract]                                                                                                                                                                                                                                                                                                                                                                                                                                                                                                                                                                                                                                                                                                                                                                                          |                                                       |
| 3 | Chinese patent medicine[Title/Abstract]                                                                                                                                                                                                                                                                                                                                                                                                                                                                                                                                                                                                                                                                                                                                                                                               |                                                       |
| 4 | proprietary Chinese medicine[Title/Abstract]                                                                                                                                                                                                                                                                                                                                                                                                                                                                                                                                                                                                                                                                                                                                                                                          |                                                       |
| 5 | ((tablet[Title/Abstract]) OR (capsule[Title/Abstract])) OR (granule[Title/Abstract])                                                                                                                                                                                                                                                                                                                                                                                                                                                                                                                                                                                                                                                                                                                                                  |                                                       |
| 6 | #2 OR #3 OR #4 OR #5                                                                                                                                                                                                                                                                                                                                                                                                                                                                                                                                                                                                                                                                                                                                                                                                                  |                                                       |
| 7 | (((Randomized Controlled Trials as Topic[MeSH Terms]) OR (Clinical Trials, Randomized[Title/Abstract])) OR (Trials, Randomized Clinical[Title/Abstract])) OR (Controlled Clinical Trials, Randomized[Title/Abstract])) OR (RCT[Title/Abstract])                                                                                                                                                                                                                                                                                                                                                                                                                                                                                                                                                                                       |                                                       |
| 8 | #1 AND #6 AND #7                                                                                                                                                                                                                                                                                                                                                                                                                                                                                                                                                                                                                                                                                                                                                                                                                      |                                                       |
| 1 | TS=("Prostatitis" OR "Prostatitides" OR "Acute Bacterial Prostatitis" OR "Acute Bacterial Prostatitides" OR "Bacterial Prostatitides, Acute" OR "Bacterial Prostatitis, Acute" OR "Chronic Bacterial Prostatitis" OR "Bacterial Prostatitides, Chronic" OR "Bacterial Prostatitis, Chronic" OR "Chronic Bacterial Prostatitides" OR "Prostatitides, Chronic Bacterial" OR "Chronic Prostatitis with Chronic Pelvic Pain Syndrome" OR "Asymptomatic Inflammatory Prostatitis" OR "Asymptomatic Inflammatory Prostatitides" OR "Inflammatory Prostatitis, Asymptomatic")                                                                                                                                                                                                                                                                | <b>Web of Science</b>                                 |
| 2 | TS=("traditional Chinese medicine")                                                                                                                                                                                                                                                                                                                                                                                                                                                                                                                                                                                                                                                                                                                                                                                                   |                                                       |
| 3 | TS=("Chinese patent medicine")                                                                                                                                                                                                                                                                                                                                                                                                                                                                                                                                                                                                                                                                                                                                                                                                        |                                                       |
| 4 | TS=("proprietary Chinese medicine")                                                                                                                                                                                                                                                                                                                                                                                                                                                                                                                                                                                                                                                                                                                                                                                                   |                                                       |
| 5 | TS=("tablet" OR "capsule" OR "granule")                                                                                                                                                                                                                                                                                                                                                                                                                                                                                                                                                                                                                                                                                                                                                                                               |                                                       |
| 6 | #2 OR #3 OR #4 OR #5                                                                                                                                                                                                                                                                                                                                                                                                                                                                                                                                                                                                                                                                                                                                                                                                                  |                                                       |
| 7 | TS=("Randomized Controlled Trials as Topic" OR "Clinical Trials, Randomized" OR "Trials, Randomized Clinical" OR "Controlled Clinical Trials, Randomized" OR "RCT")                                                                                                                                                                                                                                                                                                                                                                                                                                                                                                                                                                                                                                                                   |                                                       |
| 8 | #1 AND #6 AND #7                                                                                                                                                                                                                                                                                                                                                                                                                                                                                                                                                                                                                                                                                                                                                                                                                      |                                                       |
| 1 | [mh "Prostatitis"] OR [tiab "Prostatitides"] OR [tiab "Acute Bacterial Prostatitis"] OR [tiab "Acute Bacterial Prostatitides"] OR [tiab "Bacterial Prostatitides, Acute"] OR [tiab "Bacterial Prostatitis, Acute"] OR [tiab "Chronic Bacterial Prostatitis"] OR [tiab "Bacterial Prostatitides, Chronic"] OR [tiab "Bacterial Prostatitis, Chronic"] OR [tiab "Chronic Bacterial Prostatitides"] OR [tiab "Prostatitides, Chronic Bacterial"] OR [tiab "Chronic Prostatitis with Chronic Pelvic Pain Syndrome"] OR [tiab                                                                                                                                                                                                                                                                                                              | <b>Cochrane Central Register of Controlled Trials</b> |

| # | Searches                                                                                                                                                                                                                                                                                                                                                                                                                                                                                                                                                                                                                                                  | Database                                   |
|---|-----------------------------------------------------------------------------------------------------------------------------------------------------------------------------------------------------------------------------------------------------------------------------------------------------------------------------------------------------------------------------------------------------------------------------------------------------------------------------------------------------------------------------------------------------------------------------------------------------------------------------------------------------------|--------------------------------------------|
|   | "Asymptomatic Inflammatory Prostatitis"] OR [tiab "Asymptomatic Inflammatory Prostatitides"] OR [tiab "Inflammatory Prostatitis, Asymptomatic"]                                                                                                                                                                                                                                                                                                                                                                                                                                                                                                           |                                            |
| 2 | [tiab "traditional Chinese medicine"]                                                                                                                                                                                                                                                                                                                                                                                                                                                                                                                                                                                                                     |                                            |
| 3 | [tiab "Chinese patent medicine"]                                                                                                                                                                                                                                                                                                                                                                                                                                                                                                                                                                                                                          |                                            |
| 4 | [tiab "proprietary Chinese medicine"]                                                                                                                                                                                                                                                                                                                                                                                                                                                                                                                                                                                                                     |                                            |
| 5 | [tiab "tablet"] OR [tiab "capsule"] OR [tiab "granule"]                                                                                                                                                                                                                                                                                                                                                                                                                                                                                                                                                                                                   |                                            |
| 6 | #2 OR #3 OR #4 OR #5                                                                                                                                                                                                                                                                                                                                                                                                                                                                                                                                                                                                                                      |                                            |
| 7 | [mh "Randomized Controlled Trials as Topic"] OR [tiab "Clinical Trials, Randomized"] OR [tiab "Trials, Randomized Clinical"] OR [tiab "Controlled Clinical Trials, Randomized"] OR [tiab "RCT"]                                                                                                                                                                                                                                                                                                                                                                                                                                                           |                                            |
| 8 | #1 AND #6 AND #7                                                                                                                                                                                                                                                                                                                                                                                                                                                                                                                                                                                                                                          |                                            |
| 1 | 'prostatitis'/exp OR 'prostatitides':ti,ab OR 'acute bacterial prostatitis':ti,ab OR 'acute bacterial prostatitides':ti,ab OR 'bacterial prostatitides, acute':ti,ab OR 'bacterial prostatitis, acute':ti,ab OR 'chronic bacterial prostatitis':ti,ab OR 'bacterial prostatitides, chronic':ti,ab OR 'bacterial prostatitis, chronic':ti,ab OR 'chronic bacterial prostatitides':ti,ab OR 'prostatitides, chronic bacterial':ti,ab OR 'chronic prostatitis with chronic pelvic pain syndrome':ti,ab OR 'asymptomatic inflammatory prostatitis':ti,ab OR 'asymptomatic inflammatory prostatitides':ti,ab OR 'inflammatory prostatitis, asymptomatic':ti,ab |                                            |
| 2 | 'traditional chinese medicine':ti,ab                                                                                                                                                                                                                                                                                                                                                                                                                                                                                                                                                                                                                      | <b>Embase</b>                              |
| 3 | 'chinese patent medicine':ti,ab                                                                                                                                                                                                                                                                                                                                                                                                                                                                                                                                                                                                                           |                                            |
| 4 | 'proprietary chinese medicine':ti,ab                                                                                                                                                                                                                                                                                                                                                                                                                                                                                                                                                                                                                      |                                            |
| 5 | (tablet:ti,ab OR capsule:ti,ab OR granule:ti,ab)                                                                                                                                                                                                                                                                                                                                                                                                                                                                                                                                                                                                          |                                            |
| 6 | #2 OR #3 OR #4 OR #5                                                                                                                                                                                                                                                                                                                                                                                                                                                                                                                                                                                                                                      |                                            |
| 7 | 'randomized controlled trial'/exp OR 'clinical trial, randomized':ti,ab OR 'trials, randomized clinical':ti,ab OR 'controlled clinical trials, randomized':ti,ab OR 'rct':ti,ab                                                                                                                                                                                                                                                                                                                                                                                                                                                                           |                                            |
| 8 | #1 AND #6 AND #7                                                                                                                                                                                                                                                                                                                                                                                                                                                                                                                                                                                                                                          |                                            |
| 1 | prostatitis                                                                                                                                                                                                                                                                                                                                                                                                                                                                                                                                                                                                                                               |                                            |
| 2 | traditional chinese medicine                                                                                                                                                                                                                                                                                                                                                                                                                                                                                                                                                                                                                              |                                            |
| 3 | chinese patent medicine                                                                                                                                                                                                                                                                                                                                                                                                                                                                                                                                                                                                                                   |                                            |
| 4 | proprietary chinese medicine                                                                                                                                                                                                                                                                                                                                                                                                                                                                                                                                                                                                                              |                                            |
| 5 | tablet OR capsule OR granule                                                                                                                                                                                                                                                                                                                                                                                                                                                                                                                                                                                                                              |                                            |
| 6 | #2 OR #3 OR #4 OR #5                                                                                                                                                                                                                                                                                                                                                                                                                                                                                                                                                                                                                                      |                                            |
| 7 | randomized controlled trial                                                                                                                                                                                                                                                                                                                                                                                                                                                                                                                                                                                                                               |                                            |
| 8 | #1 AND #6 AND #7                                                                                                                                                                                                                                                                                                                                                                                                                                                                                                                                                                                                                                          | <b>CNKI, VIP,<br/>Wanfang,<br/>Sinomed</b> |

## Appendix 3: Characteristics of included studies

### 1. Baseline characteristics of included studies

| Study            | Patients<br>(T/C) | Age (years)<br>(T/C)  | Duration (year)<br>(T/C) | Treatment<br>duration | T | C | Outcome |
|------------------|-------------------|-----------------------|--------------------------|-----------------------|---|---|---------|
| Wang 2023 [17]   | 50/50             | 31.02±3.46/31.46±3.98 | 3.14±0.70/3.02±0.78      | 12 weeks              | A | M | ①⑤⑦     |
| Zhang 2023 [18]  | 43/43             | 41.62±3.37/40.27±3.18 | 4.29±1.48/4.07±1.26      | 3 weeks               | A | M | ①⑤⑥⑦    |
| Qi 2023 [19]     | 30/30             | 50.34±7.44/50.22±7.62 | 2.38±0.74/2.41±0.56      | 8 weeks               | A | M | ①②③④⑤⑦  |
| Liu 2022a [20]   | 55/55             | 48.12±2.45/47.99±2.51 | 5.22±1.02/5.18±1.04      | 4 weeks               | A | M | ①②③④⑦   |
| Liu 2022b [21]   | 56/56             | 50.30±8.15/50.23±8.11 | 2.54±0.64/2.51±0.62      | 8 weeks               | A | M | ①②③④⑤⑦  |
| Zhang 2021 [22]  | 30/30             | 40.49±3.67/40.52±3.54 | 5.12±0.54/5.11±0.16      | 4 weeks               | A | M | ①②③④⑤⑦  |
| Ba 2021 [23]     | 50/50             | 51.56±5.71/51.63±5.62 | 3.63±0.25/3.57±0.27      | 8 weeks               | A | M | ①⑦      |
| Wang 2021a [24]  | 45/45             | 34.8±1.1/34.9±1.0     | 2.4±0.1/2.3±0.2          | 4 weeks               | A | M | ①②③④⑦   |
| Wang 2021b [25]  | 44/43             | 37.53±5.40/38.24±5.64 | NA                       | 8 weeks               | A | M | ①⑤⑥     |
| Lu 2020 [26]     | 52/48             | 41.2±8.3/41.2±8.3     | 2.37±0.41/2.45±0.47      | 4 weeks               | A | M | ①②⑤     |
| Liu 2020 [27]    | 41/41             | 51.9±3.5/51.3±3.7     | 4.0±0.6/4.2±0.7          | 8 weeks               | A | M | ①②③     |
| Wang 2020a [28]  | 60/60             | 32.5±17/35±19         | NA                       | 4 weeks               | A | M | ①②③④    |
| Zhang 2019 [29]  | 60/60             | 34.13±6.85/34.28±6.21 | NA                       | 8 weeks               | A | M | ①②③④⑤   |
| Su 2019 [30]     | 41/41             | 38.16±3.01/36.52±2.44 | 3.46±0.41/2.34±0.89      | 4 weeks               | A | M | ①②③④⑤   |
| Jing 2019 [31]   | 48/48             | 45.1±4.8/46.3±4.5     | 3.52±0.41/3.04±0.29      | 8 weeks               | A | M | ①②③④⑥   |
| Zeng 2017 [32]   | 65/65             | 41.2±8.3/40.3±9.7     | 2.37±0.41/40.3±9.7       | 4 weeks               | A | M | ①②③④⑤⑥  |
| Wu 2017a [33]    | 43/42             | 48.72±4.72/48.73±4.74 | NA                       | 4 weeks               | A | M | ①②③④    |
| Cai 2017 [34]    | 49/49             | 42.73±6.35/44.01±5.05 | 7.94±0.85/7.59±0.72      | 4 weeks               | A | M | ①⑤⑥     |
| Yu 2016 [35]     | 50/50             | 34.6±6.8/35.9±7.1     | NA                       | 4 weeks               | A | M | ①⑤⑥     |
| Sang 2016 [36]   | 70/70             | 35.2±3.4/35.6±3.2     | 8.6±2.4/8.7±2.6          | 4 weeks               | A | M | ①⑤      |
| Chang 2015 [37]  | 50/50             | 48.7±8.9/47.9±9.0     | 7.9±4.5/7.6±4.2          | 4 weeks               | A | M | ①⑤⑦     |
| Zhang 2015a [38] | 37/36             | 35.22±4.61/35.47±4.22 | 4.36±1.11/4.17±1.06      | 8 weeks               | A | M | ①⑤⑥     |
| He 2014 [39]     | 59/62             | 34.8                  | 2.3                      | 4 weeks               | A | M | ①②③④⑤⑥  |
| Zhu 2013 [40]    | 100/80            | NA                    | NA                       | 4 weeks               | A | M | ①②③④⑦   |
| Xiao 2013 [41]   | 90/40             | 30.5±1.2              | 13.2±2.8                 | 4 weeks               | A | M | ①②③④⑤   |
| Liu 2012 [42]    | 101/97            | 33.3±5.8/34.7±5.2     | 1.5-12/2-13              | 4 weeks               | A | M | ①⑤⑥     |
| Wang 2022 [43]   | 40/40             | 67.87±4.41/67.43±5.07 | NA                       | 4 weeks               | B | M | ①⑤⑦     |
| Lin 2022 [44]    | 53/53             | 56.22±3.51/52.52±3.62 | 6.44±1.35/6.22±1.24      | 8 days                | B | M | ①②③     |
| Liu 2021 [45]    | 54/55             | 32/28                 | 6~15/5~12                | 8 weeks               | B | M | ①②③④    |
| Yi 2021 [46]     | 35/35             | 45.5±2.3/45.6±2.7     | 5.55±2.44/5.68±2.15      | 4 weeks               | B | M | ①⑤⑦     |
| Han 2021 [47]    | 47/43             | 41.38±6.45/40.89±8.66 | NA                       | 8 weeks               | B | M | ①⑤⑦     |
| Zhou 2021a [48]  | 31/31             | 45.42±11.20           | NA                       | 2 weeks               | B | M | ①⑤⑥⑦    |
| Qian 2020 [49]   | 57/57             | 43.6±1.3/44.0±1.4     | 3.86±1.23/3.79±1.16      | 3 weeks               | B | M | ①②③⑤⑥   |
| Zhao 2020 [50]   | 62/62             | 49.6±7.4/49.4±7.2     | 3.5±0.7/3.4±0.2          | 2 weeks               | B | M | ①③④⑦    |
| Peng 2019 [51]   | 80/80             | 35.39±5.37/37.05±7.03 | 2.42±1.04/2.33±0.98      | 4 weeks               | B | M | ①②③④⑤⑥  |
| Liu 2018 [52]    | 55/55             | 36.58±4.83/36.64±4.79 | 3.24±0.76/3.29±0.73      | 2 weeks               | B | M | ①②③④⑥⑦  |
| Ma 2017 [53]     | 35/35             | 42.38±5.46/42.97±5.14 | 2.18±0.45/2.24±0.51      | 4 weeks               | B | M | ①②③⑤    |
| Mei 2017 [54]    | 39/39             | 52.2±13.5/54.1±10.3   | NA                       | 4 weeks               | B | M | ①②③④⑤⑦  |
| Chen 2016 [55]   | 107/107           | 38.26±8.34/38.28±8.52 | NA                       | 2 weeks               | B | M | ①②③④⑤   |
| Su 2016 [56]     | 93/93             | 31.48±4.69/32.75±4.26 | 7.4±0.6/6.7±0.8          | 4 weeks               | B | M | ①⑤⑦     |

|                  |         |                       |                     |          |   |   |         |
|------------------|---------|-----------------------|---------------------|----------|---|---|---------|
| Zhou 2015 [57]   | 55/55   | 45.1±16.9             | NA                  | 4 weeks  | B | M | ①⑤      |
| Luo 2018 [58]    | 60/60   | 30.22±6.53/30.31±6.61 | NA                  | 8 weeks  | C | M | ①②③④⑤   |
| Li 2017 [59]     | 60/60   | 34.6±12.7/34.0±11.4   | NA                  | 8 weeks  | C | M | ①②③④    |
| Zhang 2016 [60]  | 58/58   | 36.1±13.2/34.6±12.5   | NA                  | 12 weeks | C | M | ①②③④⑦   |
| Li 2015 [61]     | 45/45   | 43.9±5.2              | 1.6±0.5             | 4 weeks  | C | M | ①⑤⑥     |
| Liu 2014a [62]   | 60/60   | 45.7±5.4/46.3±5.2     | 3.9±1.8/3.7±2.0     | 4 weeks  | C | M | ①⑤⑥     |
| Zhang 2011 [63]  | 60/60   | 30.64±8.62/31.34±9.6  | 2.42±1.93/2.38±1.85 | 4 weeks  | C | M | ①②③④⑤   |
| Sun 2008 [64]    | 73/42   | 31.6                  | 1.4                 | 4 weeks  | C | M | ①②③⑤⑥   |
| Fan 2015 [65]    | 70/68   | 29.1±7.9              | 3.5±2.8             | 12 weeks | D | M | ①②③④⑤   |
| Jiang 2009 [66]  | 90/60   | 33±1.9/34±2.1         | 26±2.5/25±2.4       | 4 weeks  | D | M | ①⑤⑥     |
| Li 2009 [67]     | 35/32   | 36.3±6.7/35.8±8.7     | NA                  | 4 weeks  | D | M | ①②③④⑤⑥⑦ |
| Wu 2017b [68]    | 58/58   | 37.9±9.1/38.6±9.2     | 2.2±0.7/2.1±0.6     | 4 weeks  | E | M | ①③④⑦    |
| Qiao 2013 [69]   | 138/105 | 19-44                 | NA                  | 4 weeks  | E | M | ②③④⑤⑥   |
| Qiao 2012 [70]   | 60/60   | 31.4                  | 3~11                | 4 weeks  | E | M | ①②③④⑤⑥  |
| Ji 2010 [71]     | 138/130 | 33.5                  | 6                   | 4 weeks  | E | M | ①⑥      |
| Xu 2010 [72]     | 38/35   | 30.6±8.2/30.5±8.3     | 3.4±2.5/3.3±2.4     | 4 weeks  | E | M | ①②③④⑤⑥  |
| Cao 2023 [73]    | 40/40   | 35.13±10.6/35.13±10.2 | NA                  | 4 weeks  | F | M | ①③④⑥⑦   |
| Wang 2018 [74]   | 32/32   | 31.1±0.1/30.3±0.2     | NA                  | 4 weeks  | F | M | ①⑤⑥     |
| Luo 2022 [75]    | 39/39   | 55.14±1.02/54.25±1.13 | NA                  | 4 weeks  | F | M | ①⑤⑥     |
| Liu 2014b [76]   | 30/30   | 32.65/33.1            | 3.45/13.45          | 4 weeks  | F | M | ①⑤⑥     |
| Qin 2009 [77]    | 56/40   | 32.1                  | 3 - 11              | 4 weeks  | F | M | ①②③④⑤   |
| Sun 2021 [78]    | 51/51   | 35.89±6.10/35.10±6.37 | 9.36±2.07/9.10±2.21 | 4 weeks  | G | M | ①②③⑤⑦   |
| Nan 2021 [79]    | 60/60   | 47.88±4.56/47.13±4.02 | 6.83±1.20/6.56±1.32 | 4 weeks  | G | M | ①⑤⑥     |
| Wang 2020b [80]  | 51/51   | 45.77±5.45/45.90±5.23 | NA                  | 2 weeks  | G | M | ①②③④⑦   |
| Xu 2018 [81]     | 38/38   | 34.06±6.21/33.93±6.45 | 7.45±1.36/7.58±1.31 | 4 weeks  | G | M | ①②③④⑤⑦  |
| Zheng 2015 [82]  | 120/120 | 32±4.7                | 0.5±0.3             | 4 weeks  | H | M | ①⑥      |
| Zhu 2011 [83]    | 42/42   | 31.4/30.8             | 3.8/3.5             | 4 weeks  | H | M | ①②③④    |
| Wu 2014 [84]     | 53/54   | 35.3±8.4/36.1±8.7     | 21.3±6.4/21.6±6.2   | 4 weeks  | I | M | ①⑤⑥     |
| Zhu 2014 [85]    | 55/55   | 34.17±8.59/34.62±9.17 | 9.52±3.16/9.12±2.93 | 8 weeks  | I | M | ①②③④⑤   |
| Cheng 2016 [86]  | 50/50   | 41.82±5.78/42.79±5.13 | 2.10±0.54/1.91±0.42 | 8 weeks  | I | M | ①②③④⑤   |
| Zhang 2015b [87] | 40/40   | 34.65±7.3/34.60±7.8   | NA                  | 4 weeks  | J | M | ①②③④⑤   |
| Xu 2014 [88]     | 40/40   | 32±7                  | 5.3±2.1             | 4 weeks  | J | M | ②③④⑤    |
| Lin 2015 [89]    | 66/66   | 35.4±4.3/34.2±4.7     | NA                  | 4 weeks  | K | M | ①⑤⑦     |
| Hao 2012 [90]    | 56/55   | 28±10.3               | 9.1±5.6             | 4 weeks  | K | M | ①⑤      |
| Zhou 2021b [91]  | 45/45   | 27.4±4.1/28.2±3.6     | NA                  | 4 weeks  | L | M | ②③④⑤    |
| Zhu 2016 [92]    | 50/50   | 35.4±12.5/38.4±13.2   | 4.2±2.3/4.5±2.3     | 12 weeks | L | M | ①⑤⑥     |

Abbreviations: T, Treatment group; C, Control group; A: Qianlie Shutong Capsules(QLST); B: Ningmitai Capsules(NMT); C: Qianlie Antong Tablets/Capsules(QLAT); D: Sanjin Tablets(SJ); E: Qianlie Jiedu Capsules(QLJD); F: Qianlie Beixi Capsules(QLBX); G: Relinqing Granules(RLQ); H: Qianlie Tongyu Capsules(QLTY); I: Qianlieping Capsules(QLP); J: Qianlie Anshuan Tablets(QLAS); K: Wenglitong Capsules(WLT); L: Shuangshi Tonglin Capsules(SSTL); M: Standard treatment. ① total effective rate; ② Pain symptom score; ③ Urination disorder score; ④ Quality of life score; ⑤ NIH-CPSI score; ⑥ EPS white blood cell count; ⑦ Adverse events.

## 2. Chinese patent medicine list

| Medicine Name                     | Syndrome Type                                        | Efficacy                                                                                                   | Indications                                                                                                 | Composition                                                                                                         |
|-----------------------------------|------------------------------------------------------|------------------------------------------------------------------------------------------------------------|-------------------------------------------------------------------------------------------------------------|---------------------------------------------------------------------------------------------------------------------|
| <b>Qianlie Shutong Capsules</b>   | Damp-Heat with Blood Stasis                          | Clear Heat and Drain Dampness, Transform Stasis and Dissipate Nodules                                      | Chronic prostatitis, prostatic hyperplasia                                                                  | Phellodendron, Red Peony Root, Angelica Sinensis, Ligusticum Chuanxiong, Smilax Glabra, Sparganium, Alisma, etc.    |
| <b>Ningmitai Capsules</b>         | Accumulation of Damp-Heat                            | Clear Heat and Detoxify, Drain Dampness and Promote Urination                                              | Difficult urination, dribbling painful urination, lower urinary tract infections, chronic prostatitis, etc. | Red Sage, Imperata Rhizome, Large Wind Vine, Three Needles, Herba Agrimoniae, etc.                                  |
| <b>Qianlie Antong Capsules</b>    | Damp-Heat with Blood Stasis                          | Clear Heat and Drain Dampness, Invigorate Blood and Transform Stasis                                       | Frequent urination, urgent urination, difficult urination, lower abdominal distension and pain, etc.        | Phellodendron, Red Peony Root, Salvia Miltiorrhiza, Peach Kernel, Lycopus, etc.                                     |
| <b>Sanjin Tablets</b>             | Damp-Heat in the Lower Burner                        | Clear Heat and Detoxify, Drain Dampness and Promote Urination, Tonify the Kidneys                          | Heat stranguria, acute and chronic pyelonephritis, chronic non-bacterial prostatitis, etc.                  | Rosa Laevigata Root, Clinacanthus, Smilax China, Centella Asiatica, Rhizoma Smilacis Glabrae                        |
| <b>Qianlie Jiedu Capsules</b>     | Damp-Heat with Blood Stasis                          | Detoxify and Drain Dampness, Promote Urination and Transform Stasis                                        | Chronic prostatitis, etc.                                                                                   | Leech, Rhubarb, Motherwort, Dandelion, Safflower, Earthworm, Astragalus, Angelica Sinensis, etc.                    |
| <b>Qianlie Beixi Capsules</b>     | Damp-Heat with Blood Stasis                          | Clear Heat and Drain Dampness, Invigorate Blood and Transform Stasis, Promote Diuresis and Urination       | Difficult urination, dribbling painful urination, prostatitis, prostatic hyperplasia, etc.                  | Laggera Pterodonta, Mole Cricket, Vaccaria, Gleditsia Spine, Hedgehog Skin                                          |
| <b>Relinqing Granules</b>         | Damp-Heat in the Lower Burner                        | Clear Heat and Drain Fire, Promote Diuresis and Urination                                                  | Heat stranguria, urinary tract infections, pyelonephritis, etc.                                             | Persicaria Capitata                                                                                                 |
| <b>Qianlie Tongyu Capsules</b>    | Blood Stasis with Internal Accumulation of Damp-Heat | Invigorate Blood and Transform Stasis, Clear Heat and Promote Urination                                    | Chronic prostatitis, etc.                                                                                   | Red Peony Root, Eupolyphaga, Pangolin, Peach Kernel, Pyrrrosia, Prunella, Angelica Dahurica, etc.                   |
| <b>Qianlieping Capsules</b>       | Damp-Heat with Blood Stasis                          | Clear Heat and Drain Dampness, Transform Stasis and Relieve Pain                                           | Acute and chronic prostatitis                                                                               | Patrinia, Salvia Miltiorrhiza, Red Peony Root, Peach Kernel, Safflower, Lycopus, Pyrrrosia, etc.                    |
| <b>Qianlie Anshuan Tablets</b>    | Damp-Heat with Blood Stasis                          | Clear Heat and Drain Dampness to Promote Urination, Transform Stasis and Dissipate Nodules to Relieve Pain | Seminal turbidity, leukorrhea, chronic prostatitis, etc.                                                    | Phellodendron, Japanese Knotweed, Gardenia, Rhubarb, Lycopus, Ilex, Evodia, etc.                                    |
| <b>Wenglitong Capsules</b>        | Damp-Heat with Blood Stasis                          | Clear Heat and Drain Dampness, Dissipate Nodules and Dispel Stasis                                         | Prostatic hyperplasia, frequent urination, urgent urination, thin urine stream, etc.                        | Coix Seed, Zhejiang Fritillary Bulb, Clematis Armandii, Gardenia, Honeysuckle, Inula Flower, Lycopus, Rhubarb, etc. |
| <b>Shuangshi Tonglin Capsules</b> | Damp-Heat with Blood Stasis                          | Clear Heat and Drain Dampness, Transform Turbidity and Promote Urination                                   | Chronic prostatitis, etc.                                                                                   | Phellodendron, Dioscorea Hypoglauca, Patrinia, Indigo Naturalis, Talcum, Plantain Seed, Acorus, Poria, etc.         |

## Appendix 4: Risk of bias of randomized clinical trials

1. Overall risk of bias presented as percentage of each risk of bias item across all included studies.

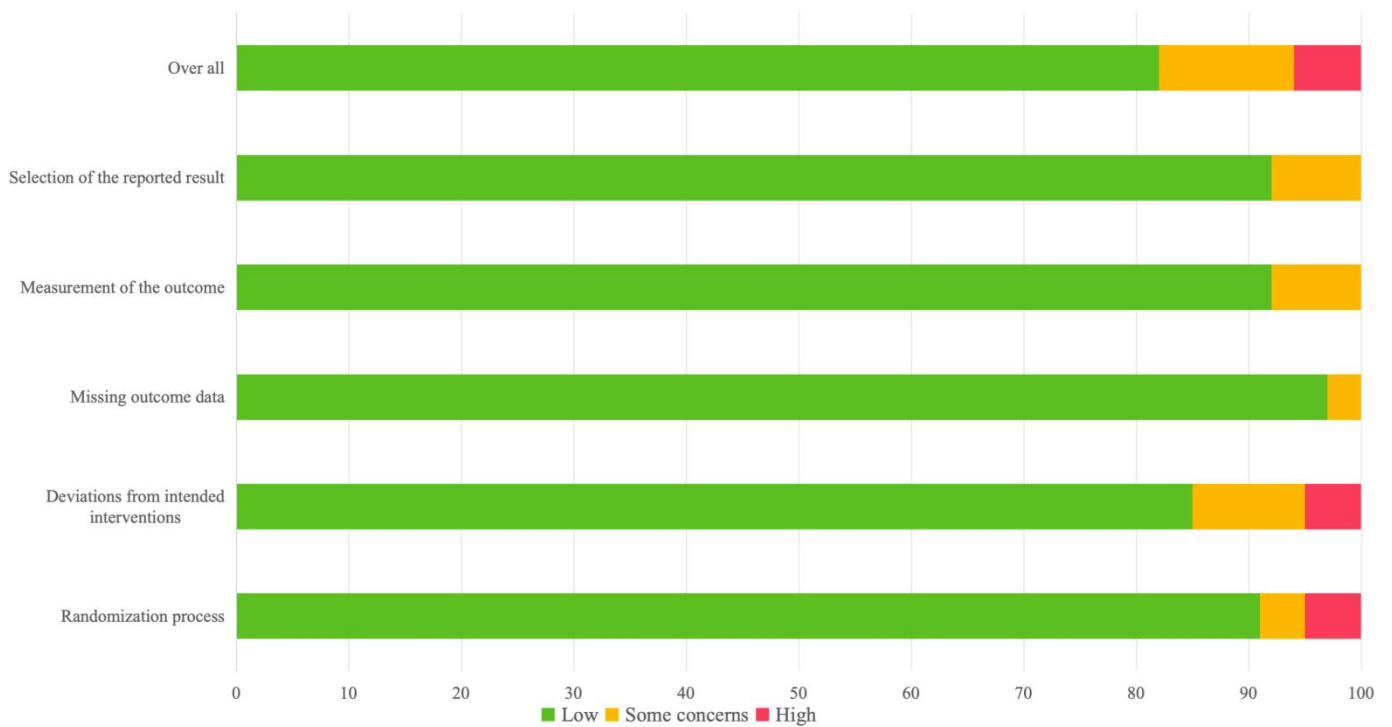

## 2. Study level risk of bias assessment using Cochrane risk of bias tool 2.0 for assessing risk of bias.

| Unique ID        | Randomization process | Deviations from intended interventions | Missing outcome data | Measurement of the outcome | Selection of the reported result | Over all      |
|------------------|-----------------------|----------------------------------------|----------------------|----------------------------|----------------------------------|---------------|
| Wang 2023 [17]   | High                  | High                                   | High                 | Low                        | Some concerns                    | High          |
| Zhang 2023 [18]  | Low                   | Low                                    | High                 | Low                        | Some concerns                    | High          |
| Qi 2023 [19]     | Low                   | Low                                    | Low                  | Low                        | Low                              | Low           |
| Liu 2022a [20]   | Low                   | Low                                    | Low                  | Low                        | Low                              | Low           |
| Liu 2022b [21]   | High                  | High                                   | Some concerns        | Some concerns              | Some concerns                    | High          |
| Zhang 2021 [22]  | Low                   | Some concerns                          | Low                  | Low                        | Low                              | Some concerns |
| Ba 2021 [23]     | Low                   | Some concerns                          | Low                  | Low                        | Low                              | Some concerns |
| Wang 2021a [24]  | Low                   | Low                                    | Low                  | Low                        | Low                              | Low           |
| Wang 2021b [25]  | Low                   | Low                                    | Low                  | Low                        | Low                              | Low           |
| Lu 2020 [26]     | Low                   | Low                                    | Low                  | Low                        | Low                              | Low           |
| Liu 2020 [27]    | Low                   | Low                                    | Low                  | Low                        | Low                              | Low           |
| Wang 2020a [28]  | Low                   | Low                                    | Low                  | Low                        | Low                              | Low           |
| Zhang 2019 [29]  | Low                   | Low                                    | Low                  | Low                        | Low                              | Low           |
| Su 2019 [30]     | Low                   | Low                                    | Low                  | Low                        | Low                              | Low           |
| Jing 2019 [31]   | Low                   | Low                                    | Low                  | Low                        | Low                              | Low           |
| Zeng 2017 [32]   | Low                   | Low                                    | Low                  | Low                        | Low                              | Low           |
| Wu 2017a [33]    | Low                   | Low                                    | Low                  | Low                        | Low                              | Low           |
| Cai 2017 [34]    | Low                   | Low                                    | Low                  | Low                        | Low                              | Low           |
| Yu 2016 [35]     | Low                   | Low                                    | Low                  | Low                        | Low                              | Low           |
| Sang 2016 [36]   | Low                   | Low                                    | Low                  | Low                        | Low                              | Low           |
| Chang 2015 [37]  | Low                   | Low                                    | Low                  | Low                        | Low                              | Low           |
| Zhang 2015a [38] | Low                   | Low                                    | Low                  | Low                        | Low                              | Low           |
| He 2014 [39]     | Some concerns         | Some concerns                          | Low                  | Low                        | Low                              | High          |
| Zhu 2013 [40]    | Low                   | Low                                    | Low                  | Low                        | Low                              | Low           |
| Xiao 2013 [41]   | Low                   | Low                                    | Low                  | Low                        | Low                              | Low           |
| Liu 2012 [42]    | Low                   | Low                                    | Low                  | Low                        | Low                              | Low           |
| Wang 2022 [43]   | Low                   | Low                                    | Low                  | Low                        | Low                              | Low           |
| Lin 2022 [44]    | Low                   | Low                                    | Low                  | Low                        | Low                              | Low           |
| Liu 2021 [45]    | Low                   | Low                                    | Low                  | Low                        | Low                              | Low           |
| Yi 2021 [46]     | Low                   | Low                                    | Low                  | Low                        | Low                              | Low           |
| Han 2021 [47]    | Low                   | Low                                    | Low                  | Low                        | Low                              | Low           |
| Zhou 2021a [48]  | Low                   | Low                                    | Low                  | Low                        | Low                              | Low           |
| Qian 2020 [49]   | Low                   | Low                                    | Low                  | Low                        | Low                              | Low           |
| Zhao 2020 [50]   | Low                   | Low                                    | Low                  | Low                        | Low                              | Low           |
| Peng 2019 [51]   | Low                   | Low                                    | Low                  | Low                        | Low                              | Low           |
| Liu 2018 [52]    | Some concerns         | Some concerns                          | Low                  | Low                        | Low                              | High          |
| Ma 2017 [53]     | Low                   | Low                                    | Low                  | Low                        | Low                              | Low           |
| Mei 2017 [54]    | Low                   | Low                                    | Low                  | Low                        | Low                              | Low           |
| Chen 2016 [55]   | Low                   | Low                                    | Low                  | Low                        | Low                              | Low           |
| Su 2016 [56]     | Low                   | Low                                    | Low                  | Low                        | Low                              | Low           |
| Zhou 2015 [57]   | Low                   | Low                                    | Low                  | Low                        | Low                              | Low           |
| Luo 2018 [58]    | High                  | High                                   | High                 | Low                        | Some concerns                    | High          |

|                  |               |               |               |               |               |               |
|------------------|---------------|---------------|---------------|---------------|---------------|---------------|
| Li 2017 [59]     | Low           | Low           | High          | Low           | Some concerns | High          |
| Zhang 2016 [60]  | Low           | Low           | Low           | Low           | Low           | Low           |
| Li 2015 [61]     | Low           | Low           | Low           | Low           | Low           | Low           |
| Liu 2014a [62]   | High          | High          | Some concerns | Some concerns | Some concerns | High          |
| Zhang 2011 [63]  | Low           | Some concerns | Low           | Low           | Low           | Some concerns |
| Sun 2008 [64]    | Low           | Some concerns | Low           | Low           | Low           | Some concerns |
| Fan 2015 [65]    | Low           | Low           | Low           | Low           | Low           | Low           |
| Jiang 2009 [66]  | Low           | Low           | Low           | Low           | Low           | Low           |
| Li 2009 [67]     | Low           | Low           | Low           | Low           | Low           | Low           |
| Wu 2017b [68]    | Low           | Low           | Low           | Low           | Low           | Low           |
| Qiao 2013 [69]   | Low           | Low           | Low           | Low           | Low           | Low           |
| Qiao 2012 [70]   | Low           | Low           | Low           | Low           | Low           | Low           |
| Ji 2010 [71]     | Low           | Low           | Low           | Low           | Low           | Low           |
| Xu 2010 [72]     | Low           | Low           | Low           | Low           | Low           | Low           |
| Cao 2023 [73]    | Low           | Low           | Low           | Low           | Low           | Low           |
| Wang 2018 [74]   | Low           | Low           | Low           | Low           | Low           | Low           |
| Luo 2022 [75]    | Low           | Low           | Low           | Low           | Low           | Low           |
| Liu 2014b [76]   | Low           | Low           | Low           | Low           | Low           | Low           |
| Qin 2009 [77]    | Low           | Low           | Low           | Low           | Low           | Low           |
| Sun 2021 [78]    | Low           | Low           | Low           | Low           | Low           | Low           |
| Nan 2021 [79]    | Low           | Low           | Low           | Low           | Low           | Low           |
| Wang 2020b [80]  | Some concerns | Some concerns | Low           | Low           | Low           | High          |
| Xu 2018 [81]     | Low           | Low           | Low           | Low           | Low           | Low           |
| Zheng 2015 [82]  | Low           | Low           | Low           | Low           | Low           | Low           |
| Zhu 2011 [83]    | Low           | Low           | Low           | Low           | Low           | Low           |
| Wu 2014 [84]     | Low           | Low           | Low           | Low           | Low           | Low           |
| Zhu 2014 [85]    | Low           | Low           | Low           | Low           | Low           | Low           |
| Cheng 2016 [86]  | Low           | Low           | Low           | Low           | Low           | Low           |
| Zhang 2015b [87] | Low           | Low           | Low           | Low           | Low           | Low           |
| Xu 2014 [88]     | Low           | Low           | Low           | Low           | Low           | Low           |
| Lin 2015 [89]    | Low           | Low           | Low           | Low           | Low           | Low           |
| Hao 2012 [90]    | Low           | Low           | Low           | Low           | Low           | Low           |
| Zhou 2021b [91]  | Low           | Low           | Low           | Low           | Low           | Low           |
| Zhu 2016 [92]    | Low           | Low           | Low           | Low           | Low           | Low           |

Appendix 5: Evaluation of consistency and heterogeneity

| Parameters | Outcomes                   | Study                | Consistency |          |           |                |
|------------|----------------------------|----------------------|-------------|----------|-----------|----------------|
|            |                            |                      | Totresdev   | pD       | DIC       | I <sup>2</sup> |
| Efficacy   | Total effective rate       | 73 studies, n = 8032 | 117.27459   | 89.16267 | 206.43726 | 0%             |
|            | Pain symptom score         | 47 studies, n = 5137 | 93.69871    | 91.07531 | 184.77402 | 0.7%           |
|            | Urination disorder score   | 46 studies, n = 5037 | 91.97477    | 88.88236 | 180.85713 | 1%             |
|            | Quality of life score      | 41 studies, n = 4550 | 82.44761    | 77.79581 | 160.24342 | 2%             |
|            | NIH-CPSI score             | 58 studies, n = 6515 | 116.1222    | 111.7685 | 227.8907  | 1%             |
|            | EPS white blood cell count | 29 studies, n = 3231 | 59.28397    | 56.66179 | 115.94577 | 4%             |
| Safety     | Adverse events             | 24 studies, n = 2440 | 46.25119    | 35.88413 | 82.13531  | 0%             |

# Appendix 6: Density plots and Trajectory plots of comparisons of each outcome

## 1. Total effective rate

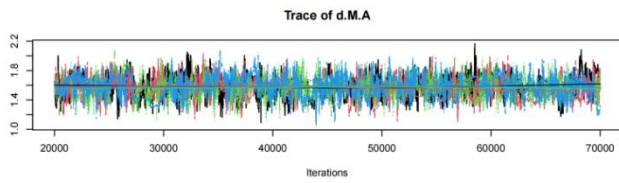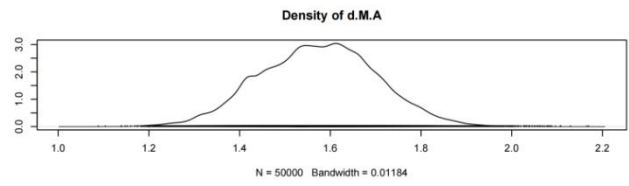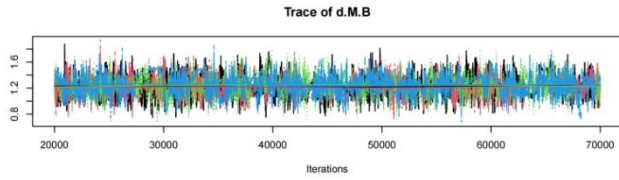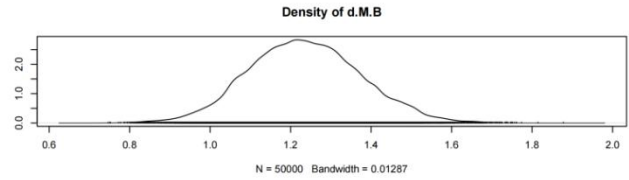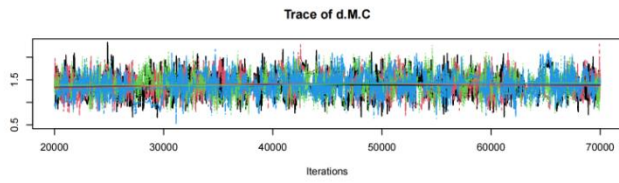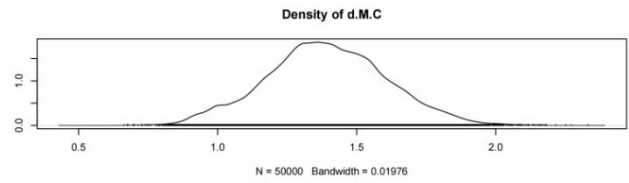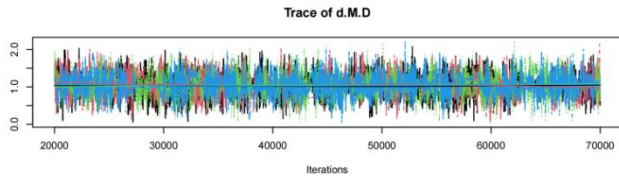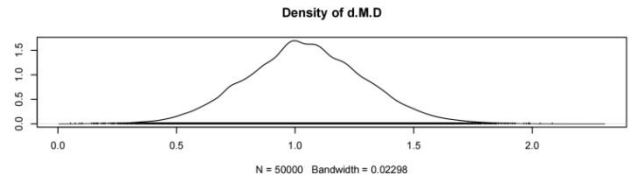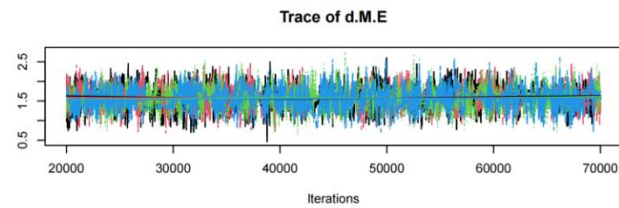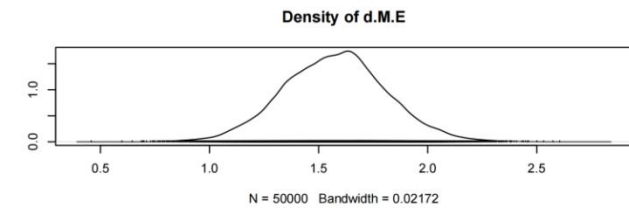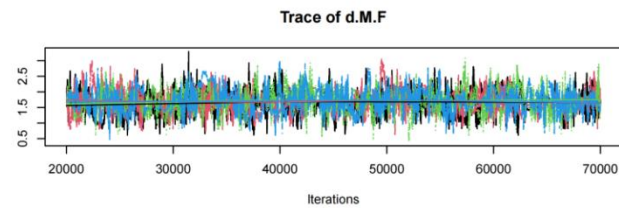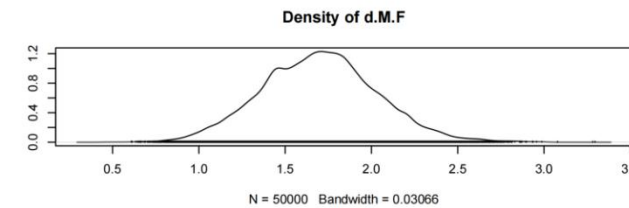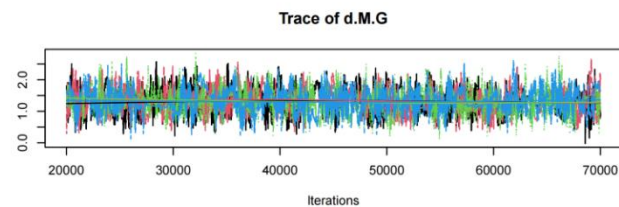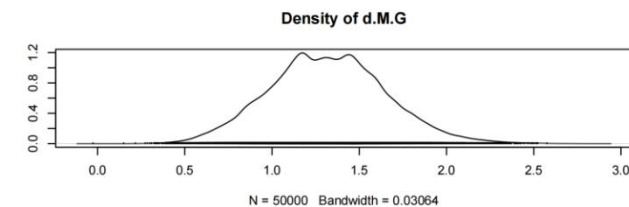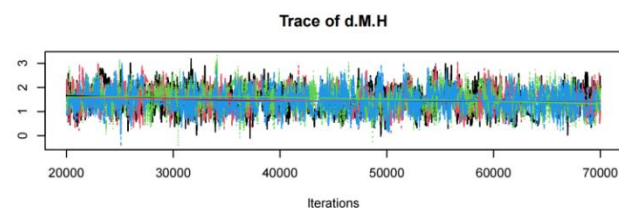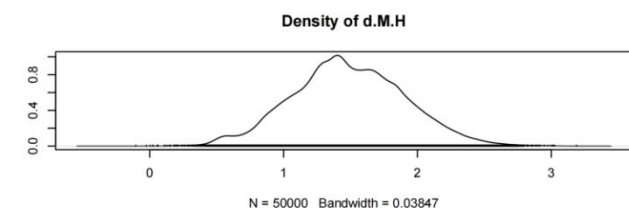

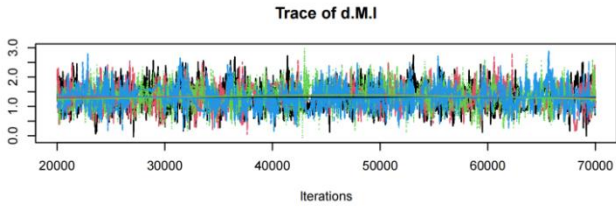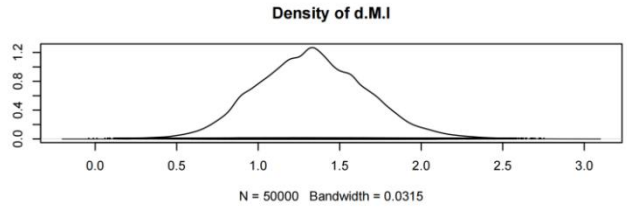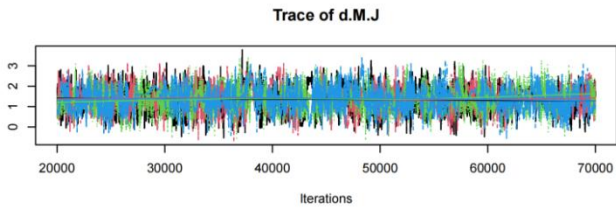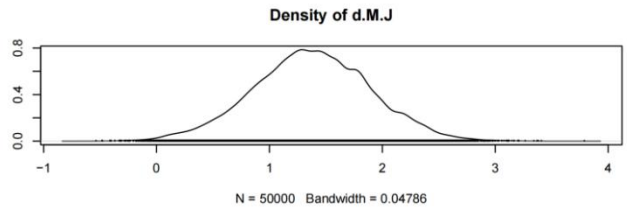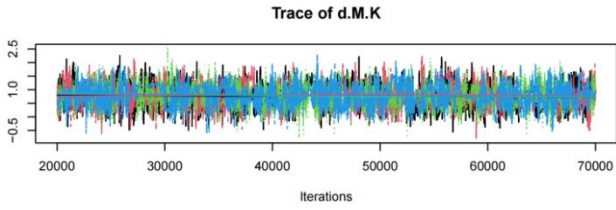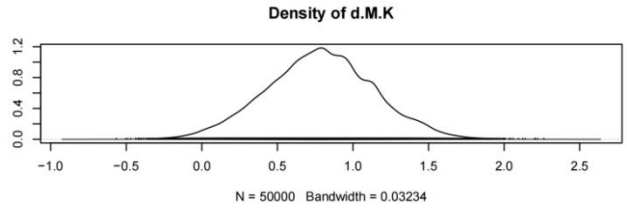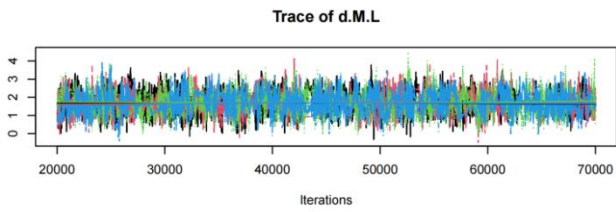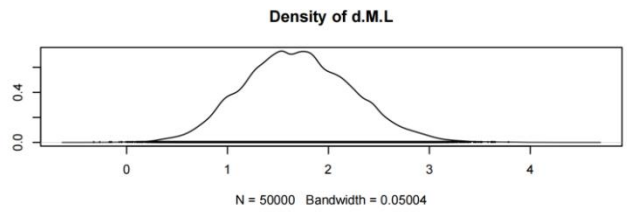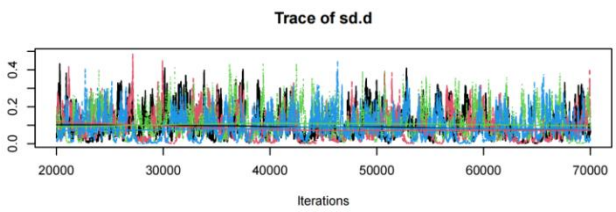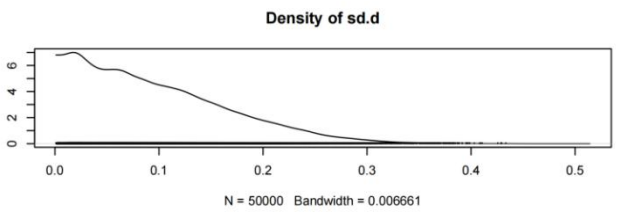

## 2. Pain symptom score

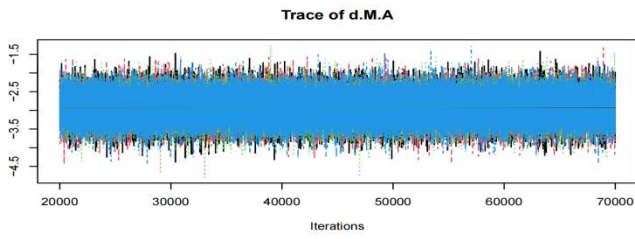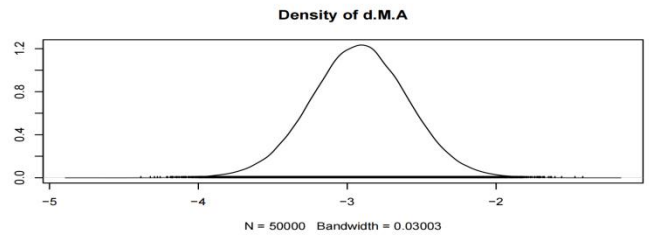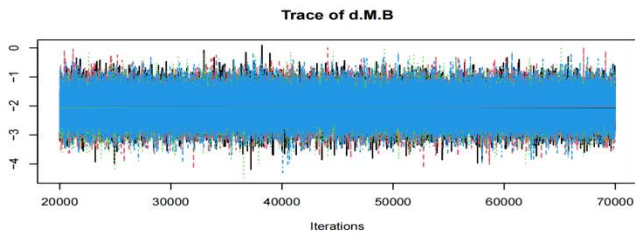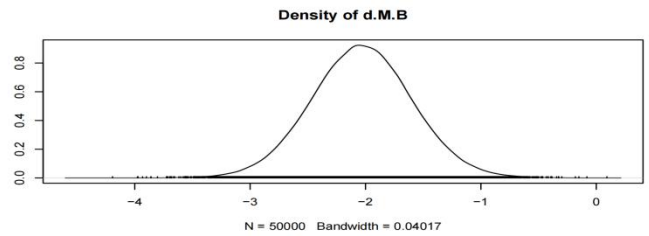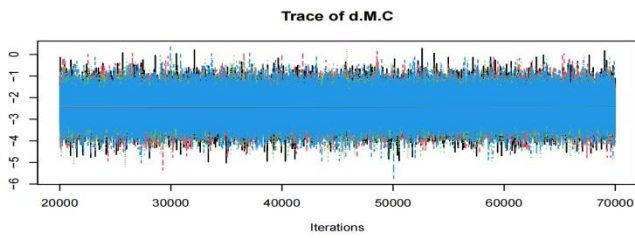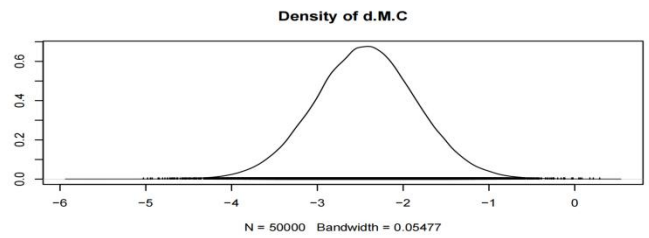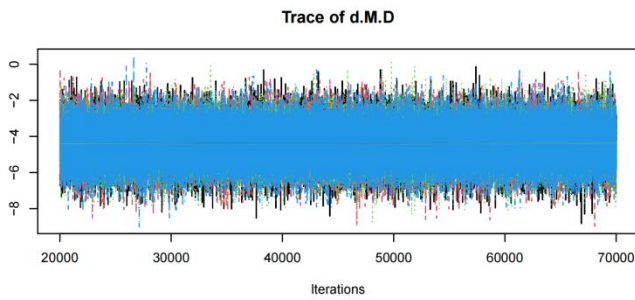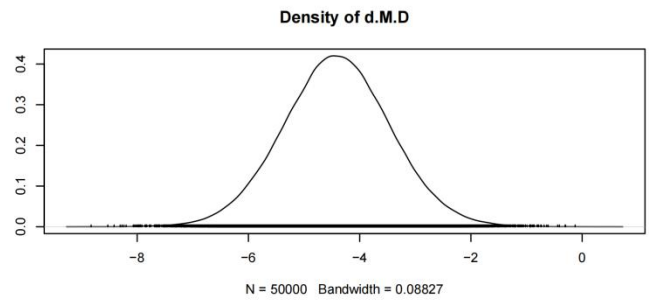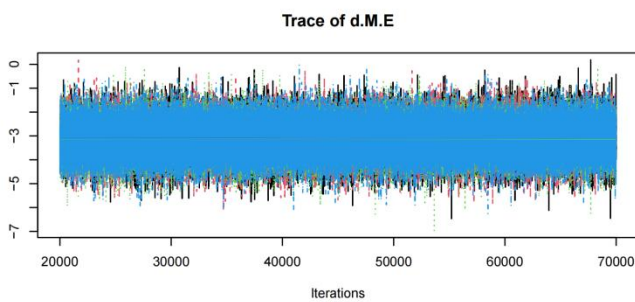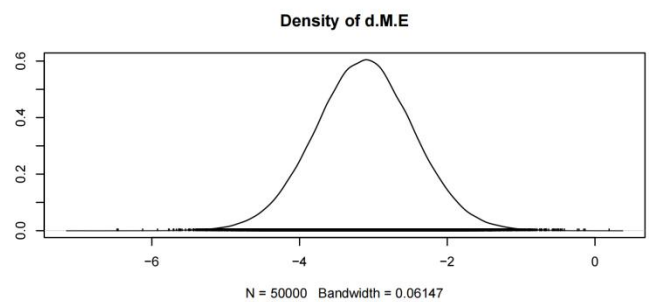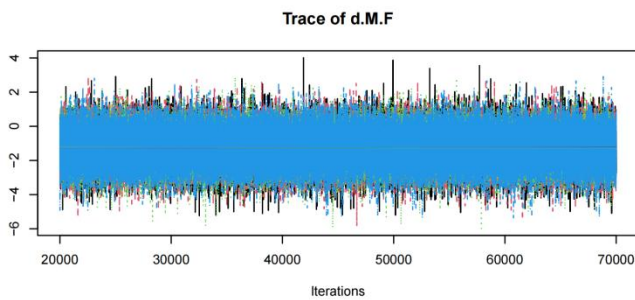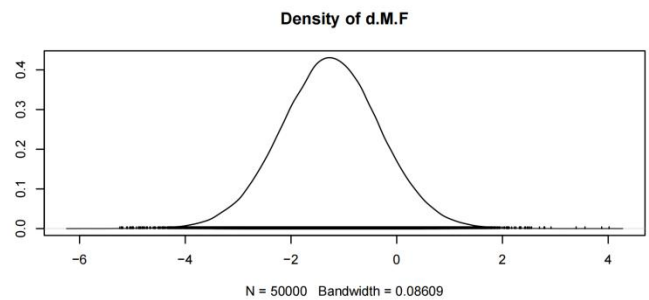

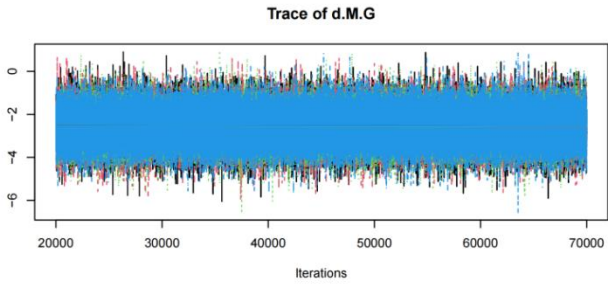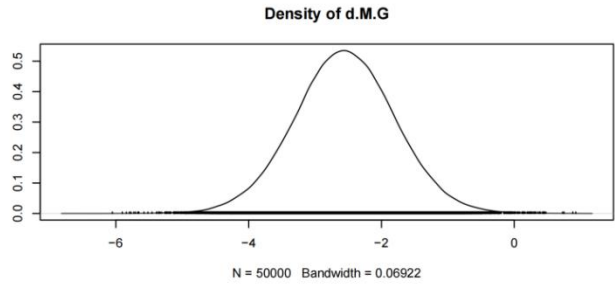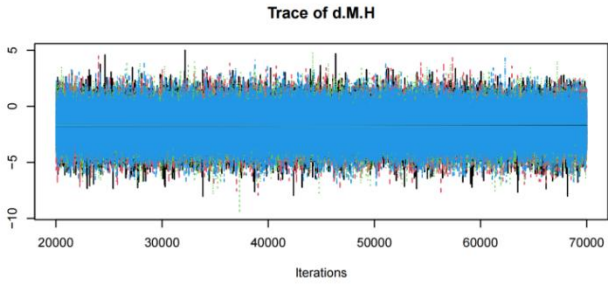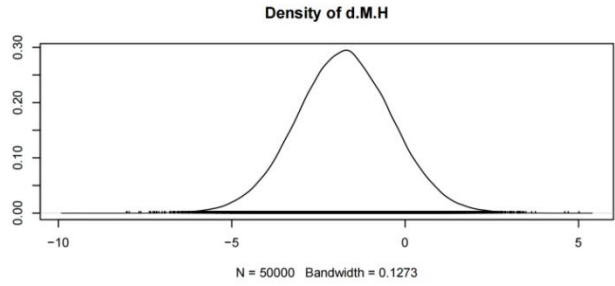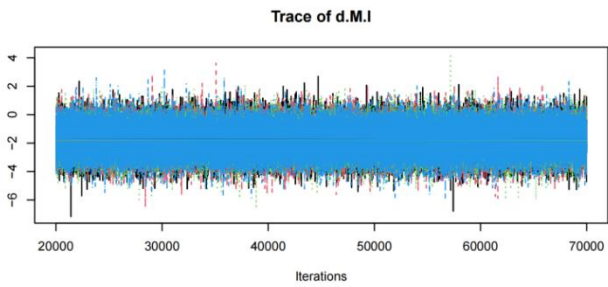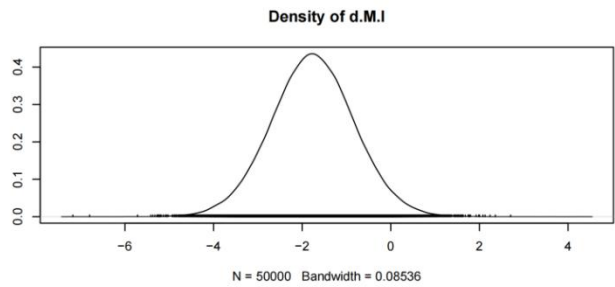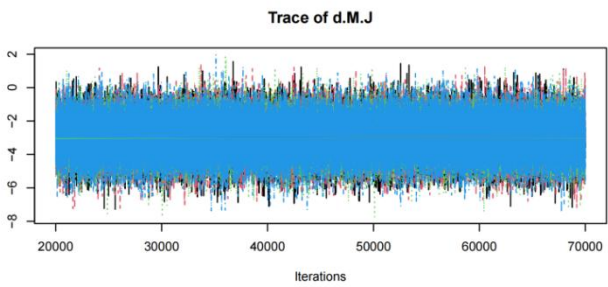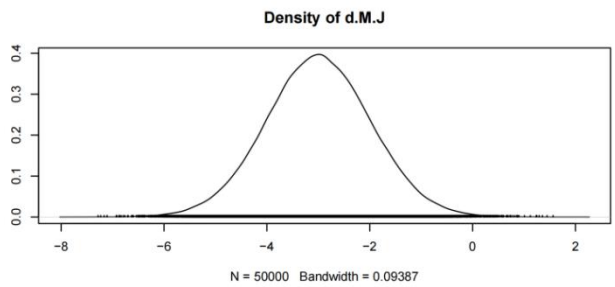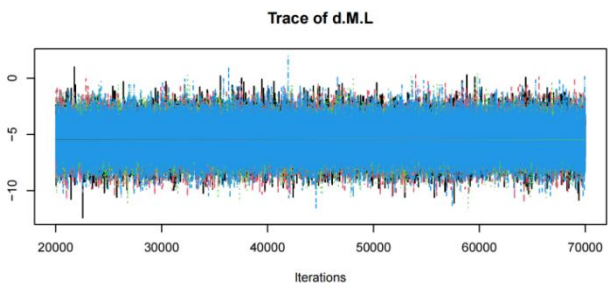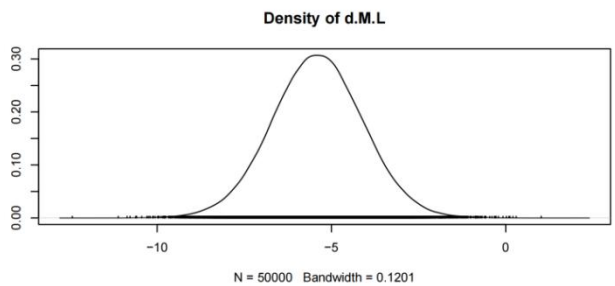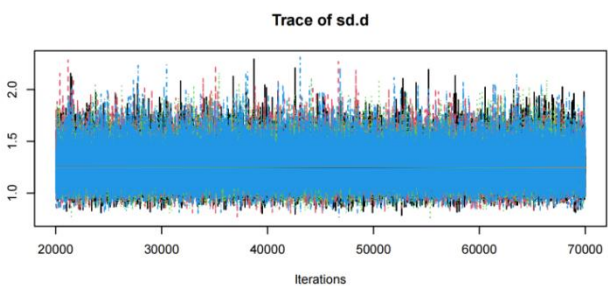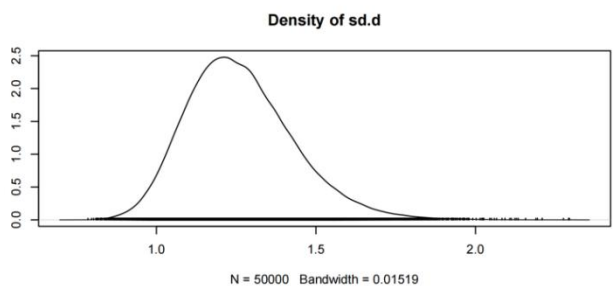

### 3. Urination disorder score

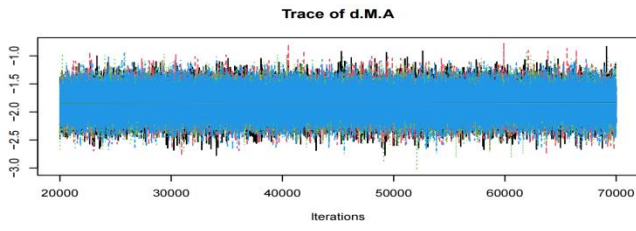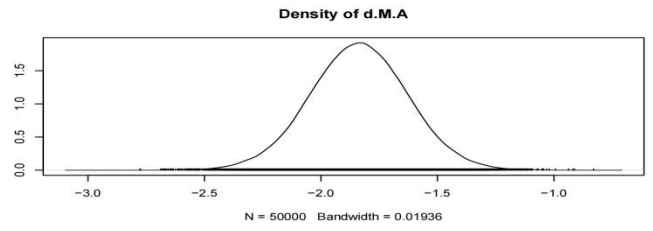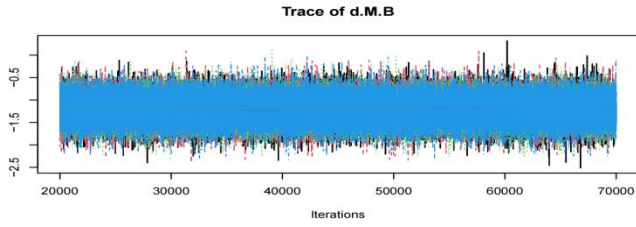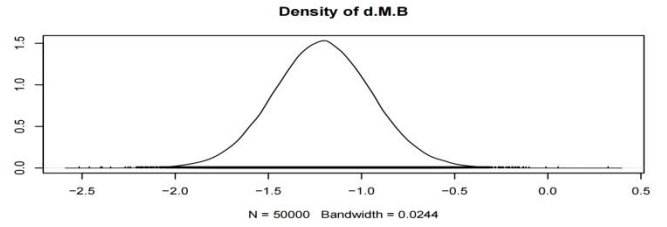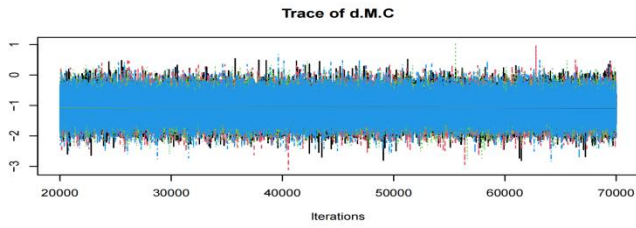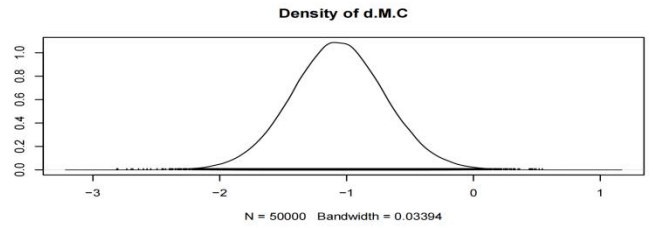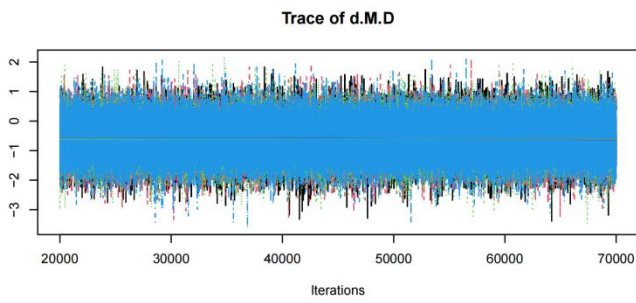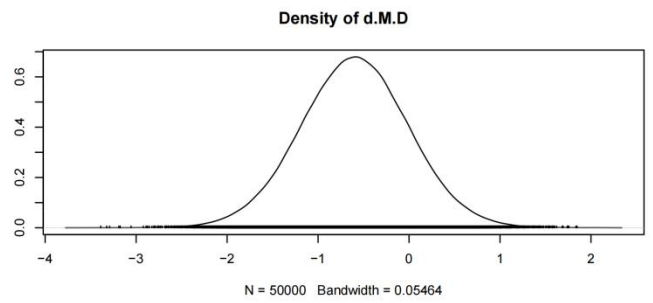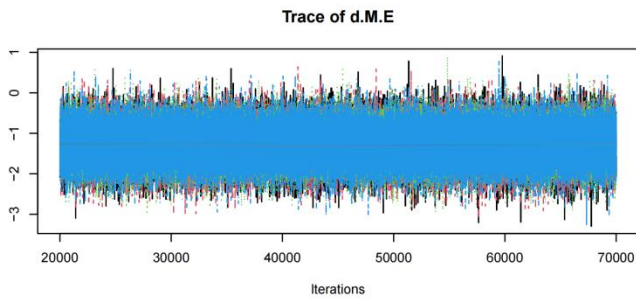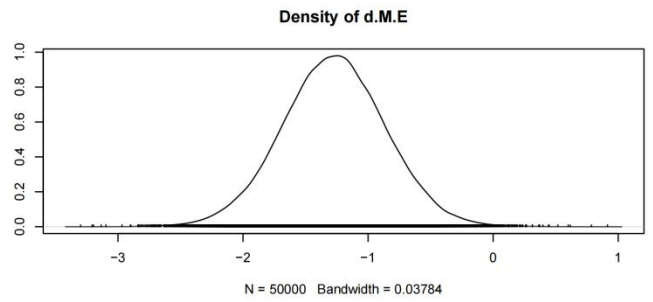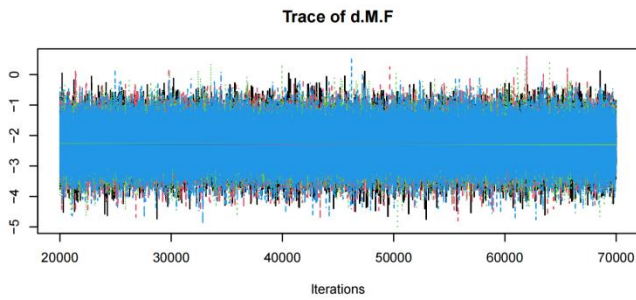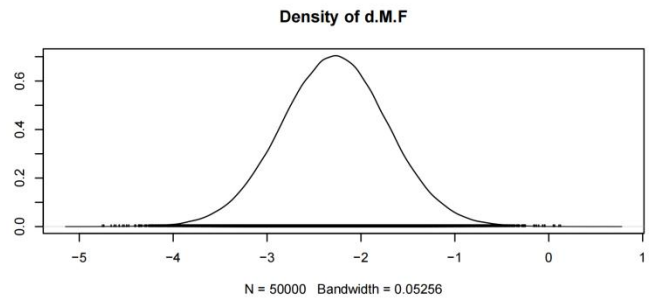

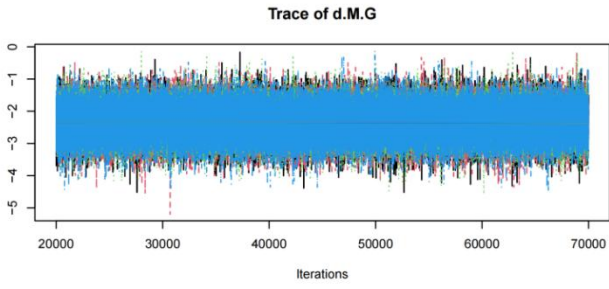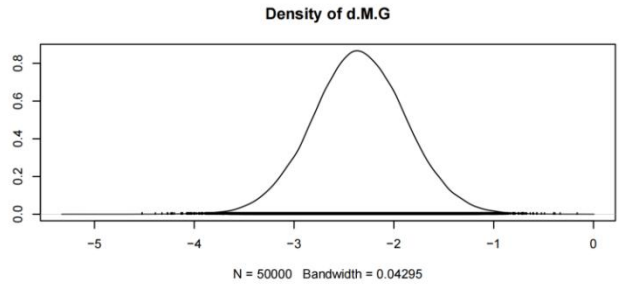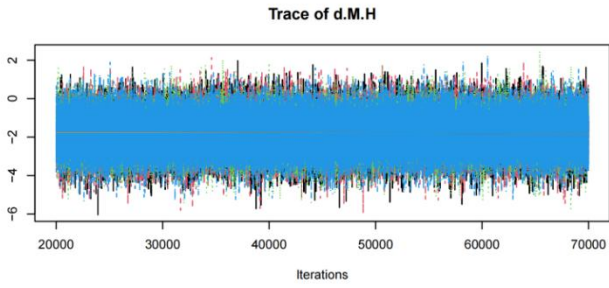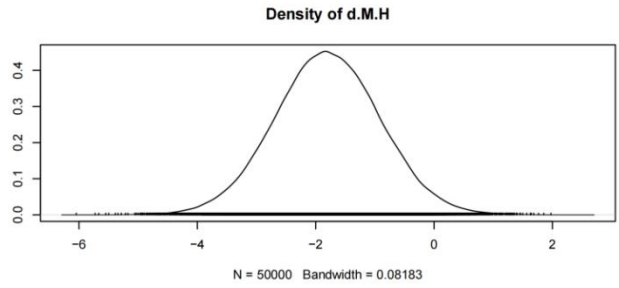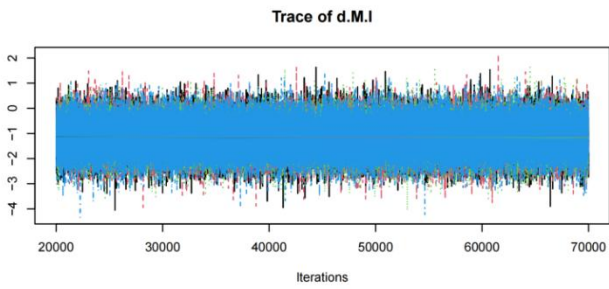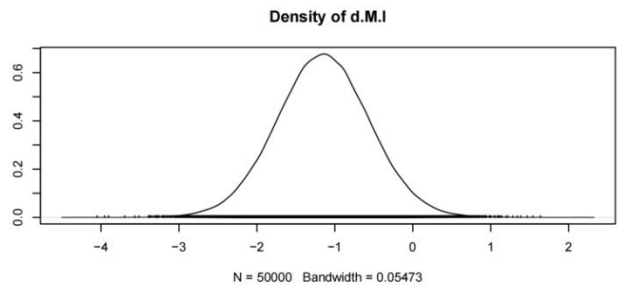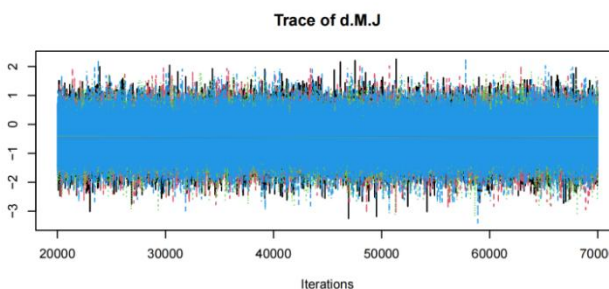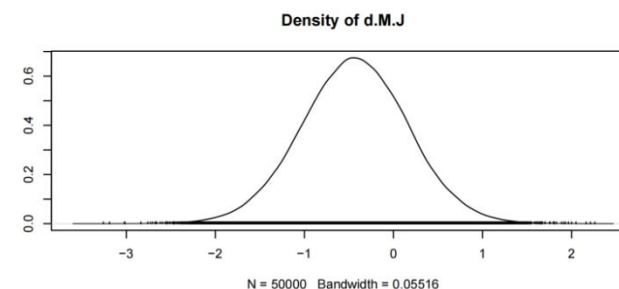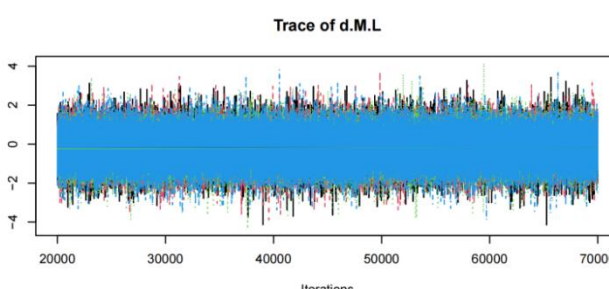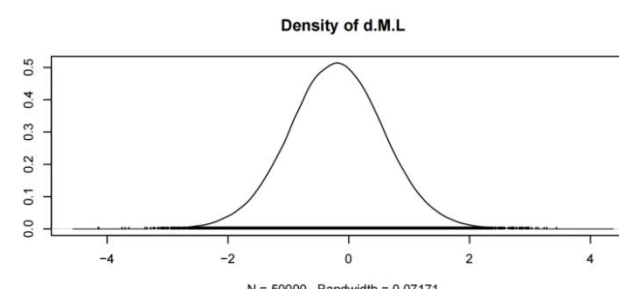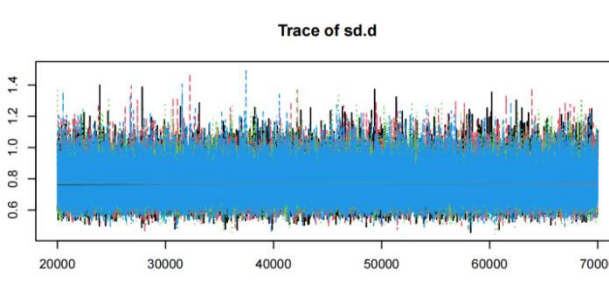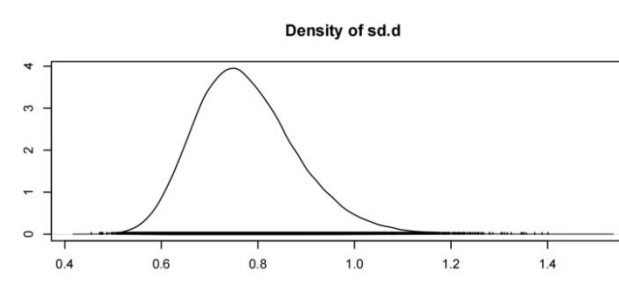

## 4. Quality of life score

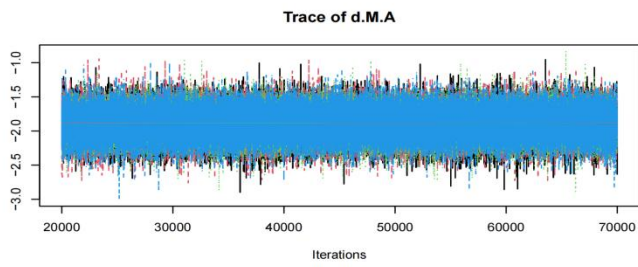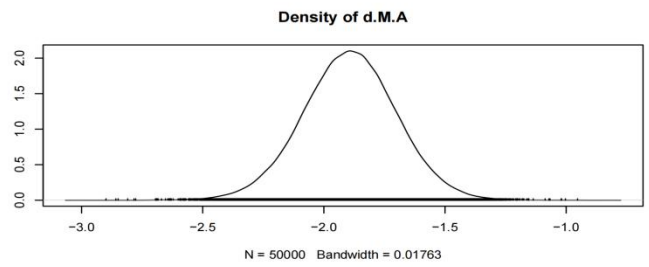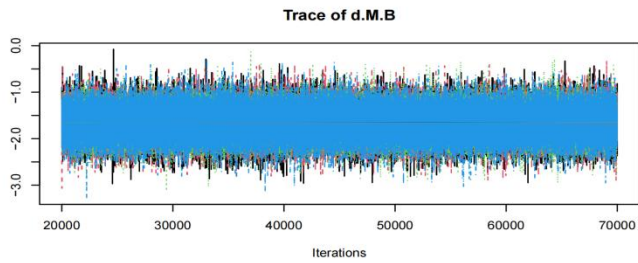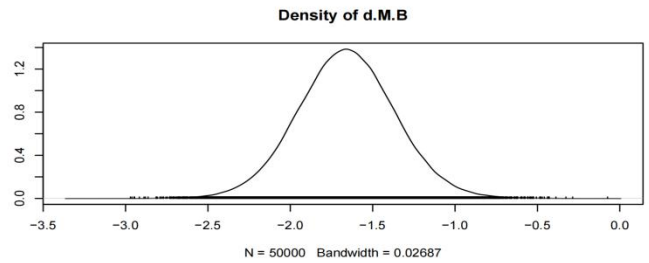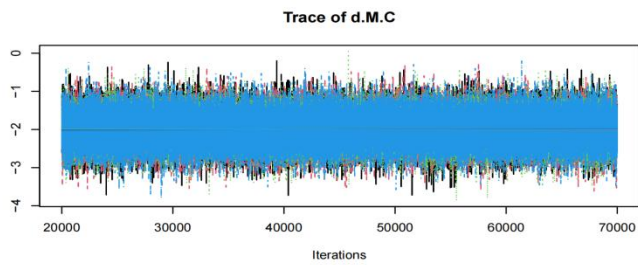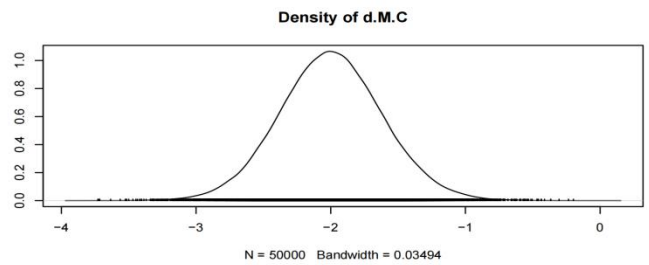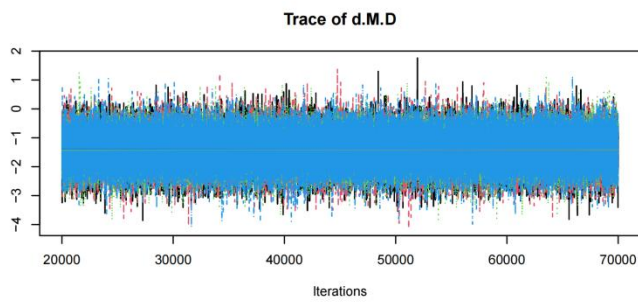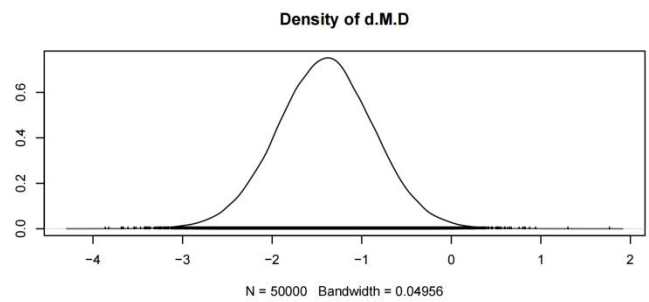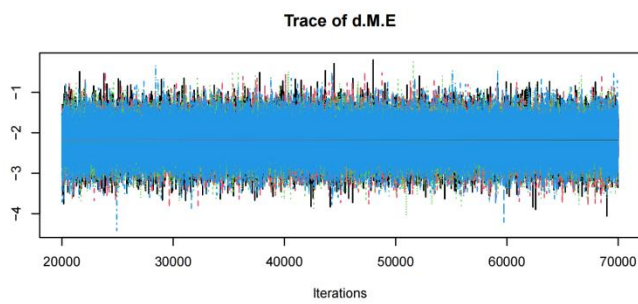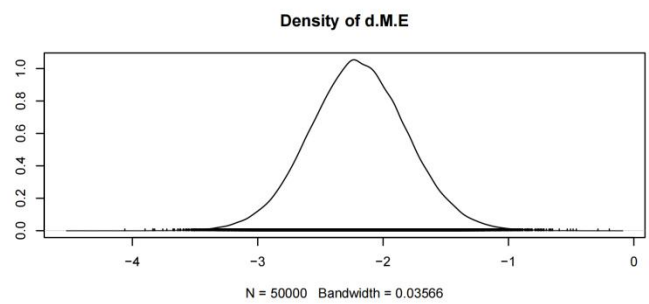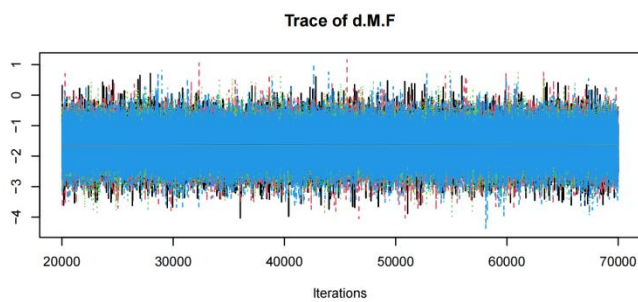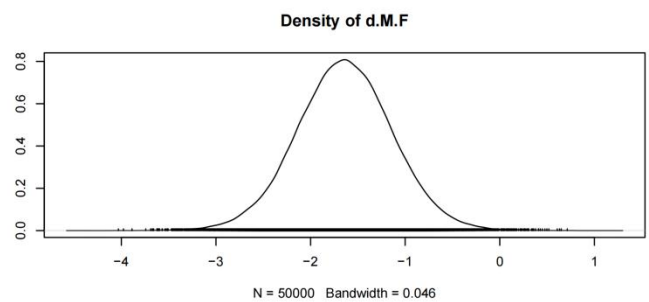

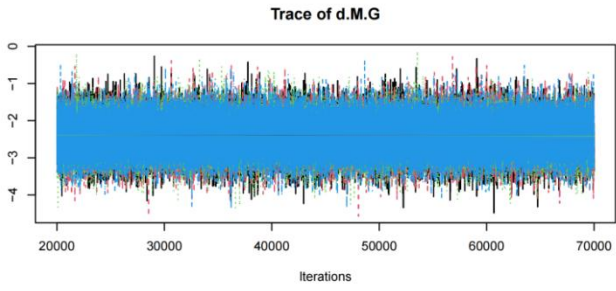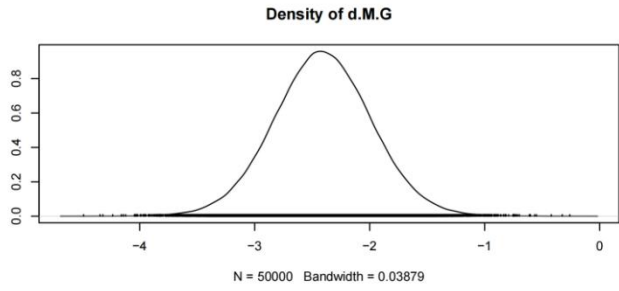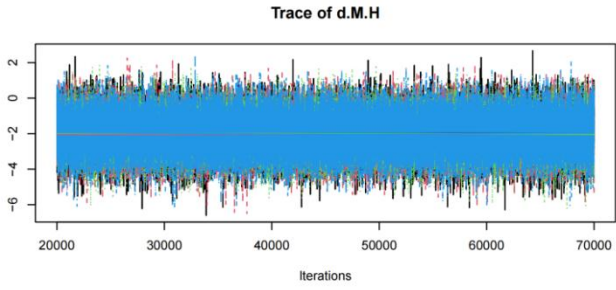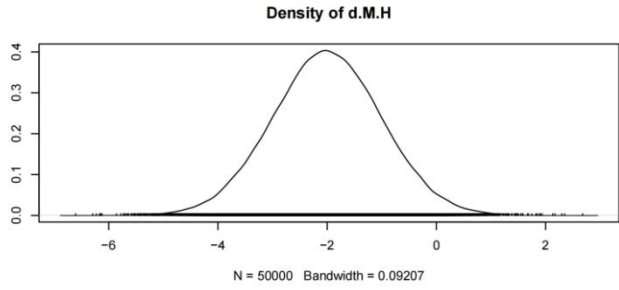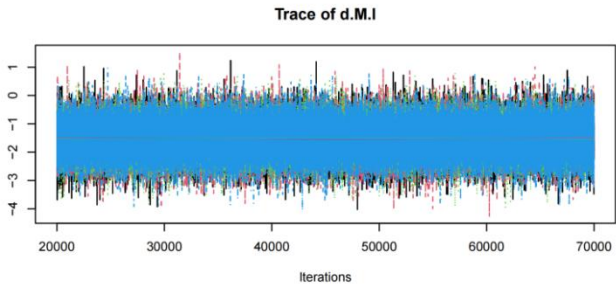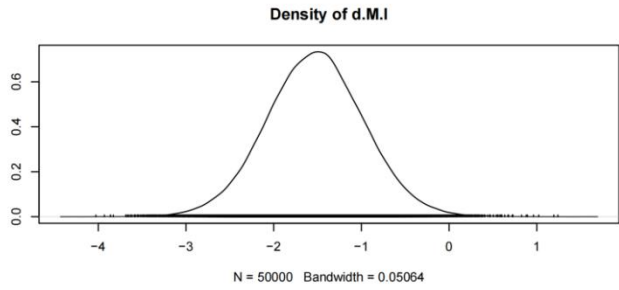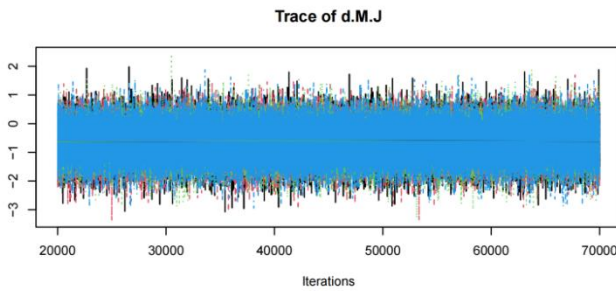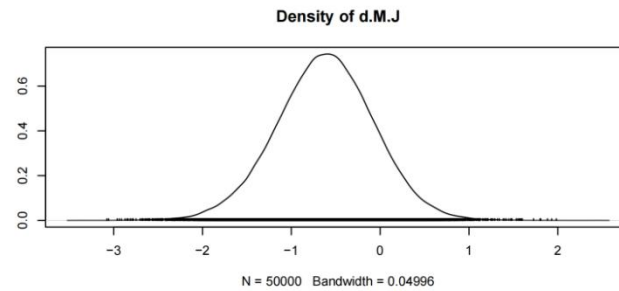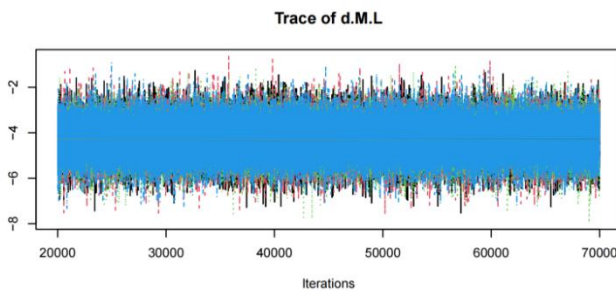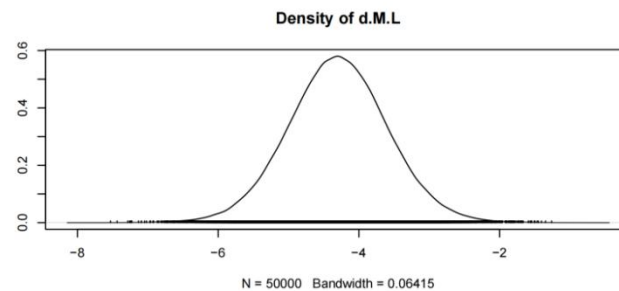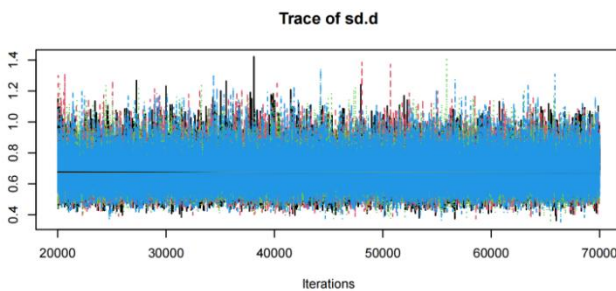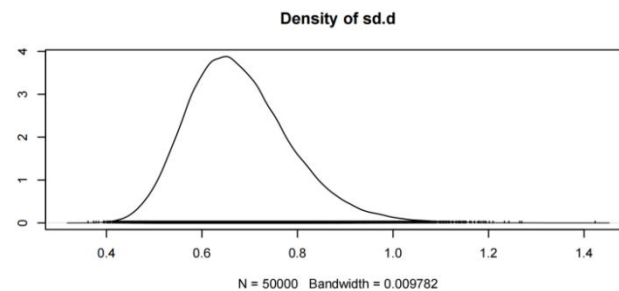

## 5. NIH-CPSI score

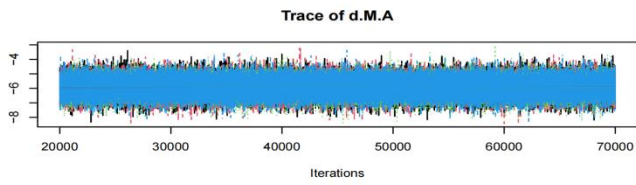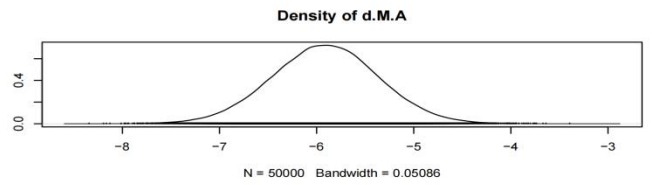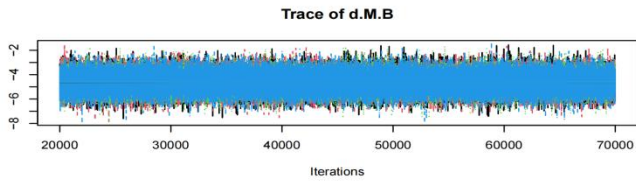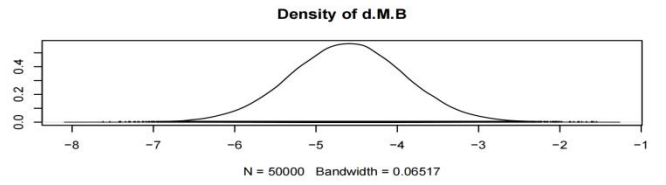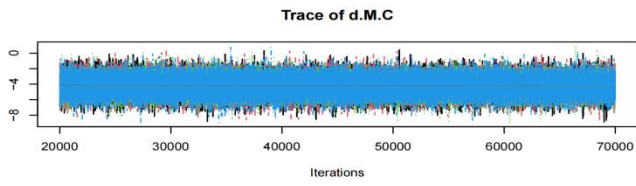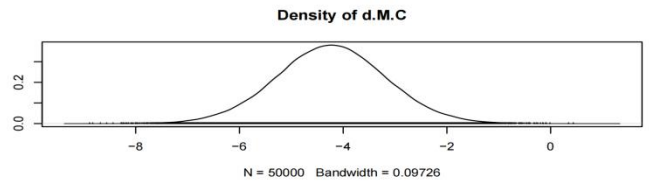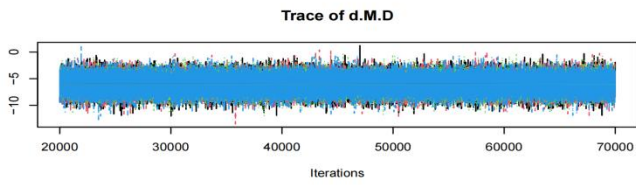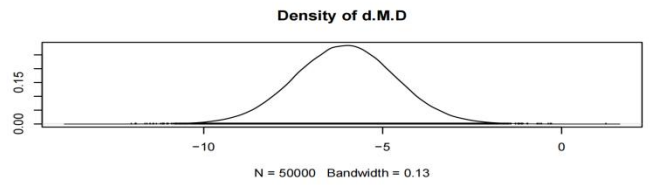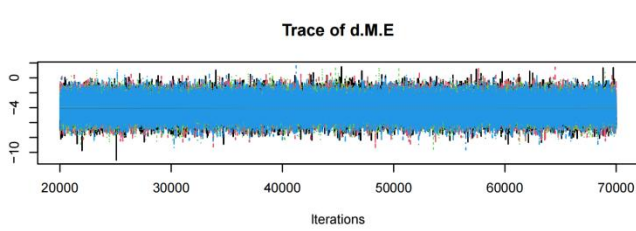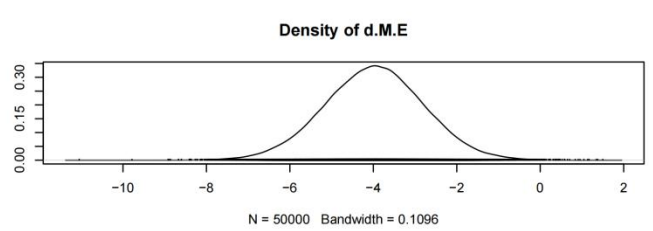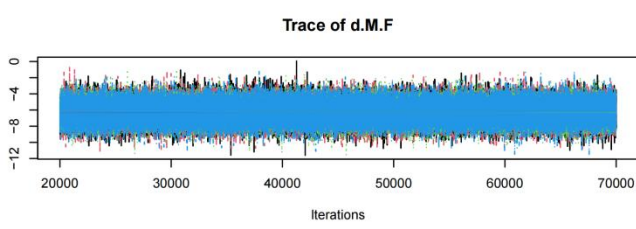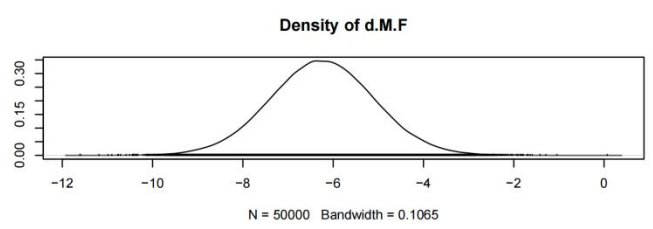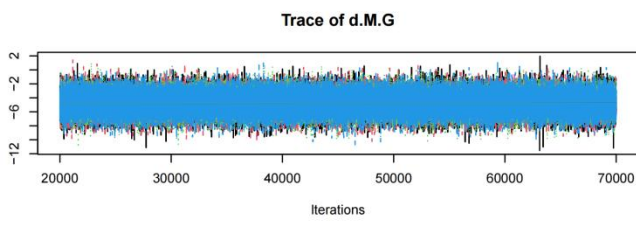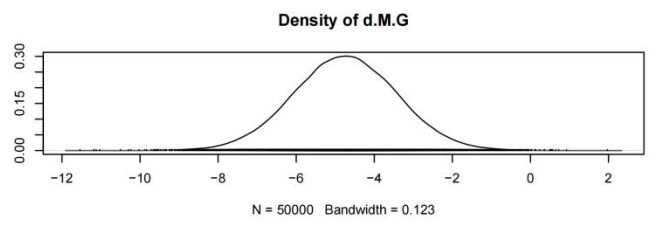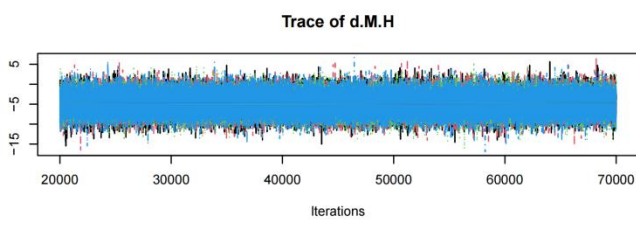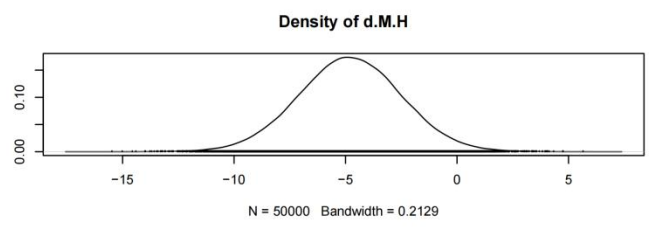

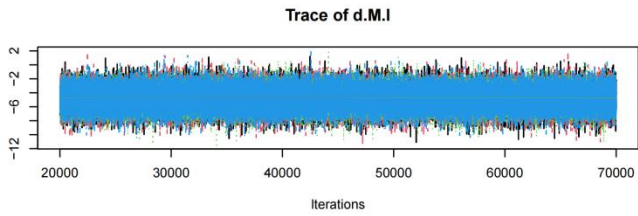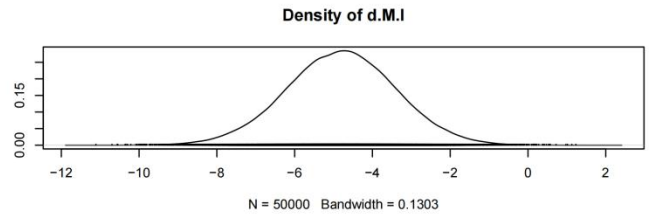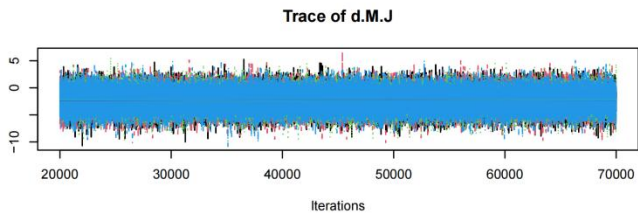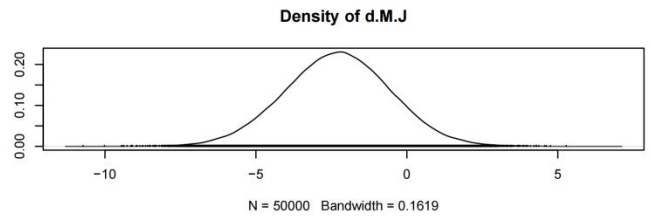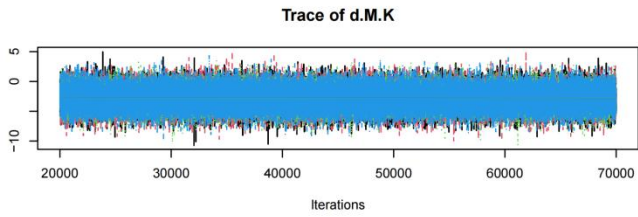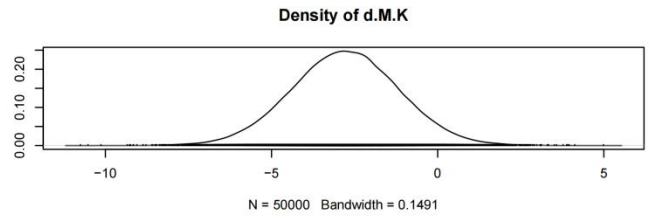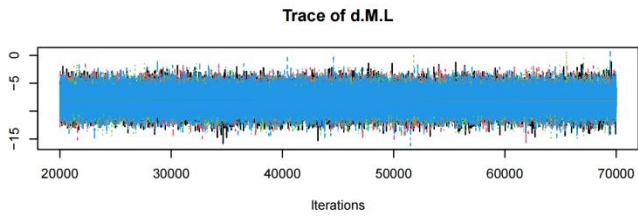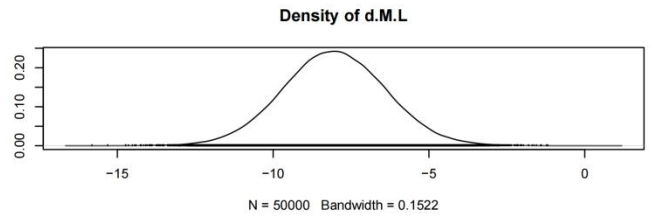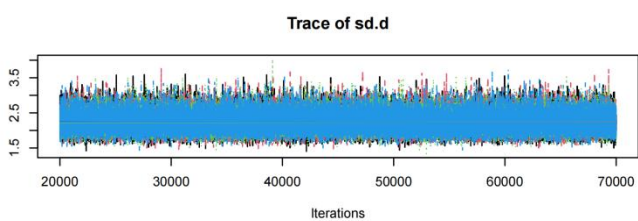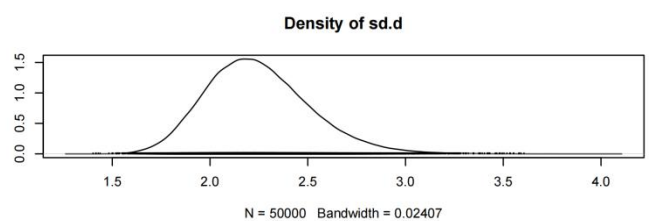

## 6. EPS white blood cell count

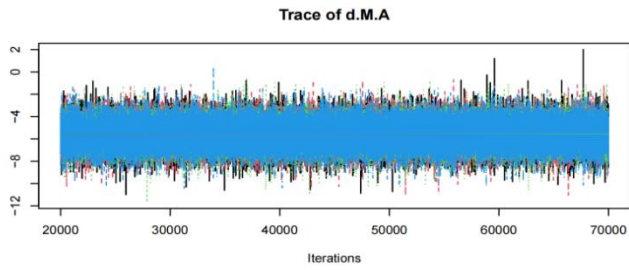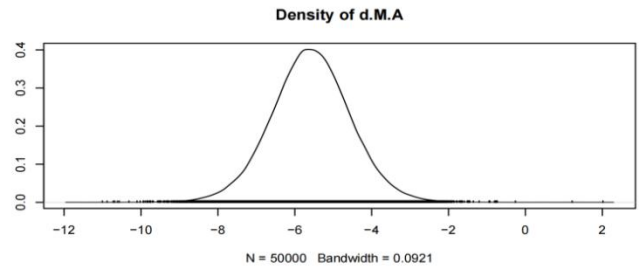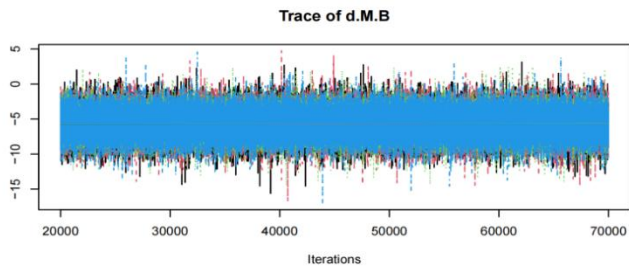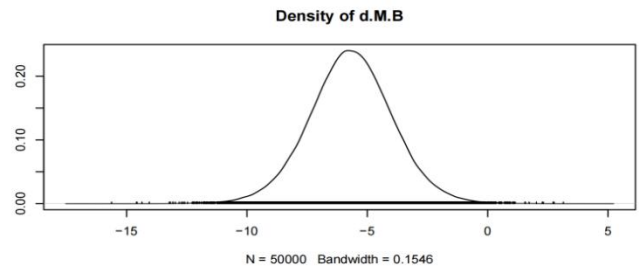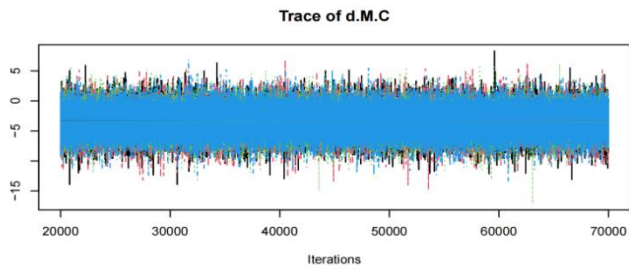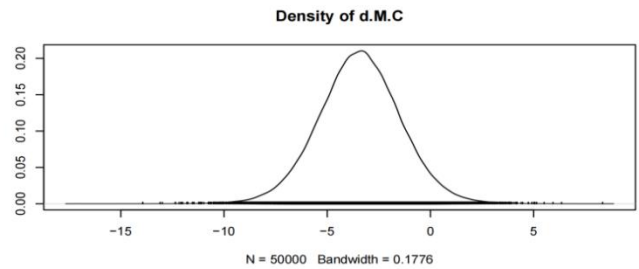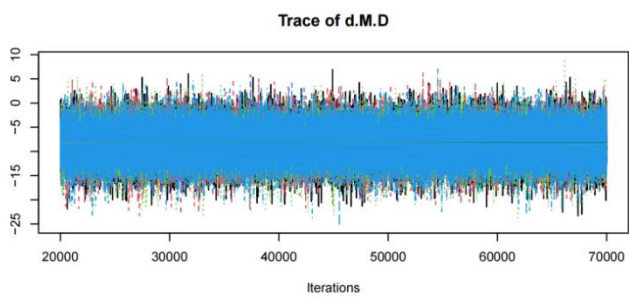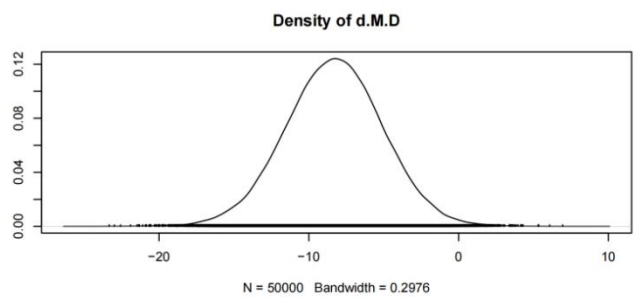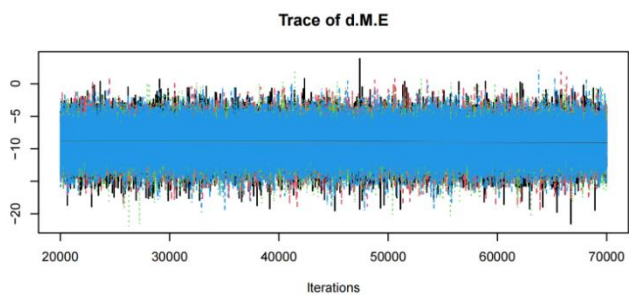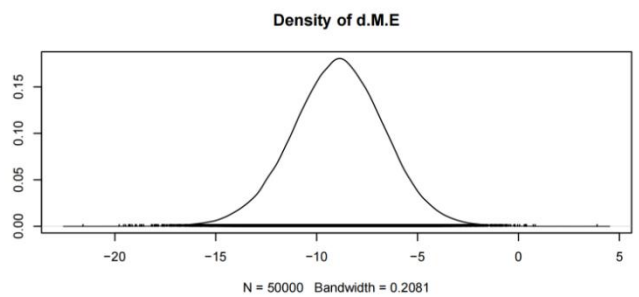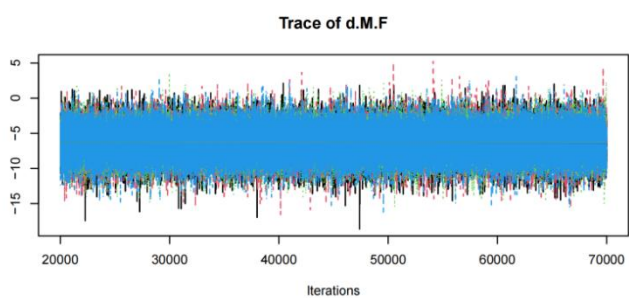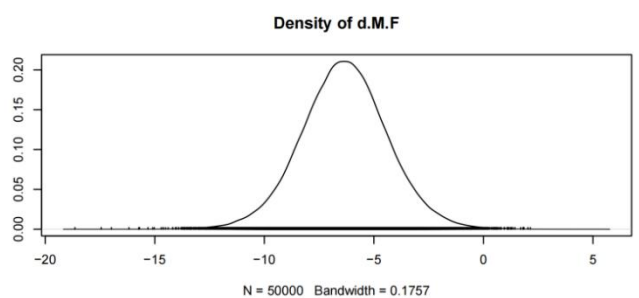

Trace of d.M.G

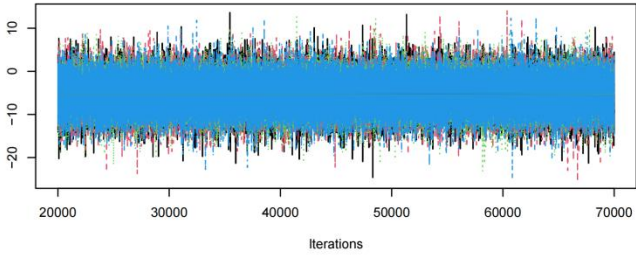

Density of d.M.G

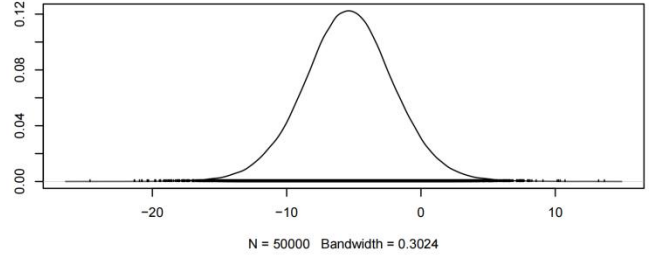

Trace of d.M.I

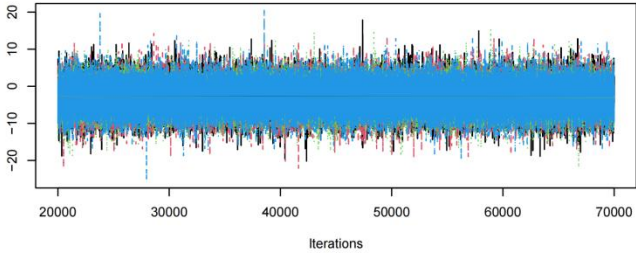

Density of d.M.I

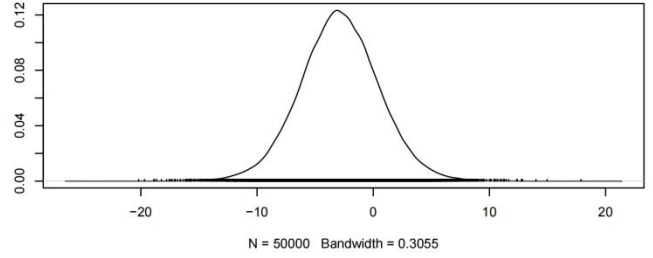

Trace of d.M.L

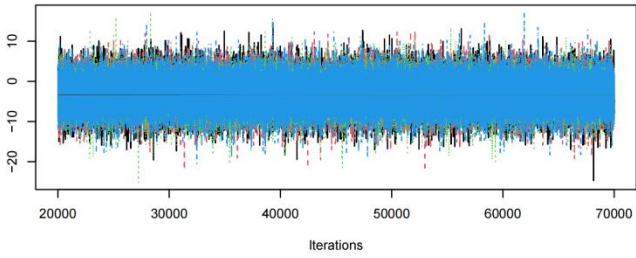

Density of d.M.L

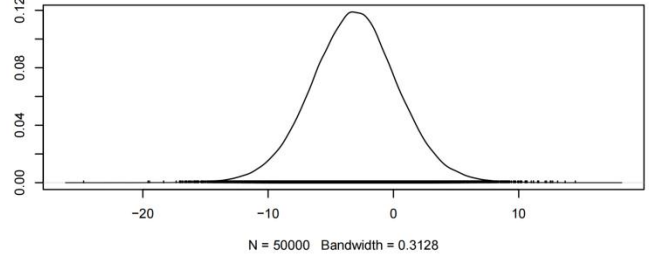

Trace of sd.d

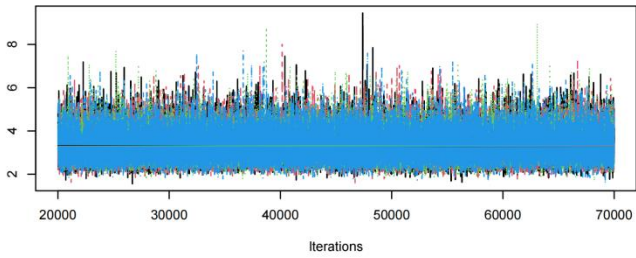

Density of sd.d

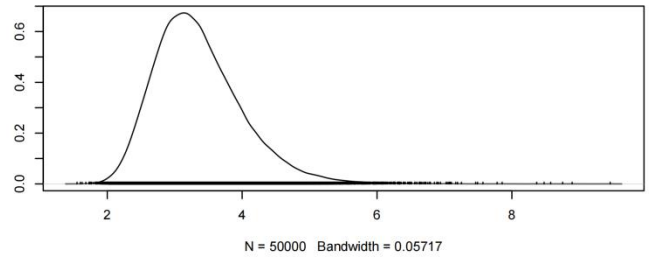

## 7. Adverse events

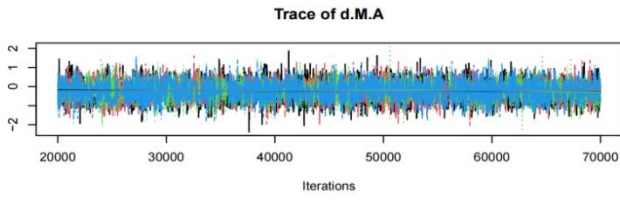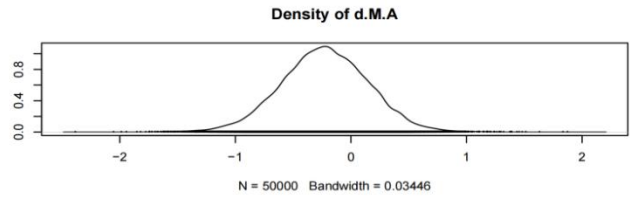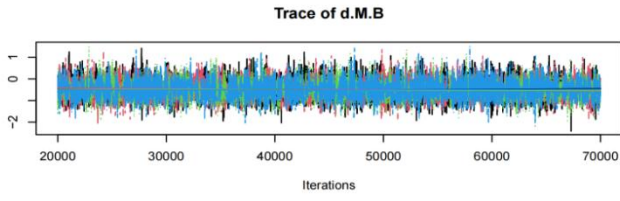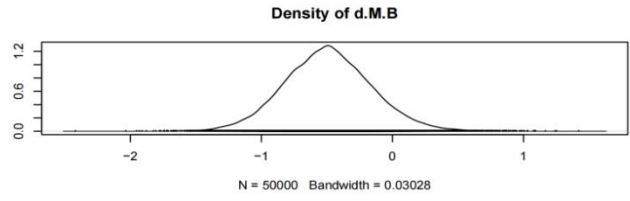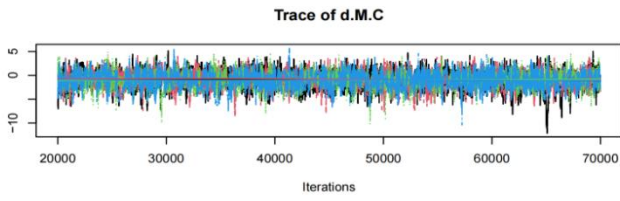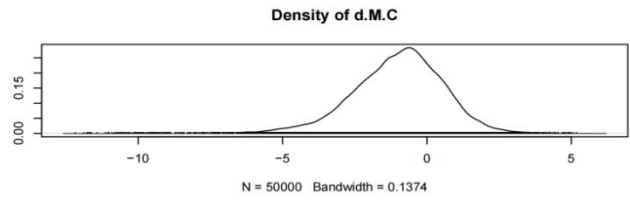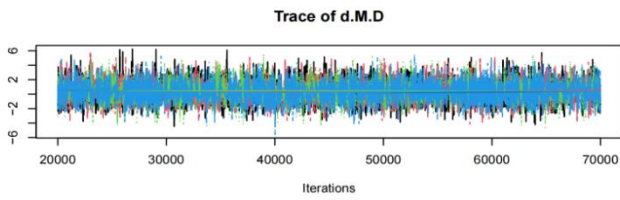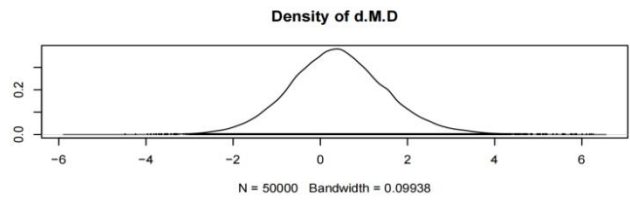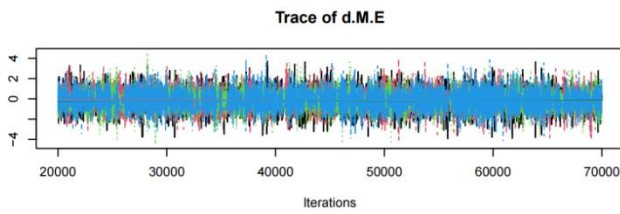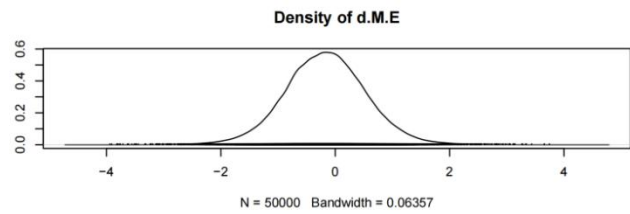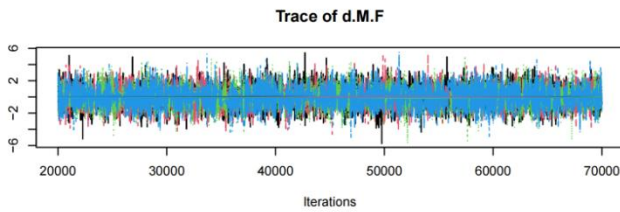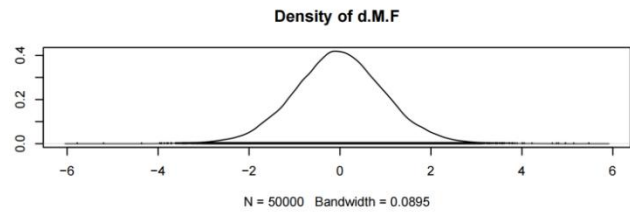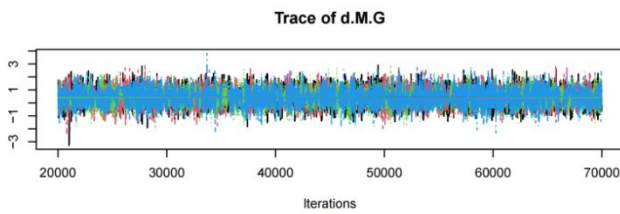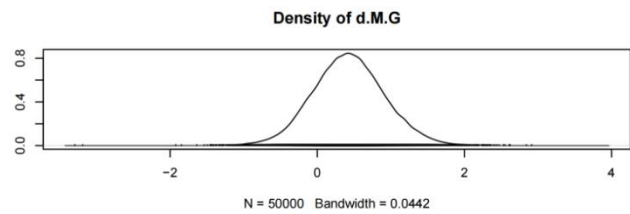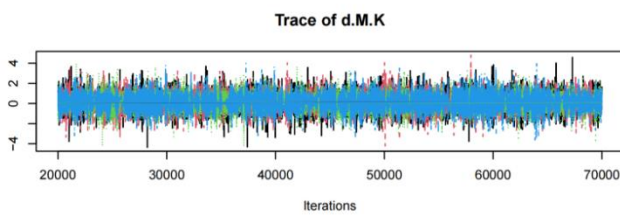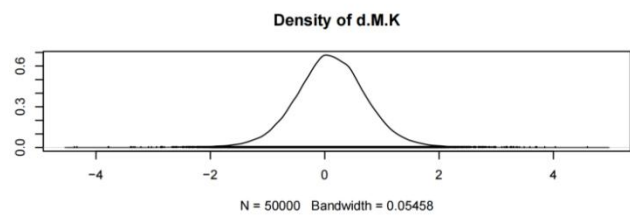

# Appendix 7: Convergence Diagnostic Plot of comparisons of each outcome

## 1. Total effective rate

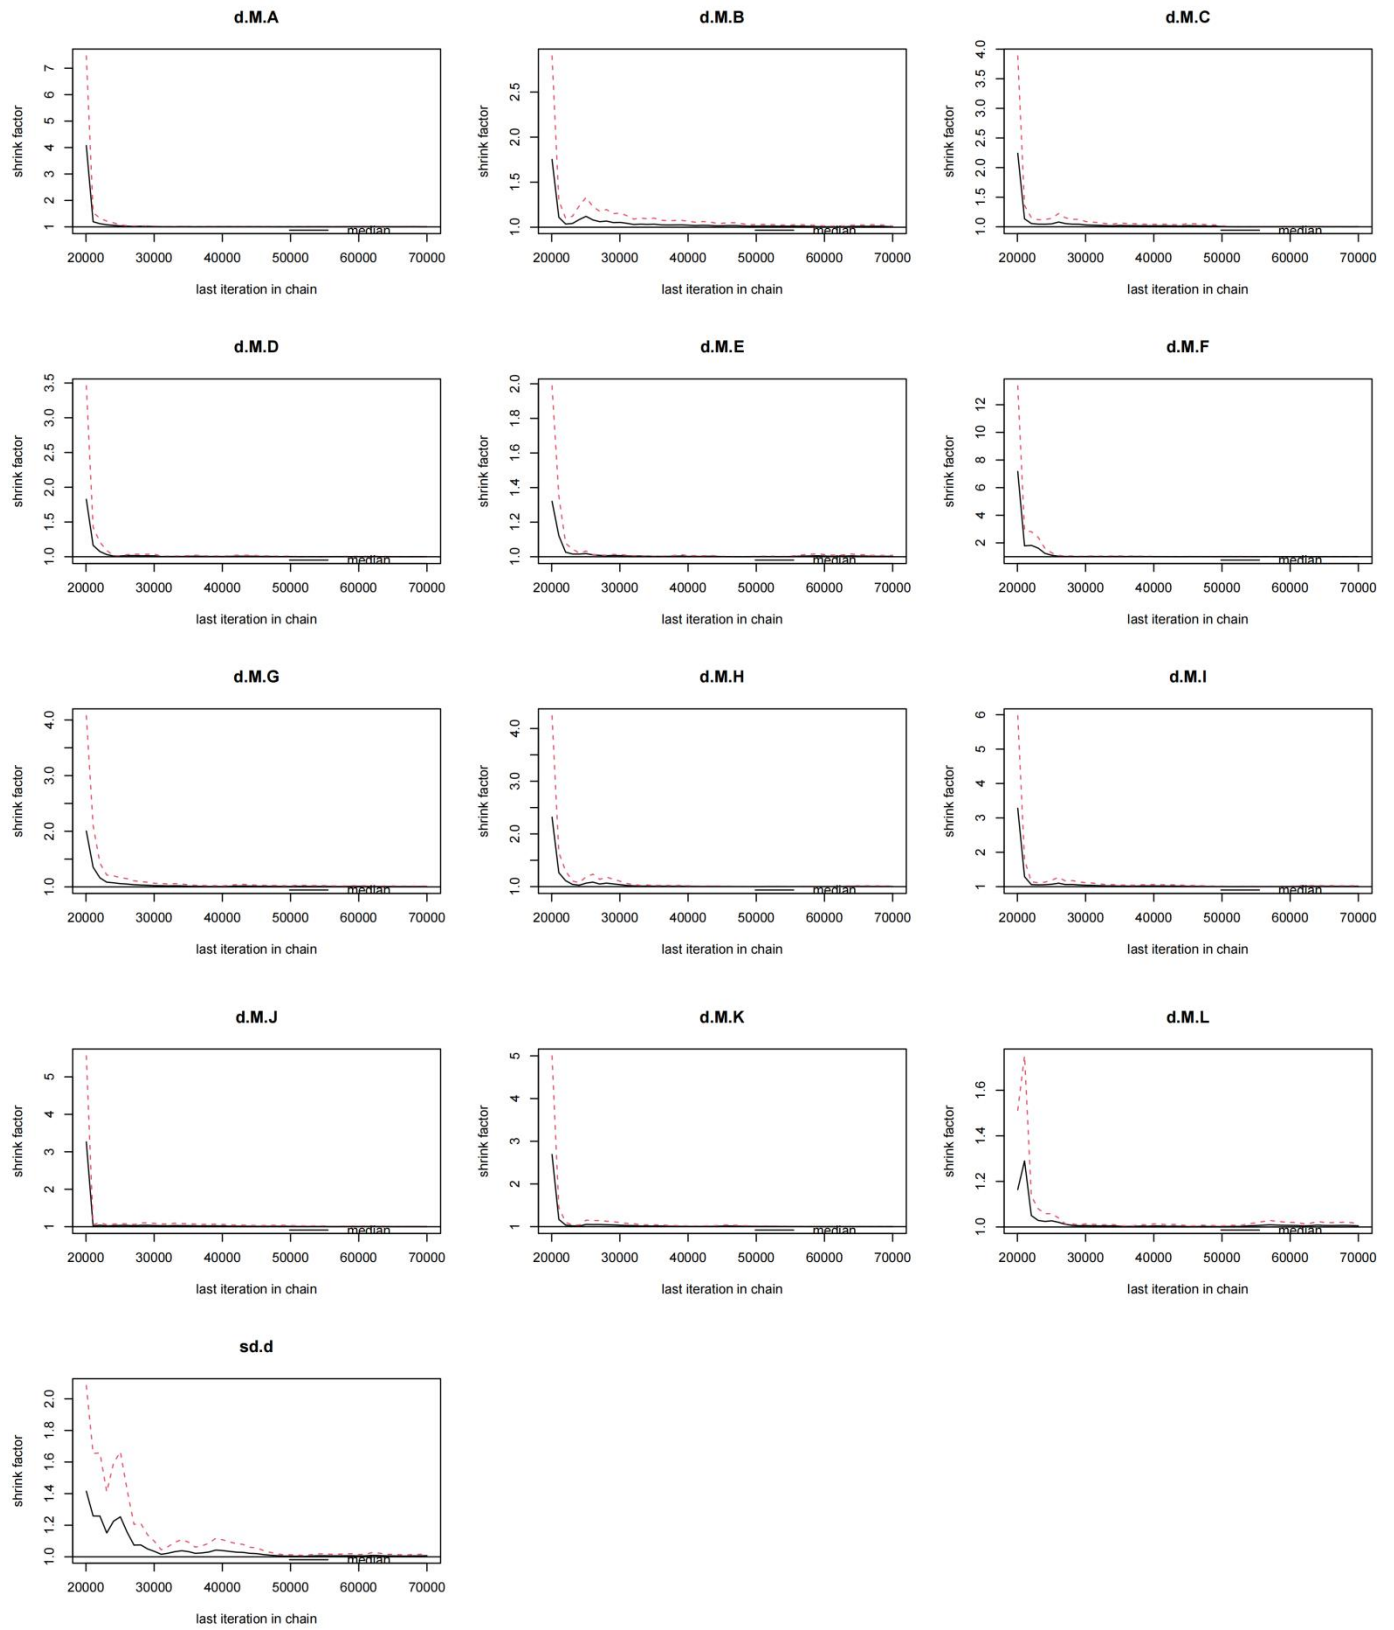

## 2. Pain symptom score

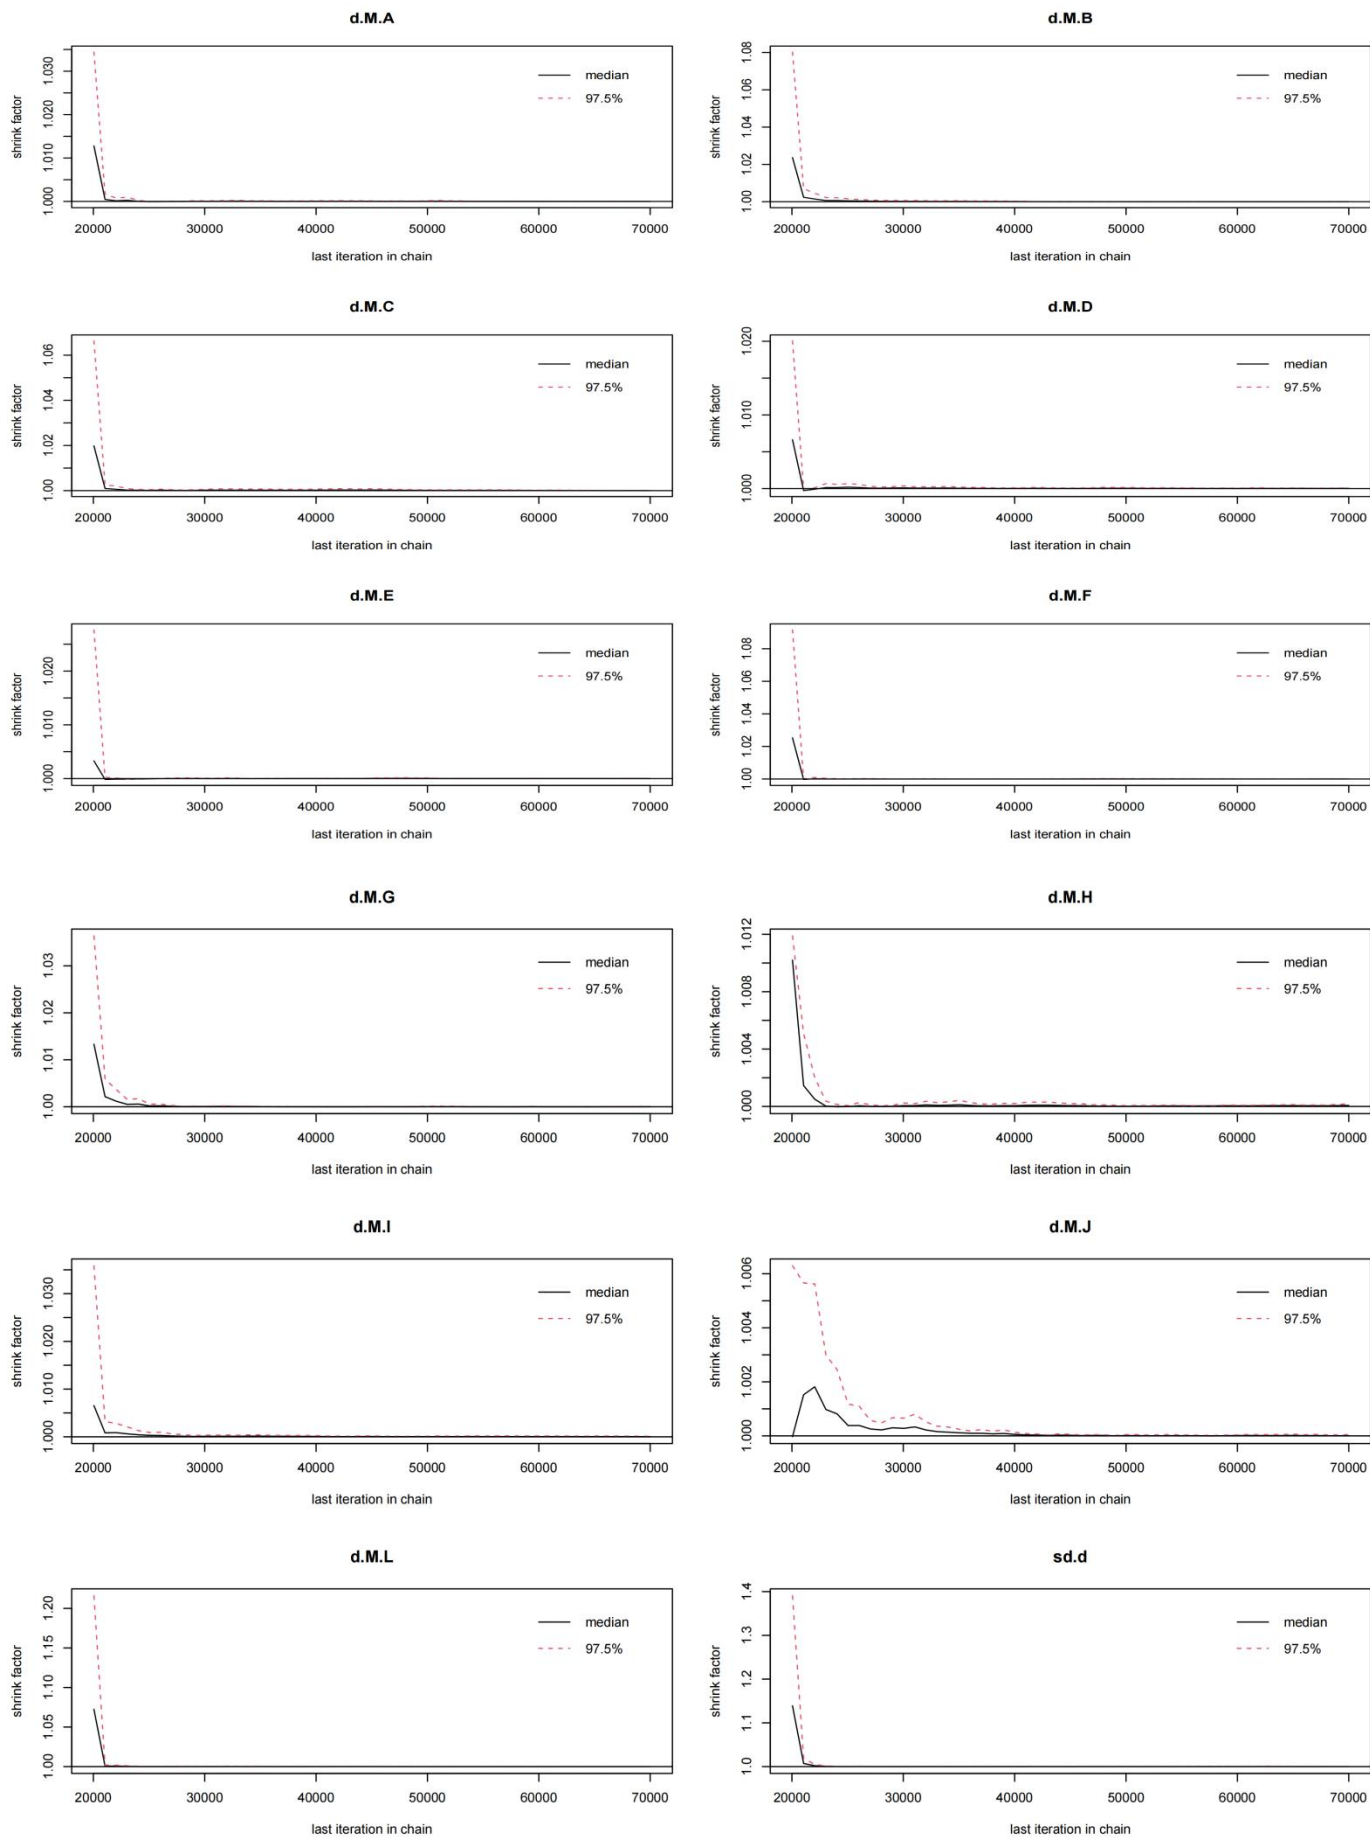

### 3. Urination disorder score

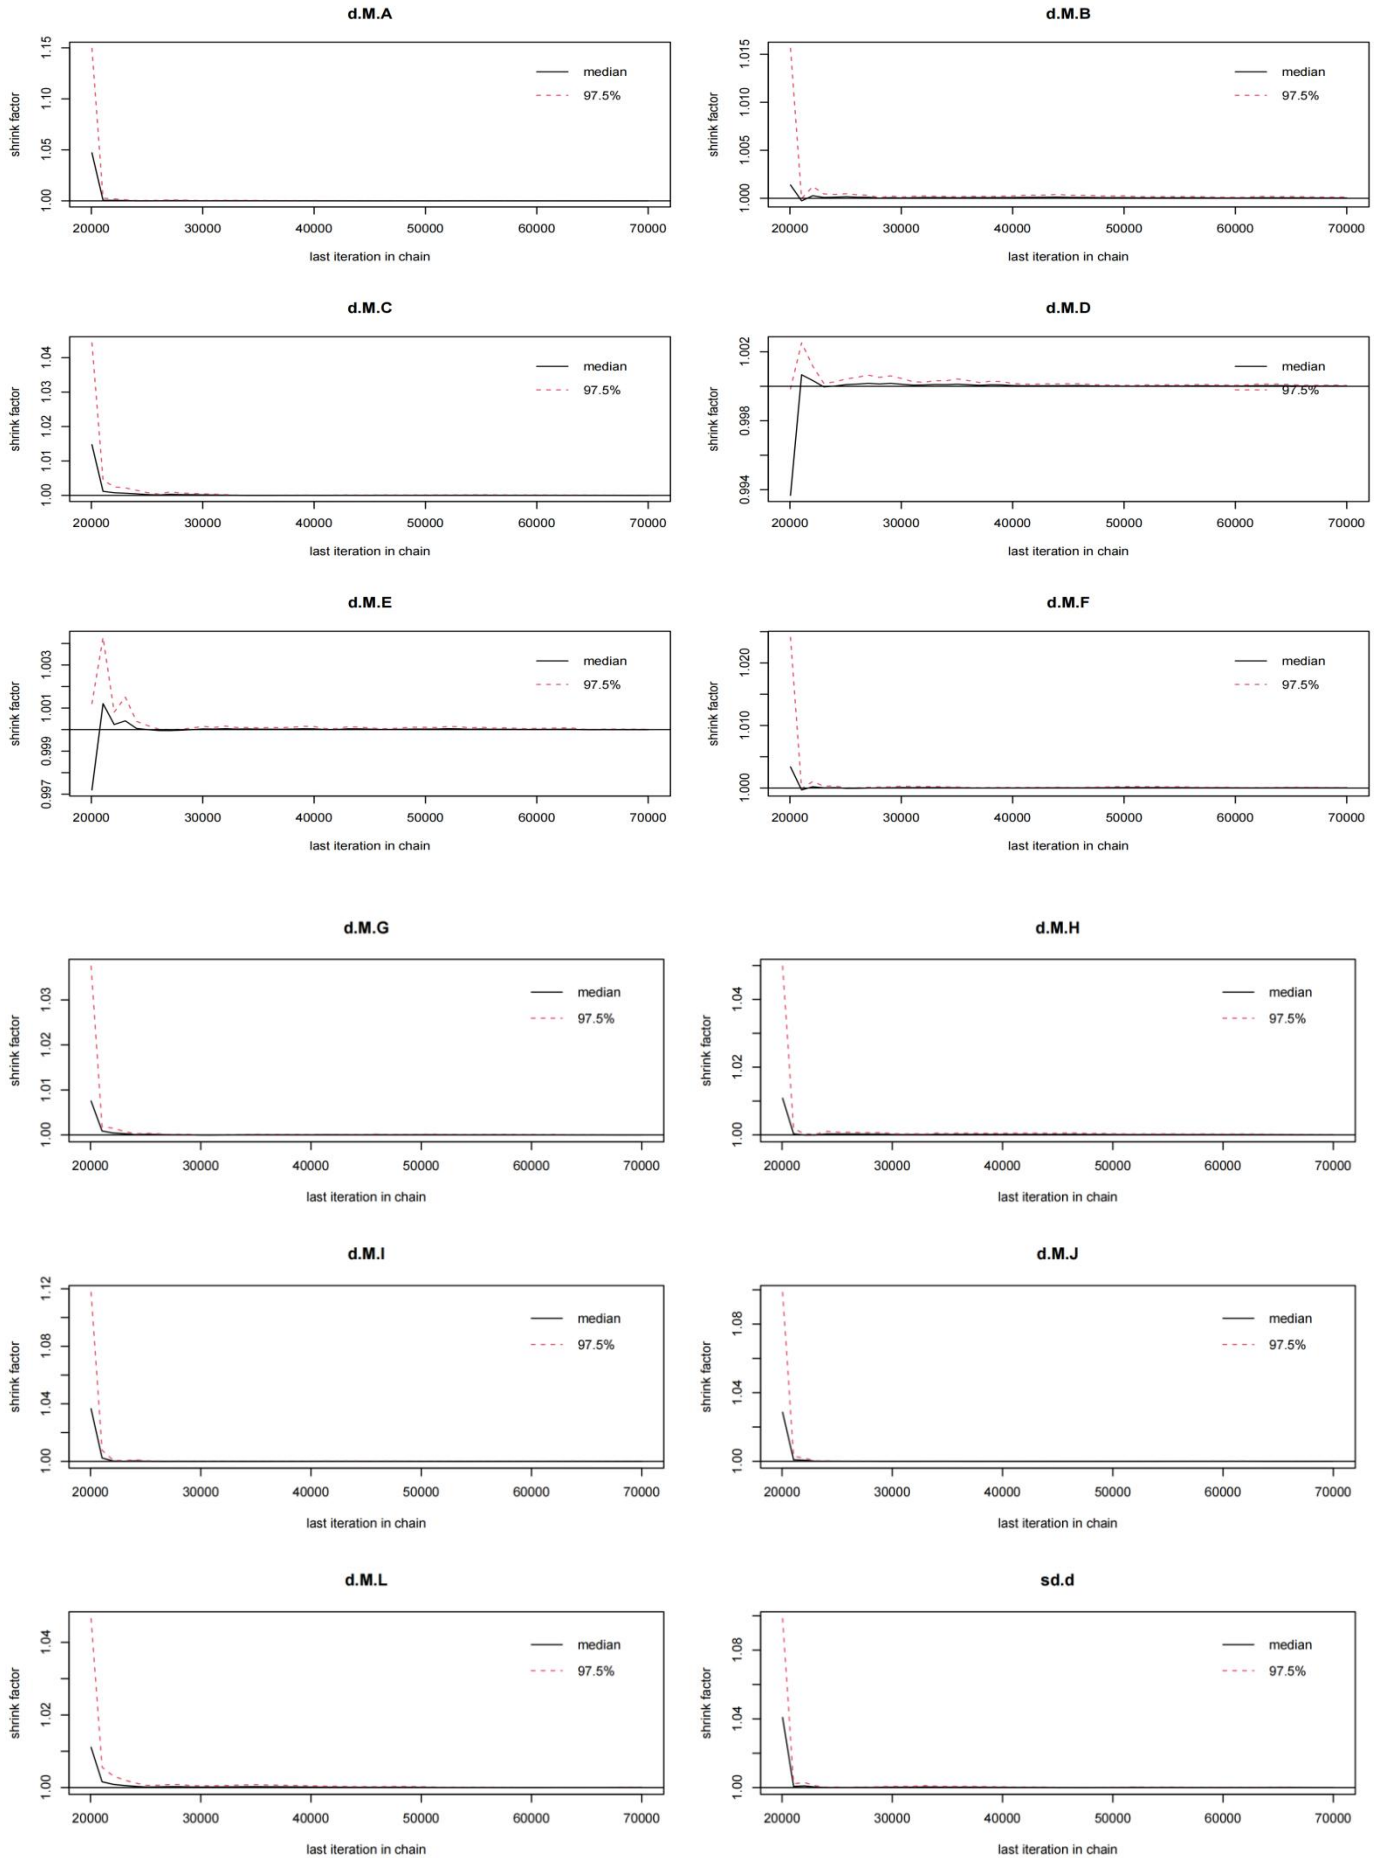

## 4. Quality of life score

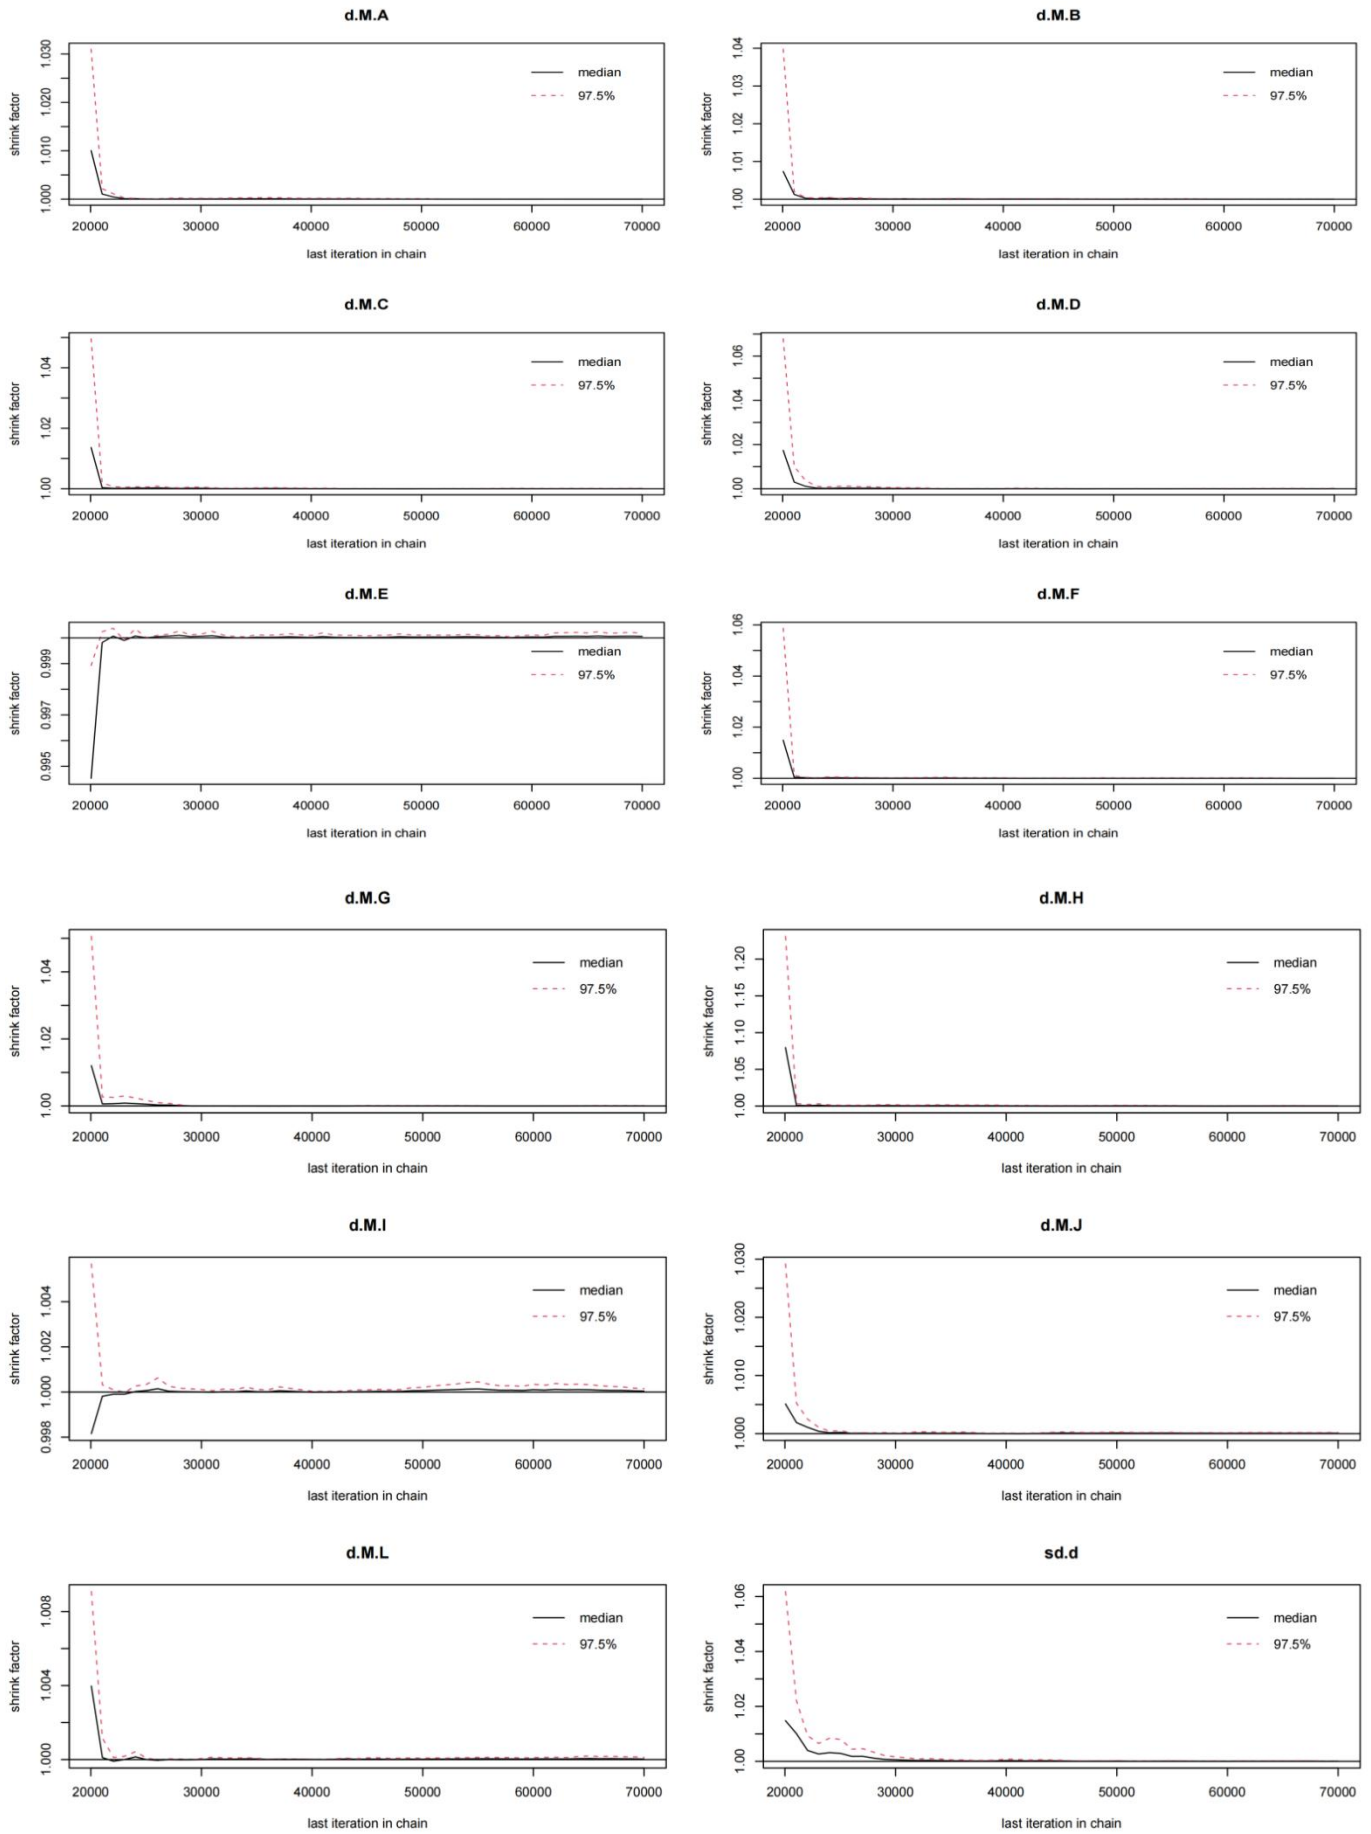

## 5. NIH-CPSI score

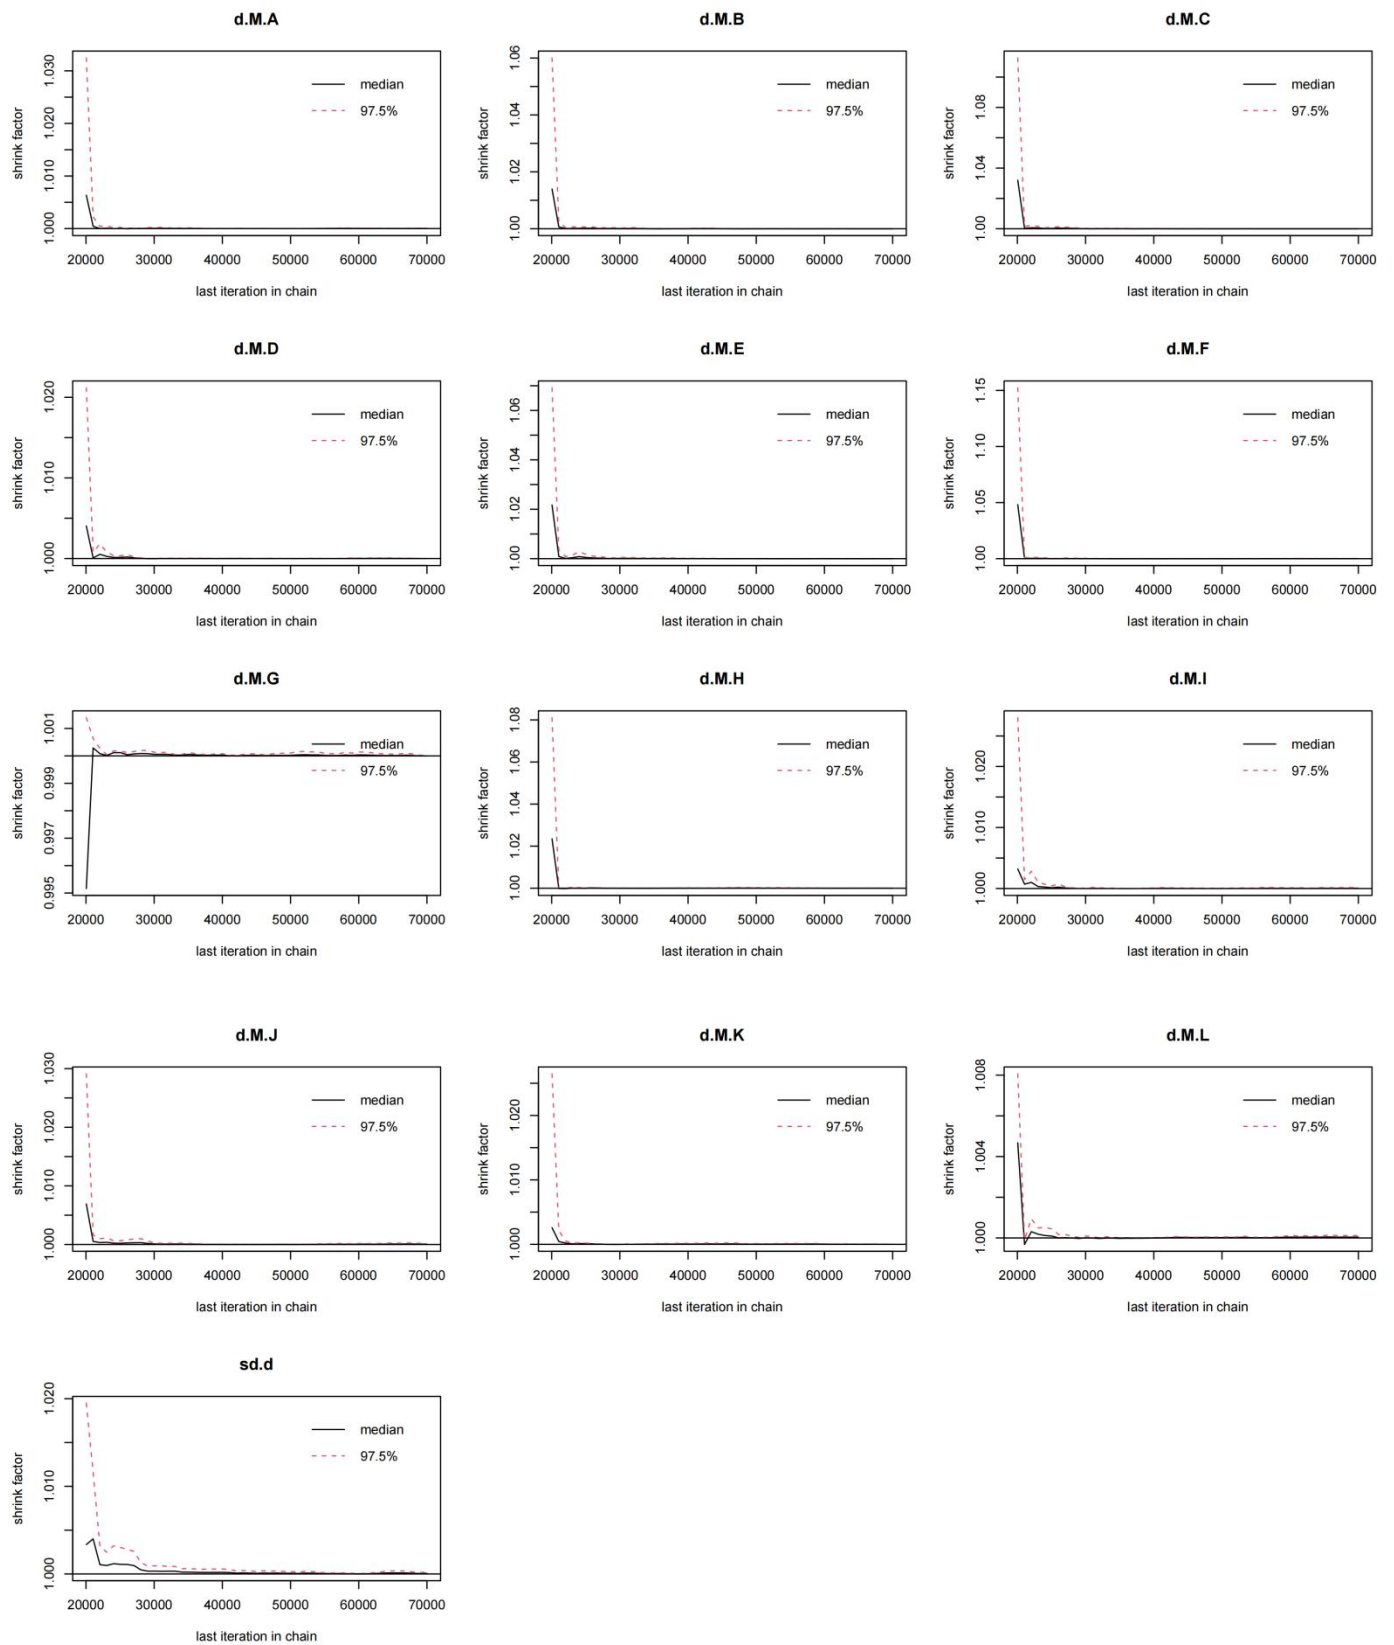

## 6. EPS white blood cell count

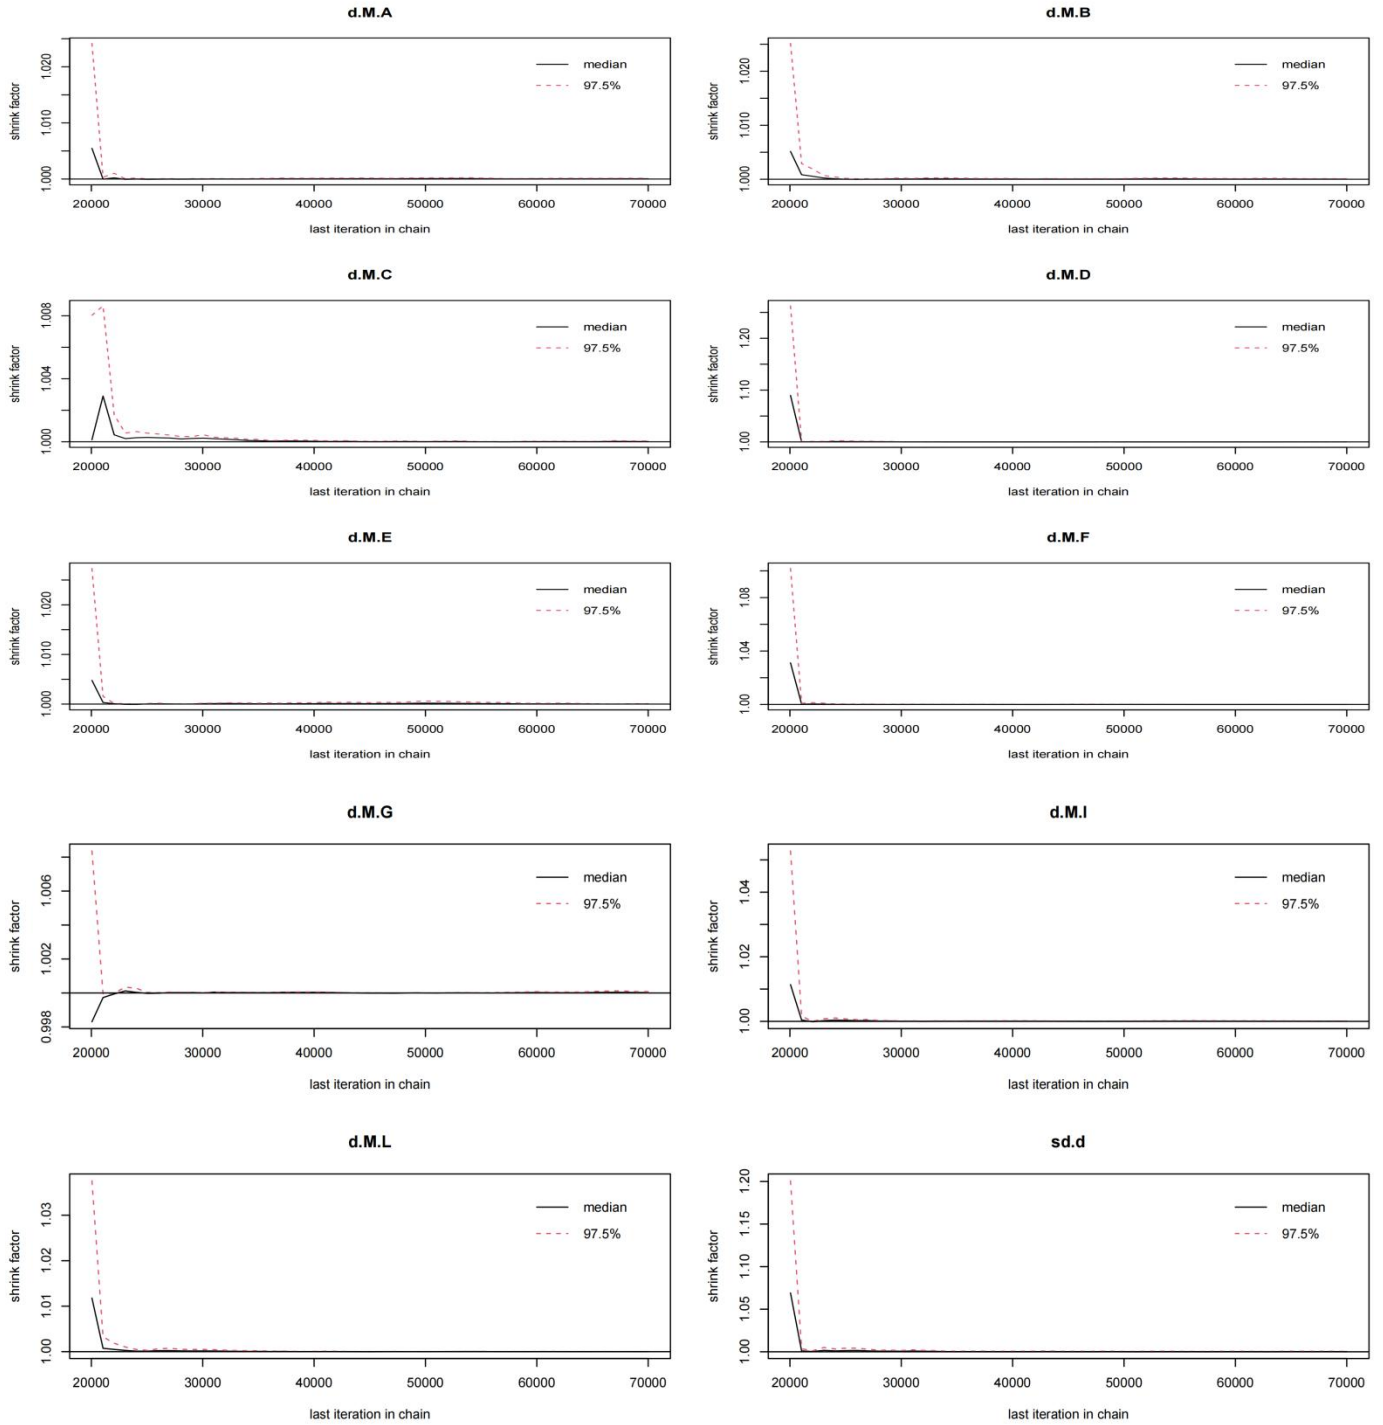

## 7. Adverse events

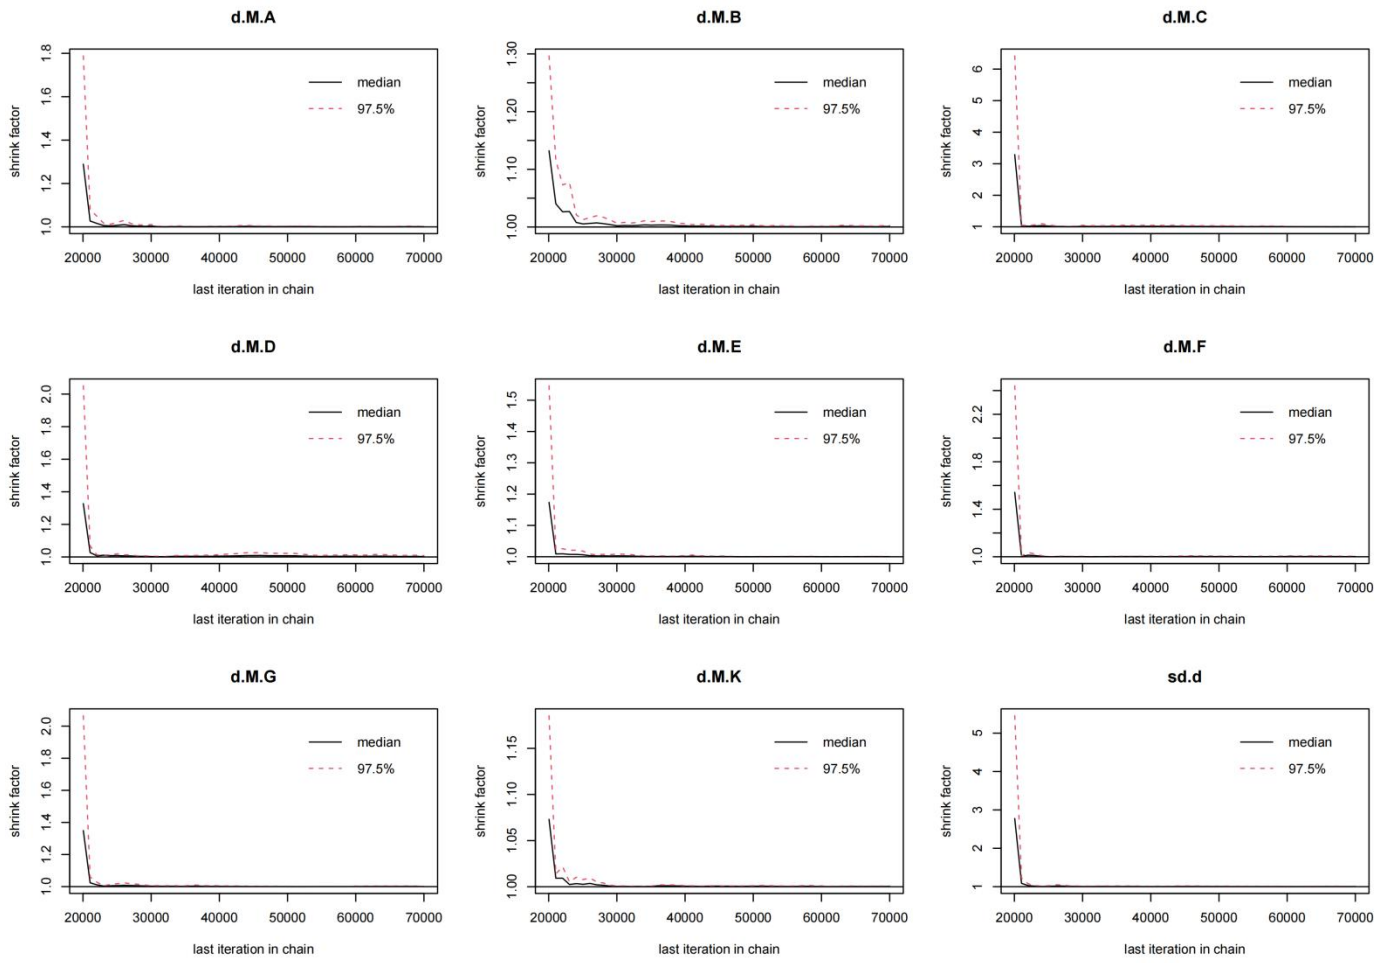

## Appendix 8: CINeMA Assessment

We use the CINeMA framework to evidence certainty, assessing it for each network estimate based on the following criteria:

- **Within study bias:** We classified the overall risk of bias for each study as low risk of bias, the risk of bias as moderate when none of the four assessed risk of bias items were rated as high risk, and the risk of bias as high when one or both items were rated as high risk. See **Appendix 4** for the bias assessment. The risk of bias for a pairwise comparison of each drug is shown in **figure S1-2**.
- **Reporting bias:** We judged it visually by a funnel plot (**Appendix 9**).
- **Indirectness:** Transferability assumptions were assessed by reporting the baseline duration and follow-up in the included study population and by comparing age at baseline concordance between groups.
- **Imprecision:** We use the CINeMA website to grade the accuracy of each comparison.
- **Heterogeneity:** We assessed the degree of worry by comparing clinical reasoning based on 95% confidence intervals (CIs) while applying the same clinical reasoning framework as for inaccuracy. In particular, we judged the consistency of our findings based on the confidence and prediction intervals associated with clinically important effect sizes. And we used the same thresholds of clinical significance as described above and followed the recommendations automatically provided by CINeMA (<https://cinema.ispm.unibe.ch/>).

Figure S1: Risk of bias contribution by intervention group in **total effective rate**

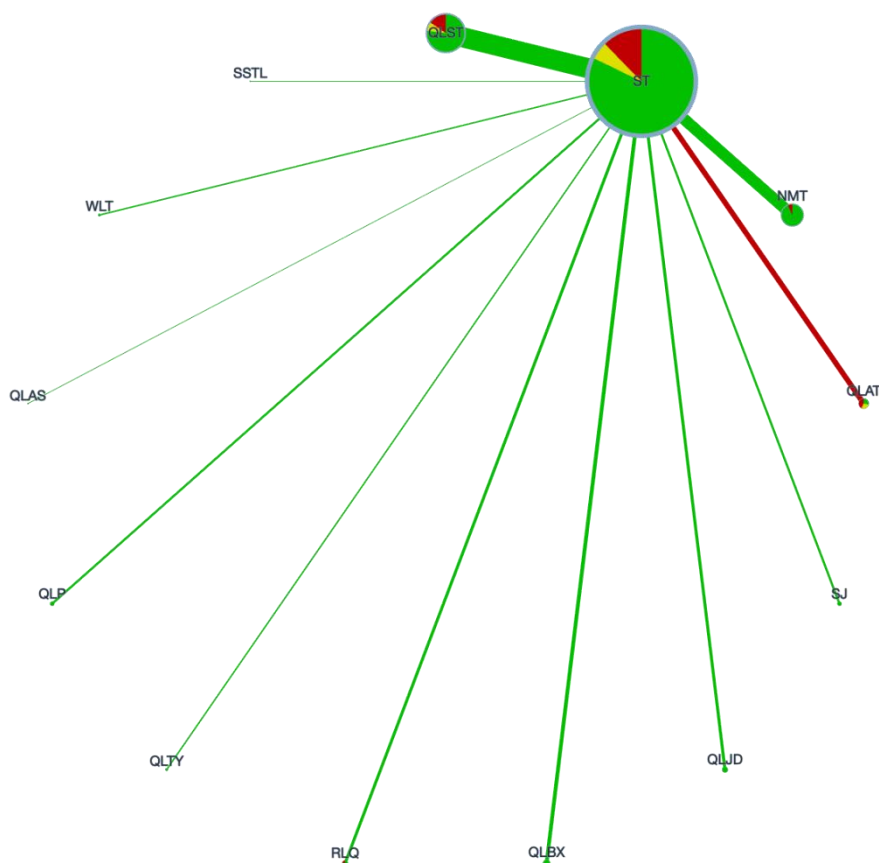

**Abbreviation:** QLST: Qianlie Shutong Capsules; NMT: Ningmitai Capsules; QLAT: Qianlie Antong Tablets/Capsules; SJ: Sanjin Tablets; QLJD: Qianlie Jiedu Capsules; QLBX: Qianlie Beixi Capsules; RLQ: Relinqing Granules; QLTY: Qianlie Tongyu Capsules; QLP: Qianlieping Capsules; QLAS: Qianlie Anshuan Tablets; WLT: Wenglitong Capsules; SSTL: Shuangshi Tonglin Capsules; ST: Standard treatment.

Figure S2: Overall risk of bias by treatment comparison in **total effective rate**

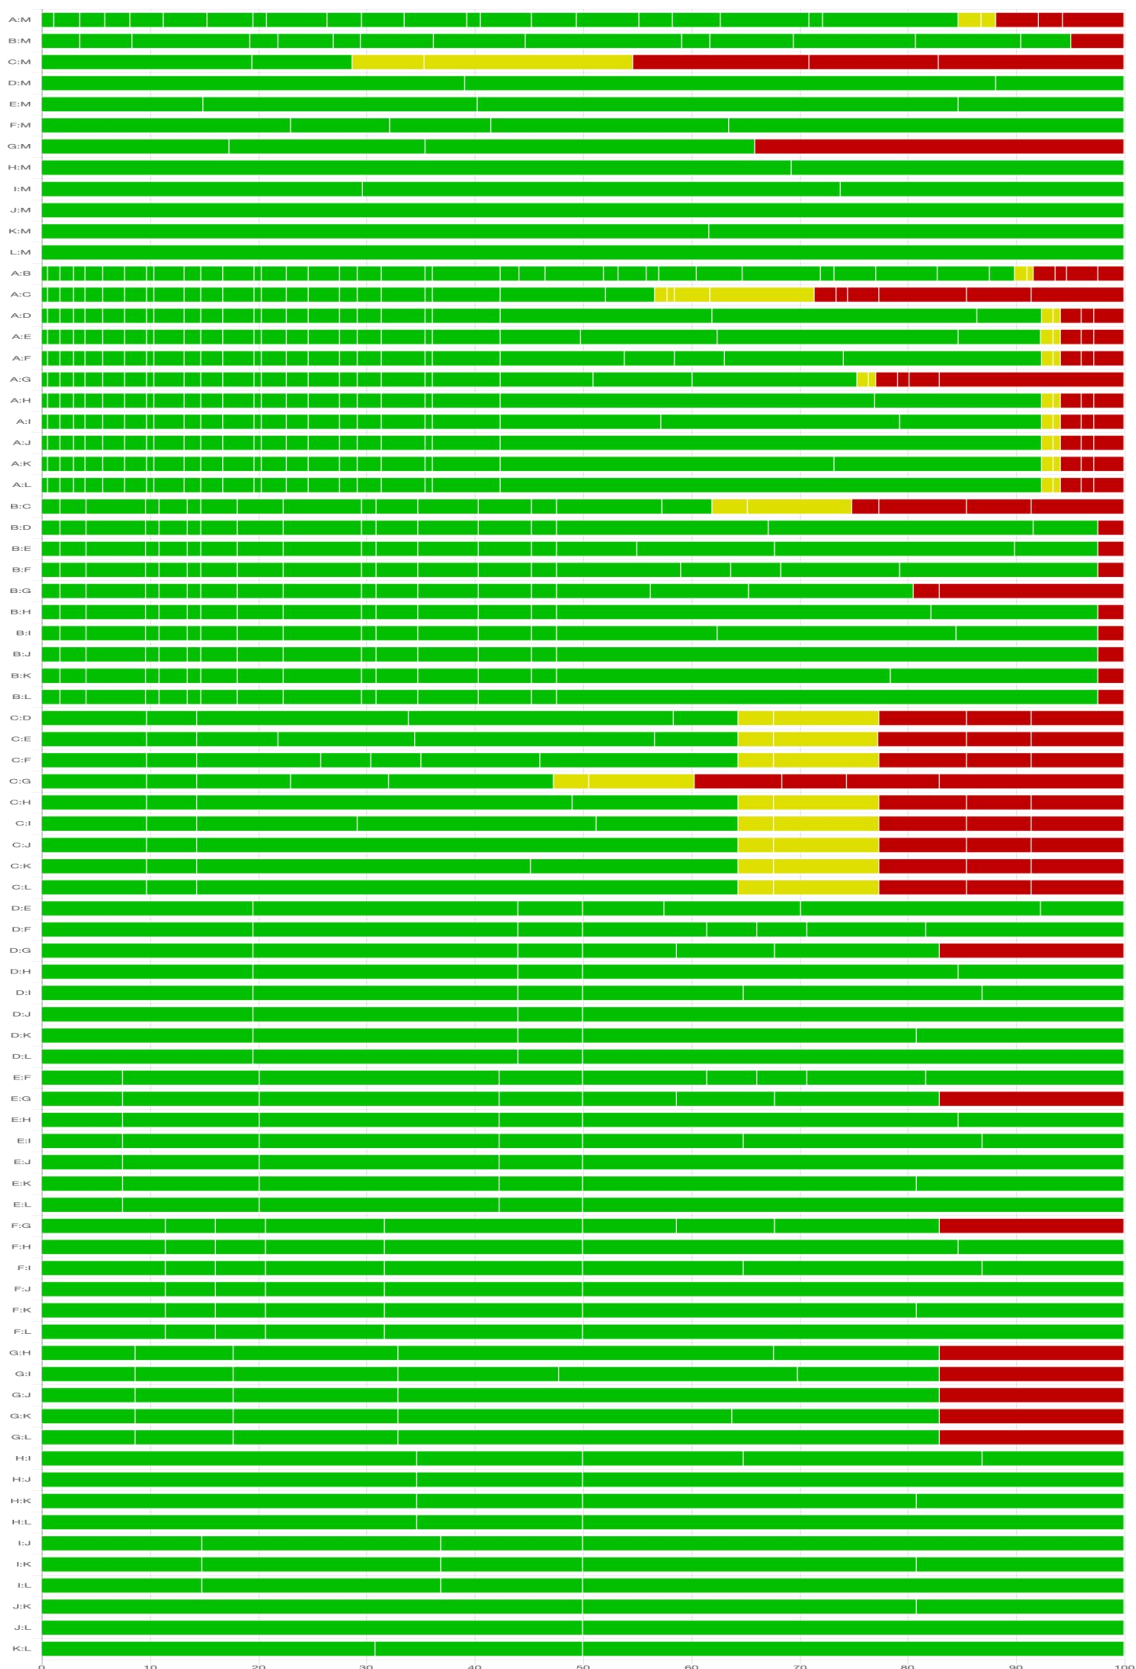

**Abbreviation:** A: Qianlie Shutong Capsules; B: Ningmitai Capsules; C: Qianlie Antong Tablets/Capsules; D: Sanjin Tablets; E: Qianlie Jiedu Capsules; F: Qianlie Beixi Capsules; G: Relinqing Granules; H: Qianlie Tongyu Capsules; I: Qianlieping Capsules; J: Qianlie Anshuan Tablets; K: Wenglitong Capsules; L: Shuangshi Tonglin Capsules; M: Standard treatment.

Table S1: Transitivity (Indirectness) Assessment

| Study            | Age (years)<br>(T/C)  | Duration (year)<br>(T/C) | Follow-up |
|------------------|-----------------------|--------------------------|-----------|
| Wang 2023 [17]   | 31.02±3.46/31.46±3.98 | 3.14±0.70/3.02±0.78      | 12 weeks  |
| Zhang 2023 [18]  | 41.62±3.37/40.27±3.18 | 4.29±1.48/4.07±1.26      | 3 weeks   |
| Qi 2023 [19]     | 50.34±7.44/50.22±7.62 | 2.38±0.74/2.41±0.56      | 8 weeks   |
| Liu 2022a [20]   | 48.12±2.45/47.99±2.51 | 5.22±1.02/5.18±1.04      | 4 weeks   |
| Liu 2022b [21]   | 50.30±8.15/50.23±8.11 | 2.54±0.64/2.51±0.62      | 8 weeks   |
| Zhang 2021 [22]  | 40.49±3.67/40.52±3.54 | 5.12±0.54/5.11±0.16      | 4 weeks   |
| Ba 2021 [23]     | 51.56±5.71/51.63±5.62 | 3.63±0.25/3.57±0.27      | 8 weeks   |
| Wang 2021a [24]  | 34.8±1.1/34.9±1.0     | 2.4±0.1/2.3±0.2          | 4 weeks   |
| Wang 2021b [25]  | 37.53±5.40/38.24±5.64 | NA                       | 8 weeks   |
| Lu 2020 [26]     | 41.2±8.3/41.2±8.3     | 2.37±0.41/2.45±0.47      | 4 weeks   |
| Liu 2020 [27]    | 51.9±3.5/51.3±3.7     | 4.0±0.6/4.2±0.7          | 8 weeks   |
| Wang 2020a [28]  | 32.5±17/35±19         | NA                       | 4 weeks   |
| Zhang 2019 [29]  | 34.13±6.85/34.28±6.21 | NA                       | 8 weeks   |
| Su 2019 [30]     | 38.16±3.01/36.52±2.44 | 3.46±0.41/2.34±0.89      | 4 weeks   |
| Jing 2019 [31]   | 45.1±4.8/46.3±4.5     | 3.52±0.41/3.04±0.29      | 8 weeks   |
| Zeng 2017 [32]   | 41.2±8.3/40.3±9.7     | 2.37±0.41/40.3±9.7       | 4 weeks   |
| Wu 2017a [33]    | 48.72±4.72/48.73±4.74 | NA                       | 4 weeks   |
| Cai 2017 [34]    | 42.73±6.35/44.01±5.05 | 7.94±0.85/7.59±0.72      | 4 weeks   |
| Yu 2016 [35]     | 34.6±6.8/35.9±7.1     | NA                       | 4 weeks   |
| Sang 2016 [36]   | 35.2±3.4/35.6±3.2     | 8.6±2.4/8.7±2.6          | 4 weeks   |
| Chang 2015 [37]  | 48.7±8.9/47.9±9.0     | 7.9±4.5/7.6±4.2          | 4 weeks   |
| Zhang 2015a [38] | 35.22±4.61/35.47±4.22 | 4.36±1.11/4.17±1.06      | 8 weeks   |
| He 2014 [39]     | 34.8                  | 2.3                      | 4 weeks   |
| Zhu 2013 [40]    | NA                    | NA                       | 4 weeks   |
| Xiao 2013 [41]   | 30.5±1.2              | 13.2±2.8                 | 4 weeks   |
| Liu 2012 [42]    | 33.3±5.8/34.7±5.2     | 1.5-12/2-13              | 4 weeks   |
| Wang 2022 [43]   | 67.87±4.41/67.43±5.07 | NA                       | 4 weeks   |
| Lin 2022 [44]    | 56.22±3.51/52.52±3.62 | 6.44±1.35/6.22±1.24      | 8 days    |
| Liu 2021 [45]    | 32/28                 | 6~15/5~12                | 8 weeks   |
| Yi 2021 [46]     | 45.5±2.3/45.6±2.7     | 5.55±2.44/5.68±2.15      | 4 weeks   |
| Han 2021 [47]    | 41.38±6.45/40.89±8.66 | NA                       | 8 weeks   |
| Zhou 2021a [48]  | 45.42±11.20           | NA                       | 2 weeks   |
| Qian 2020 [49]   | 43.6±1.3/44.0±1.4     | 3.86±1.23/3.79±1.16      | 3 weeks   |
| Zhao 2020 [50]   | 49.6±7.4/49.4±7.2     | 3.5±0.7/3.4±0.2          | 2 weeks   |
| Peng 2019 [51]   | 35.39±5.37/37.05±7.03 | 2.42±1.04/2.33±0.98      | 4 weeks   |
| Liu 2018 [52]    | 36.58±4.83/36.64±4.79 | 3.24±0.76/3.29±0.73      | 2 weeks   |
| Ma 2017 [53]     | 42.38±5.46/42.97±5.14 | 2.18±0.45/2.24±0.51      | 4 weeks   |
| Mei 2017 [54]    | 52.2±13.5/54.1±10.3   | NA                       | 4 weeks   |
| Chen 2016 [55]   | 38.26±8.34/38.28±8.52 | NA                       | 2 weeks   |
| Su 2016 [56]     | 31.48±4.69/32.75±4.26 | 7.4±0.6/6.7±0.8          | 4 weeks   |
| Zhou 2015 [57]   | 45.1±16.9             | NA                       | 4 weeks   |
| Luo 2018 [58]    | 30.22±6.53/30.31±6.61 | NA                       | 8 weeks   |

|                  |                       |                     |          |
|------------------|-----------------------|---------------------|----------|
| Li 2017 [59]     | 34.6±12.7/34.0±11.4   | NA                  | 8 weeks  |
| Zhang 2016 [60]  | 36.1±13.2/34.6±12.5   | NA                  | 12 weeks |
| Li 2015 [61]     | 43.9±5.2              | 1.6±0.5             | 4 weeks  |
| Liu 2014a [62]   | 45.7±5.4/46.3±5.2     | 3.9±1.8/3.7±2.0     | 4 weeks  |
| Zhang 2011 [63]  | 30.64±8.62/31.34±9.6  | 2.42±1.93/2.38±1.85 | 4 weeks  |
| Sun 2008 [64]    | 31.6                  | 1.4                 | 4 weeks  |
| Fan 2015 [65]    | 29.1±7.9              | 3.5±2.8             | 12 weeks |
| Jiang 2009 [66]  | 33±1.9/34±2.1         | 26±2.5/25±2.4       | 4 weeks  |
| Li 2009 [67]     | 36.3±6.7/35.8±8.7     | NA                  | 4 weeks  |
| Wu 2017b [68]    | 37.9±9.1/38.6±9.2     | 2.2±0.7/2.1±0.6     | 4 weeks  |
| Qiao 2013 [69]   | 19-44                 | NA                  | 4 weeks  |
| Qiao 2012 [70]   | 31.4                  | 3~11                | 4 weeks  |
| Ji 2010 [71]     | 33.5                  | 6                   | 4 weeks  |
| Xu 2010 [72]     | 30.6±8.2/30.5±8.3     | 3.4±2.5/3.3±2.4     | 4 weeks  |
| Cao 2023 [73]    | 35.13±10.6/35.13±10.2 | NA                  | 4 weeks  |
| Wang 2018 [74]   | 31.1±0.1/30.3±0.2     | NA                  | 4 weeks  |
| Luo 2022 [75]    | 55.14±1.02/54.25±1.13 | NA                  | 4 weeks  |
| Liu 2014b [76]   | 32.65/33.1            | 3.45/13.45          | 4 weeks  |
| Qin 2009 [77]    | 32.1                  | 3 - 11              | 4 weeks  |
| Sun 2021 [78]    | 35.89±6.10/35.10±6.37 | 9.36±2.07/9.10±2.21 | 4 weeks  |
| Nan 2021 [79]    | 47.88±4.56/47.13±4.02 | 6.83±1.20/6.56±1.32 | 4 weeks  |
| Wang 2020b [80]  | 45.77±5.45/45.90±5.23 | NA                  | 2 weeks  |
| Xu 2018 [81]     | 34.06±6.21/33.93±6.45 | 7.45±1.36/7.58±1.31 | 4 weeks  |
| Zheng 2015 [82]  | 32±4.7                | 0.5±0.3             | 4 weeks  |
| Zhu 2011 [83]    | 31.4/30.8             | 3.8/3.5             | 4 weeks  |
| Wu 2014 [84]     | 35.3±8.4/36.1±8.7     | 21.3±6.4/21.6±6.2   | 4 weeks  |
| Zhu 2014 [85]    | 34.17±8.59/34.62±9.17 | 9.52±3.16/9.12±2.93 | 8 weeks  |
| Cheng 2016 [86]  | 41.82±5.78/42.79±5.13 | 2.10±0.54/1.91±0.42 | 8 weeks  |
| Zhang 2015b [87] | 34.65±7.3/34.60±7.8   | NA                  | 4 weeks  |
| Xu 2014 [88]     | 32±7                  | 5.3±2.1             | 4 weeks  |
| Lin 2015 [89]    | 35.4±4.3/34.2±4.7     | NA                  | 4 weeks  |
| Hao 2012 [90]    | 28±10.3               | 9.1±5.6             | 4 weeks  |
| Zhou 2021b [91]  | 27.4±4.1/28.2±3.6     | NA                  | 4 weeks  |
| Zhu 2016 [92]    | 35.4±12.5/38.4±13.2   | 4.2±2.3/4.5±2.3     | 12 weeks |

Table S2: CINeMA Results of **total effective rate**

| Comparison | Number of studies | Within-study bias | Reporting bias | Indirectness | Imprecision    | Heterogeneity | Incoherence    | Confidence rating |
|------------|-------------------|-------------------|----------------|--------------|----------------|---------------|----------------|-------------------|
| A:M        | 26                | No concerns       | Low risk       | No concerns  | No concerns    | No concerns   | Major concerns | High              |
| B:M        | 15                | No concerns       | Low risk       | No concerns  | No concerns    | No concerns   | Major concerns | High              |
| C:M        | 7                 | Major concerns    | Low risk       | No concerns  | No concerns    | No concerns   | Major concerns | Moderate          |
| D:M        | 3                 | No concerns       | Low risk       | No concerns  | No concerns    | No concerns   | Major concerns | Moderate          |
| E:M        | 4                 | No concerns       | Low risk       | No concerns  | No concerns    | No concerns   | Major concerns | Moderate          |
| F:M        | 5                 | No concerns       | Low risk       | No concerns  | No concerns    | No concerns   | Major concerns | Moderate          |
| G:M        | 4                 | No concerns       | Low risk       | No concerns  | No concerns    | No concerns   | Major concerns | Moderate          |
| H:M        | 2                 | No concerns       | Low risk       | No concerns  | No concerns    | No concerns   | Major concerns | Moderate          |
| I:M        | 3                 | No concerns       | Low risk       | No concerns  | No concerns    | No concerns   | Major concerns | Moderate          |
| J:M        | 1                 | No concerns       | Low risk       | No concerns  | No concerns    | No concerns   | Major concerns | Moderate          |
| K:M        | 2                 | No concerns       | Low risk       | No concerns  | No concerns    | No concerns   | Major concerns | Moderate          |
| L:M        | 1                 | No concerns       | Low risk       | No concerns  | No concerns    | No concerns   | Major concerns | Moderate          |
| A:B        | 0                 | No concerns       | Low risk       | No concerns  | Major concerns | No concerns   | Major concerns | Low               |
| A:C        | 0                 | No concerns       | Low risk       | No concerns  | Major concerns | No concerns   | Major concerns | Low               |
| A:D        | 0                 | No concerns       | Low risk       | No concerns  | Major concerns | No concerns   | Major concerns | Low               |
| A:E        | 0                 | No concerns       | Low risk       | No concerns  | Major concerns | No concerns   | Major concerns | Low               |
| A:F        | 0                 | No concerns       | Low risk       | No concerns  | Major concerns | No concerns   | Major concerns | Low               |
| A:G        | 0                 | No concerns       | Low risk       | No concerns  | Major concerns | No concerns   | Major concerns | Low               |
| A:H        | 0                 | No concerns       | Low risk       | No concerns  | Major concerns | No concerns   | Major concerns | Low               |
| A:I        | 0                 | No concerns       | Low risk       | No concerns  | Major concerns | No concerns   | Major concerns | Low               |
| A:J        | 0                 | No concerns       | Low risk       | No concerns  | Major concerns | No concerns   | Major concerns | Low               |
| A:K        | 0                 | No concerns       | Low risk       | No concerns  | No concerns    | No concerns   | Major concerns | Moderate          |
| A:L        | 0                 | No concerns       | Low risk       | No concerns  | Major concerns | No concerns   | Major concerns | Low               |
| B:C        | 0                 | No concerns       | Low risk       | No concerns  | Major concerns | No concerns   | Major concerns | Low               |
| B:D        | 0                 | No concerns       | Low risk       | No concerns  | Major concerns | No concerns   | Major concerns | Low               |
| B:E        | 0                 | No concerns       | Low risk       | No concerns  | Major concerns | No concerns   | Major concerns | Low               |
| B:F        | 0                 | No concerns       | Low risk       | No concerns  | Major concerns | No concerns   | Major concerns | Low               |



|     |   |             |          |             |                |             |                |     |
|-----|---|-------------|----------|-------------|----------------|-------------|----------------|-----|
| F:G | 0 | No concerns | Low risk | No concerns | Major concerns | No concerns | Major concerns | Low |
| F:H | 0 | No concerns | Low risk | No concerns | Major concerns | No concerns | Major concerns | Low |
| F:I | 0 | No concerns | Low risk | No concerns | Major concerns | No concerns | Major concerns | Low |
| F:J | 0 | No concerns | Low risk | No concerns | Major concerns | No concerns | Major concerns | Low |
| F:K | 0 | No concerns | Low risk | No concerns | Major concerns | No concerns | Major concerns | Low |
| F:L | 0 | No concerns | Low risk | No concerns | Major concerns | No concerns | Major concerns | Low |
| G:H | 0 | No concerns | Low risk | No concerns | Major concerns | No concerns | Major concerns | Low |
| G:I | 0 | No concerns | Low risk | No concerns | Major concerns | No concerns | Major concerns | Low |
| G:J | 0 | No concerns | Low risk | No concerns | Major concerns | No concerns | Major concerns | Low |
| G:K | 0 | No concerns | Low risk | No concerns | Major concerns | No concerns | Major concerns | Low |
| G:L | 0 | No concerns | Low risk | No concerns | Major concerns | No concerns | Major concerns | Low |
| H:I | 0 | No concerns | Low risk | No concerns | Major concerns | No concerns | Major concerns | Low |
| H:J | 0 | No concerns | Low risk | No concerns | Major concerns | No concerns | Major concerns | Low |
| H:K | 0 | No concerns | Low risk | No concerns | Major concerns | No concerns | Major concerns | Low |
| H:L | 0 | No concerns | Low risk | No concerns | Major concerns | No concerns | Major concerns | Low |
| I:J | 0 | No concerns | Low risk | No concerns | Major concerns | No concerns | Major concerns | Low |
| I:K | 0 | No concerns | Low risk | No concerns | Major concerns | No concerns | Major concerns | Low |
| I:L | 0 | No concerns | Low risk | No concerns | Major concerns | No concerns | Major concerns | Low |
| J:K | 0 | No concerns | Low risk | No concerns | Major concerns | No concerns | Major concerns | Low |
| J:L | 0 | No concerns | Low risk | No concerns | Major concerns | No concerns | Major concerns | Low |
| K:L | 0 | No concerns | Low risk | No concerns | Major concerns | No concerns | Major concerns | Low |

**Abbreviation:** A: Qianlie Shutong Capsules(QLST); B: Ningmitai Capsules(NMT); C: Qianlie Antong Tablets/Capsules(QLAT); D: Sanjin Tablets(SJ); E: Qianlie Jiedu Capsules(QLJD); F: Qianlie Beixi Capsules(QLBX); G: Relinqing Granules(RLQ); H: Qianlie Tongyu Capsules(QLTY); I: Qianlieping Capsules(QLP); J: Qianlie Anshuan Tablets(QLAS); K: Wenglitong Capsules(WLT); L: Shuangshi Tonglin Capsules(SSTL); M: Standard treatment.

Appendix 9: Funnel plots

1. total effective rate

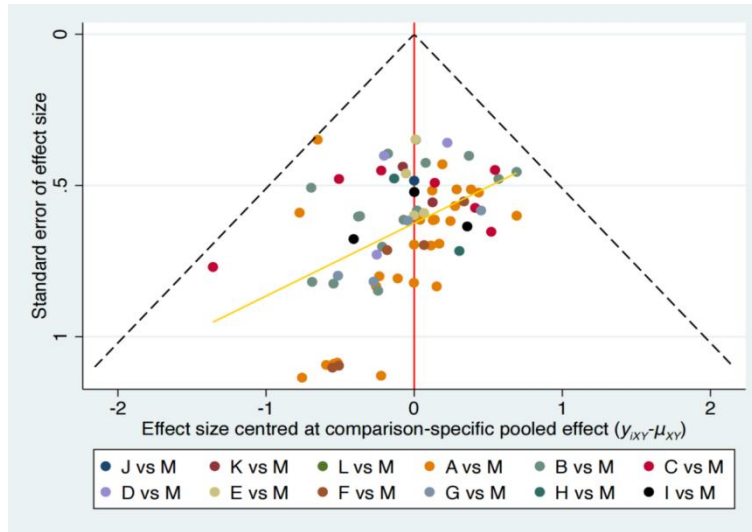

2. Pain symptom score

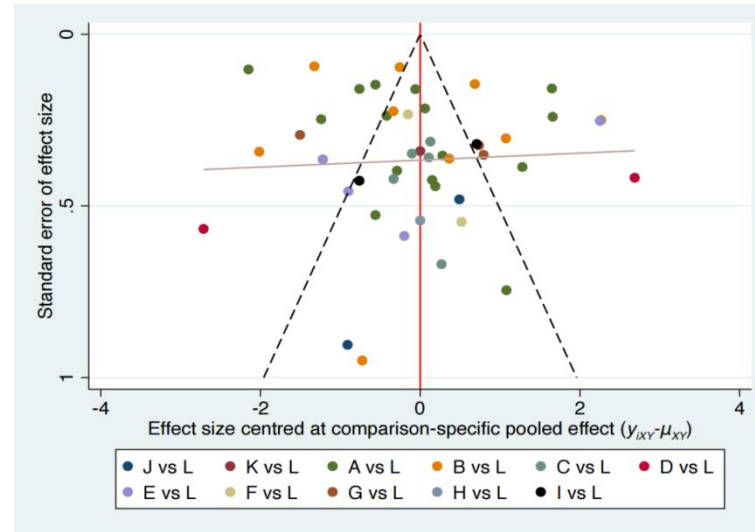

3. Urination disorder score

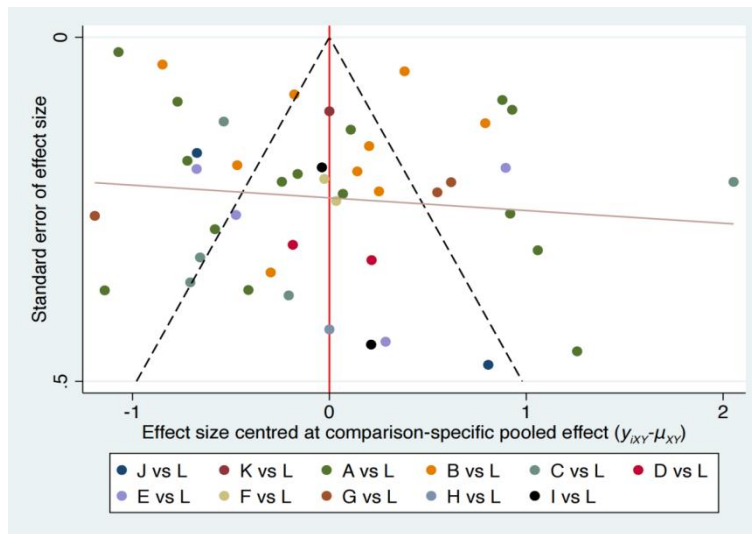

4. Quality of life score

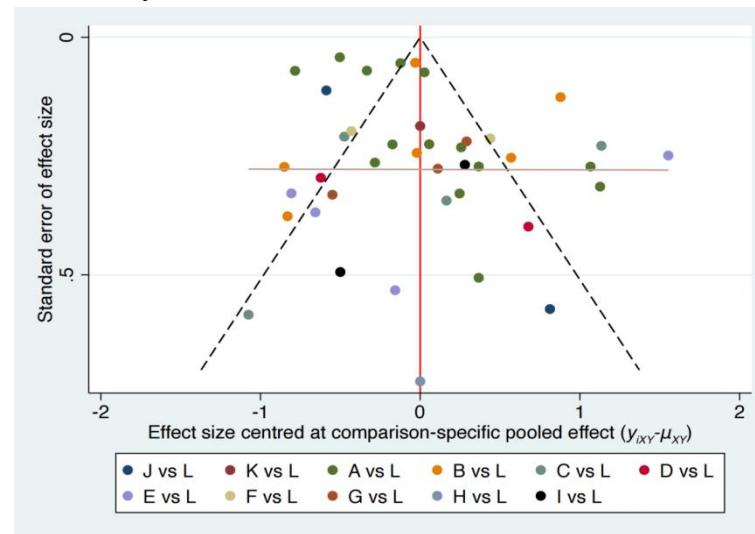

### 5. NIH-CPSI score

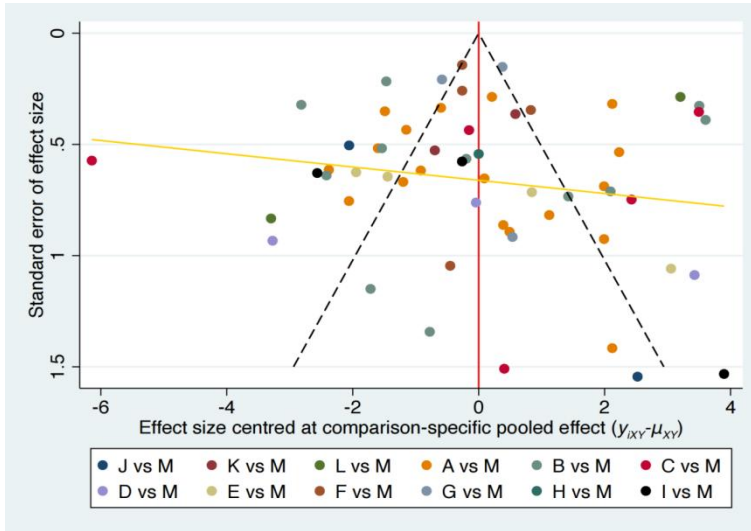

### 6. EPS white blood cell count

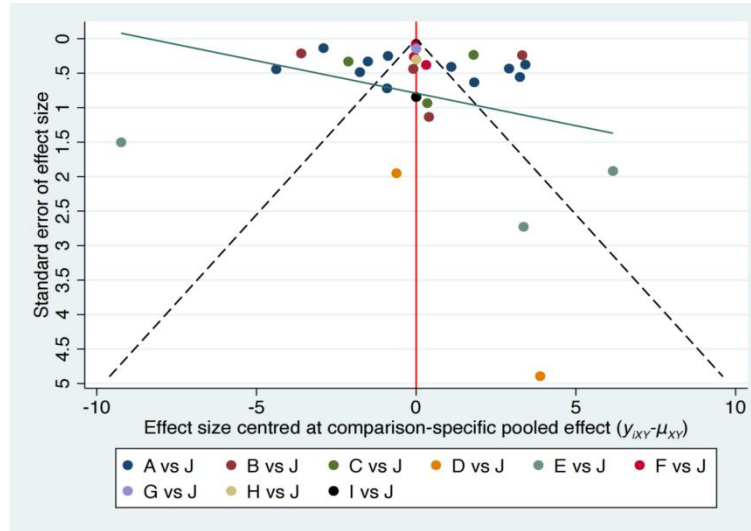

### 7. Adverse events

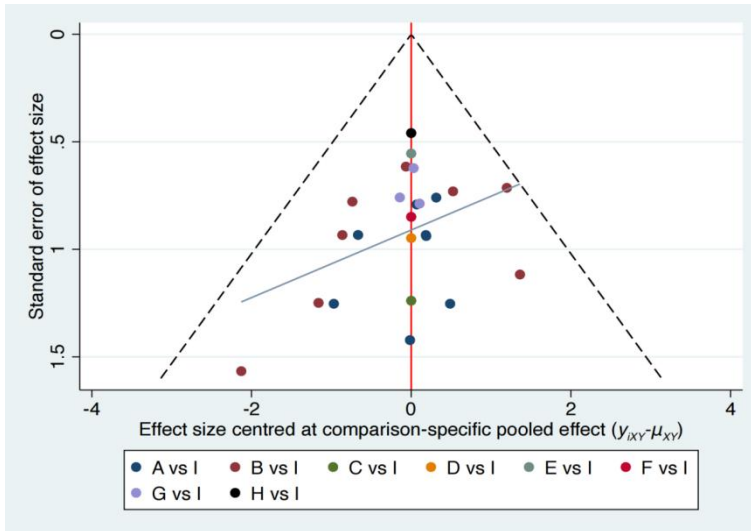

Figure S3: Pain symptom score

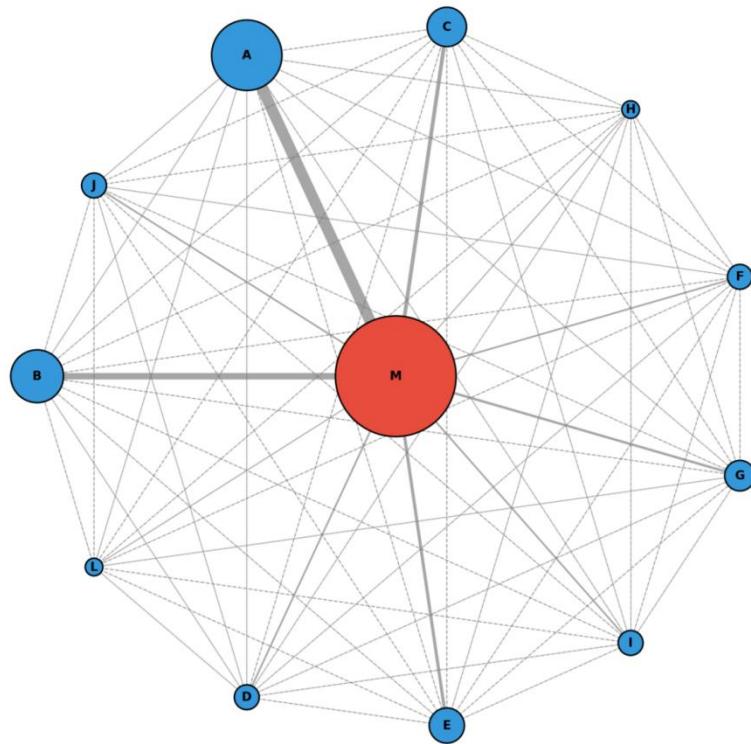

Compared with M

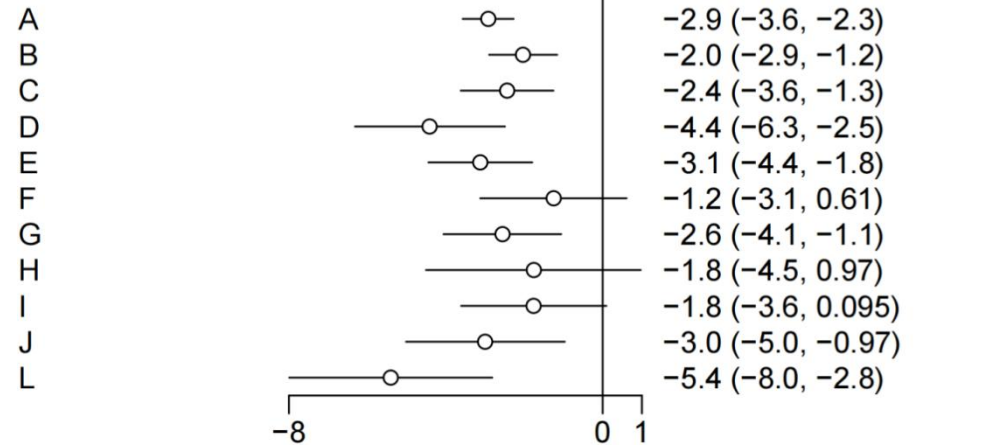

**Abbreviation:** A: Qianlie Shutong Capsules(QLST); B: Ningmitai Capsules(NMT); C: Qianlie Antong Tablets/Capsules(QLAT); D: Sanjin Tablets(SJ); E: Qianlie Jiedu Capsules(QLJD); F: Qianlie Beixi Capsules(QLBX); G: Relinqing Granules(RLQ); H: Qianlie Tongyu Capsules(QLTY); I: Qianlieping Capsules(QLP); J: Qianlie Anshuan Tablets(QLAS); L: Shuangshi Tonglin Capsules(SSTL); M: Standard treatment.

Figure S4: Urination disorder score

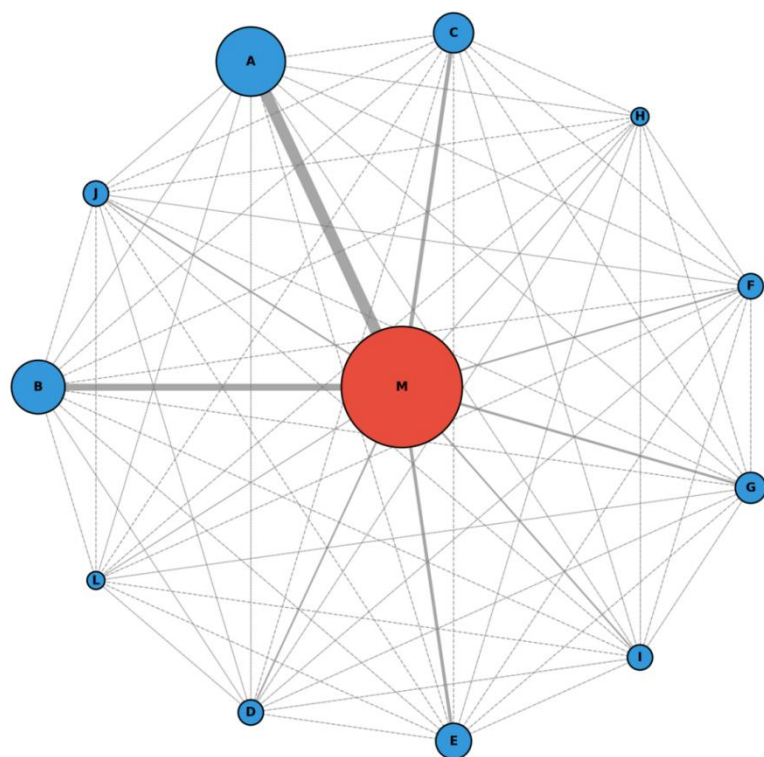

Compared with M

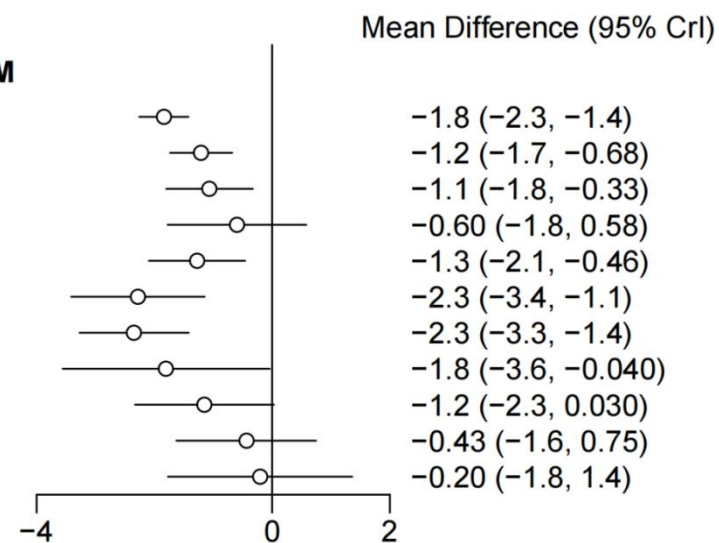

**Abbreviation:** A: Qianlie Shutong Capsules(QLST); B: Ningmitai Capsules(NMT); C: Qianlie Antong Tablets/Capsules(QLAT); D: Sanjin Tablets(SJ); E: Qianlie Jiedu Capsules(QLJD); F: Qianlie Beixi Capsules(QLBX); G: Relinqing Granules(RLQ); H: Qianlie Tongyu Capsules(QLTY); I: Qianlieping Capsules(QLP); J: Qianlie Anshuan Tablets(QLAS); L: Shuangshi Tonglin Capsules(SSTL); M: Standard treatment.

Figure S5: Quality of life score

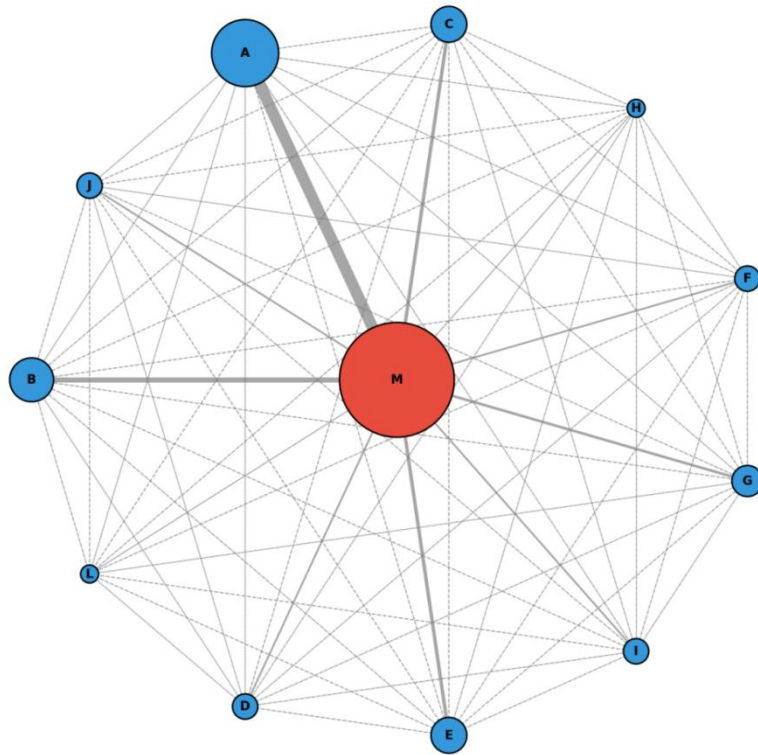

Compared with M

A  
B  
C  
D  
E  
F  
G  
H  
I  
J  
L

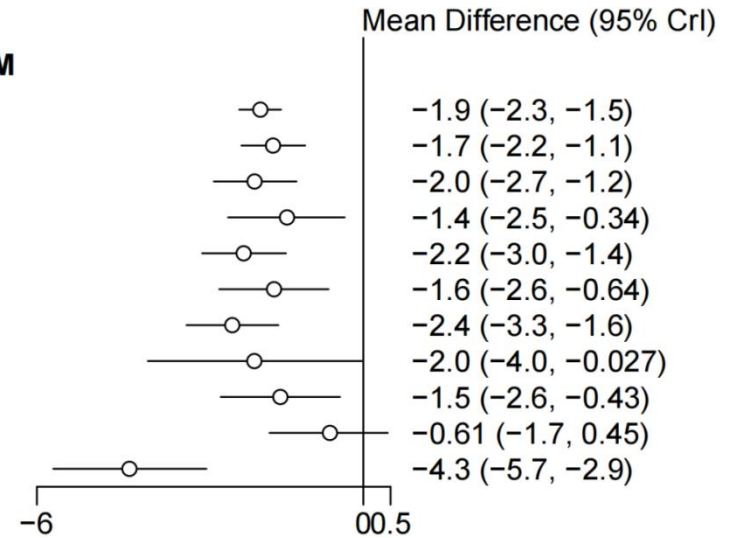

**Abbreviation:** A: Qianlie Shutong Capsules(QLST); B: Ningmitai Capsules(NMT); C: Qianlie Antong Tablets/Capsules(QLAT); D: Sanjin Tablets(SJ); E: Qianlie Jiedu Capsules(QLJD); F: Qianlie Beixi Capsules(QLBX); G: Relinqing Granules(RLQ); H: Qianlie Tongyu Capsules(QLTY); I: Qianlieping Capsules(QLP); J: Qianlie Anshuan Tablets(QLAS); L: Shuangshi Tonglin Capsules(SSTL); M: Standard treatment.

Figure S6: NIH-CPSI score

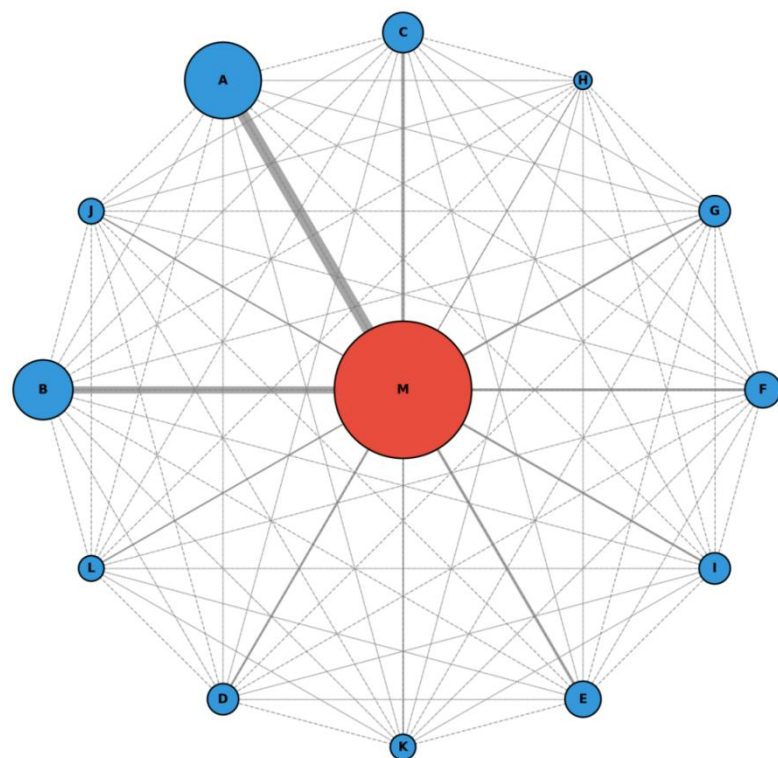

Compared with M

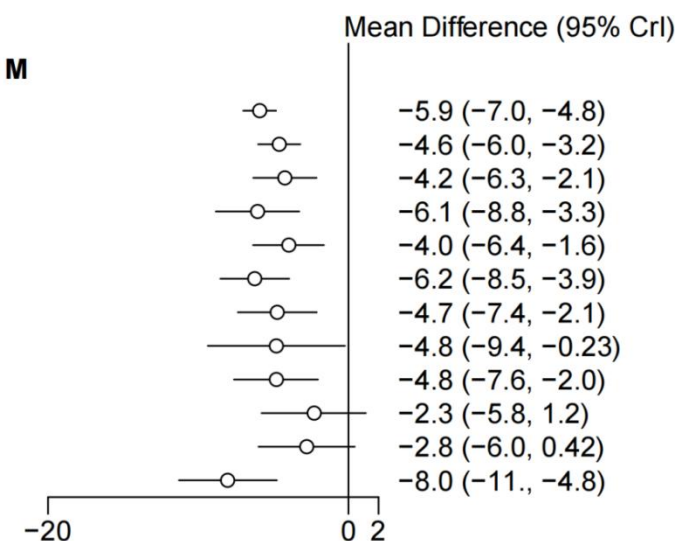

**Abbreviation:** A: Qianlie Shutong Capsules(QLST); B: Ningmitai Capsules(NMT); C: Qianlie Antong Tablets/Capsules(QLAT); D: Sanjin Tablets(SJ); E: Qianlie Jiedu Capsules(QLJD); F: Qianlie Beixi Capsules(QLBX); G: Relinqing Granules(RLQ); H: Qianlie Tongyu Capsules(QLTY); I: Qianlieping Capsules(QLP); J: Qianlie Anshuan Tablets(QLAS); K: Wenglitong Capsules(WLT); L: Shuangshi Tonglin Capsules(SSTL); M: Standard treatment

Figure S7: EPS white blood cell count

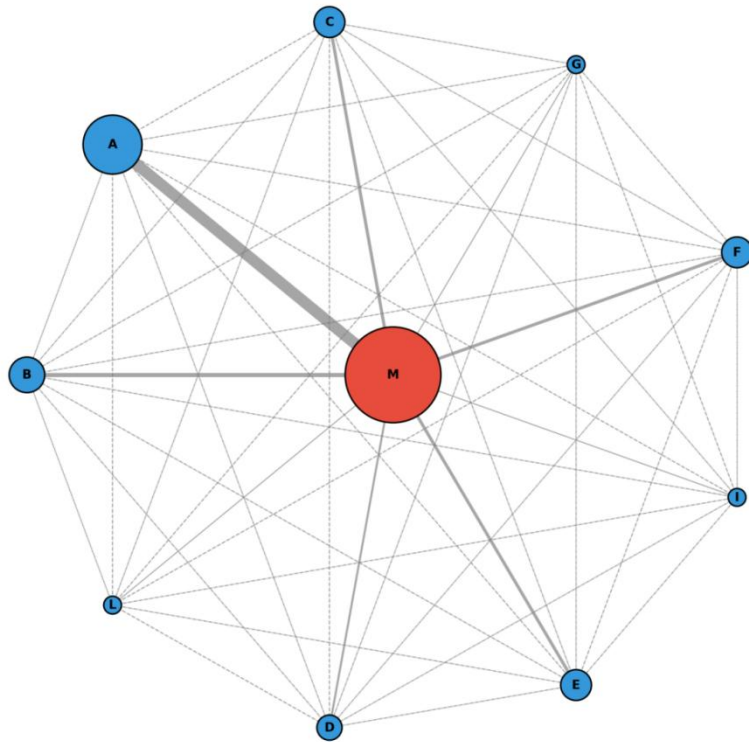

Compared with M

- A
- B
- C
- D
- E
- F
- G
- I
- L

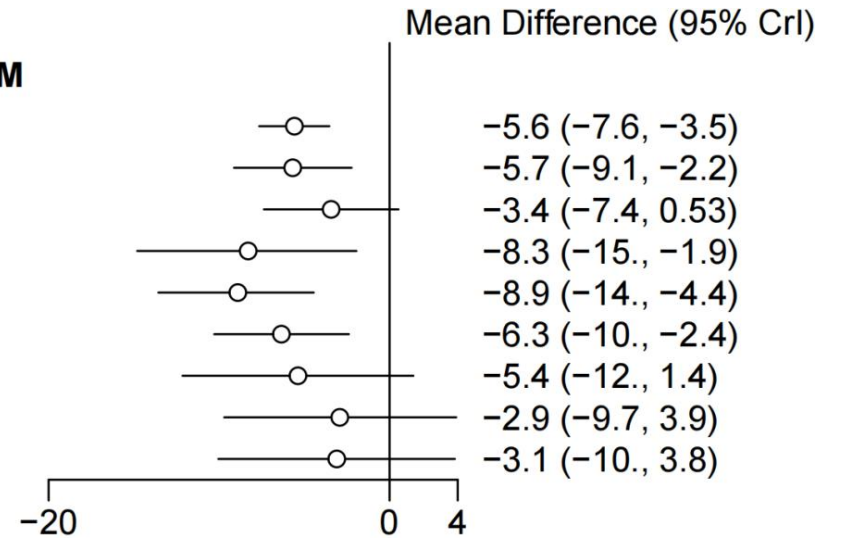

**Abbreviation:** A: Qianlie Shutong Capsules(QLST); B: Ningmitai Capsules(NMT); C: Qianlie Antong Tablets/Capsules(QLAT); D: Sanjin Tablets(SJ); E: Qianlie Jiedu Capsules(QLJD); F: Qianlie Beixi Capsules(QLBX); G: Relinqing Granules(RLQ);I: Qianlieping Capsules(QLP); L: Shuangshi Tonglin Capsules(SSTL); M: Standard treatment.

Figure S8: Adverse events

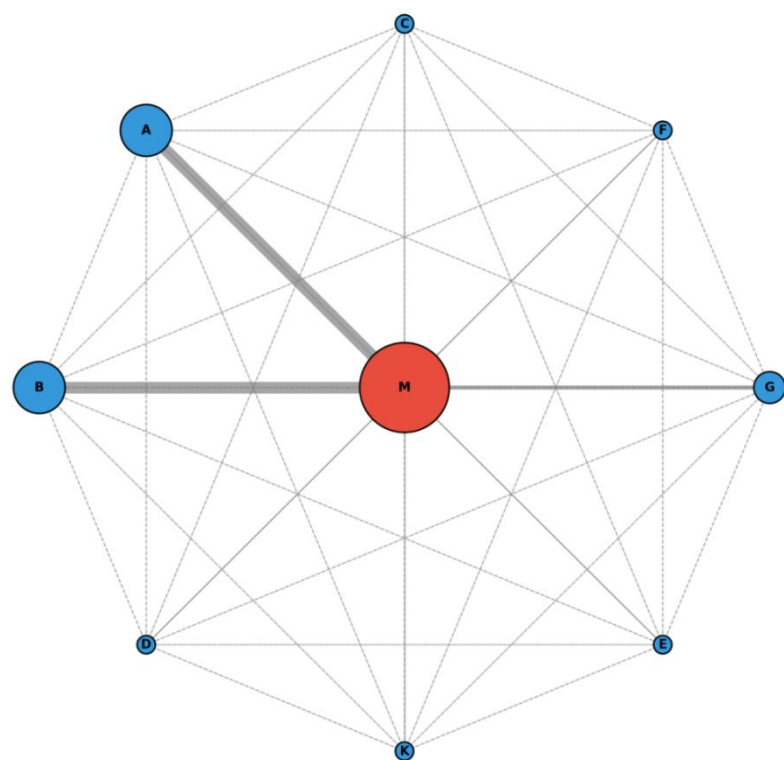

Compared with M

A  
B  
C  
D  
E  
F  
G  
K

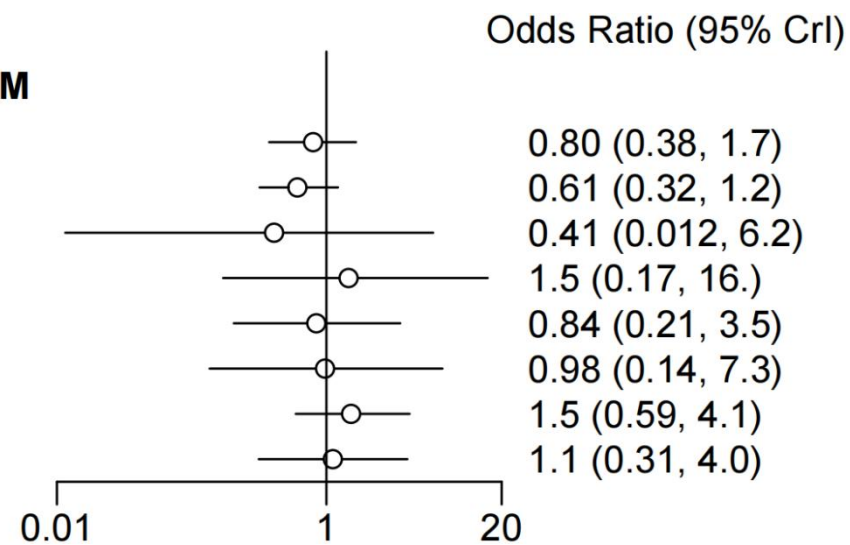

**Abbreviation:** A: Qianlie Shutong Capsules(QLST); B: Ningmitai Capsules(NMT); C: Qianlie Antong Tablets/Capsules(QLAT); D: Sanjin Tablets(SJ); E: Qianlie Jiedu Capsules(QLJD); F: Qianlie Beixi Capsules(QLBX); G: Relinqing Granules(RLQ);K: Wenglitong Capsules(WLT); M: Standard treatment.

## Appendix 11: SUCRA and cumulative probability plots

Table S3: SUCRA of the effects of various Stains on **total effective rate**

| Treatment | SUCRA | PrBest | MeanRank |
|-----------|-------|--------|----------|
| A         | 74.1  | 3.7    | 4.1      |
| B         | 41.2  | 0      | 8.1      |
| C         | 52.5  | 0.9    | 6.7      |
| D         | 29.1  | 0.2    | 9.5      |
| E         | 73    | 10.7   | 4.2      |
| F         | 74.7  | 20.1   | 4        |
| G         | 47.7  | 3.8    | 7.3      |
| H         | 61.4  | 11.7   | 5.6      |
| I         | 52.2  | 4.8    | 6.7      |
| J         | 52.6  | 10     | 6.7      |
| K         | 17.6  | 0.1    | 10.9     |
| L         | 73.8  | 34     | 4.1      |
| M         | 0.2   | 0      | 13       |

**Abbreviation:** A: Qianlie Shutong Capsules(QLST); B: Ningmitai Capsules(NMT); C: Qianlie Antong Tablets/Capsules(QLAT); D: Sanjin Tablets(SJ); E: Qianlie Jiedu Capsules(QLJD); F: Qianlie Beixi Capsules(QLBX); G: Relinqing Granules(RLQ); H: Qianlie Tongyu Capsules(QLTY); I: Qianlieping Capsules(QLP); J: Qianlie Anshuan Tablets(QLAS); K: Wenglitong Capsules(WLT); L: Shuangshi Tonglin Capsules(SSTL); M: Standard treatment.

Table S4: SUCRA of the effects of various Stains on Pain symptom score

| Treatment | SUCRA | PrBest | MeanRank |
|-----------|-------|--------|----------|
| A         | 63.4  | 0.1    | 5        |
| B         | 34.8  | 0      | 8.2      |
| C         | 47.7  | 0.1    | 6.8      |
| D         | 88.6  | 25.1   | 2.3      |
| E         | 67.6  | 1      | 4.6      |
| F         | 21.2  | 0      | 9.7      |
| G         | 51    | 0.3    | 6.4      |
| H         | 33.9  | 0.8    | 8.3      |
| I         | 32    | 0.1    | 8.5      |
| J         | 62.7  | 2.4    | 5.1      |
| L         | 95.3  | 70.1   | 1.5      |
| M         | 1.8   | 0      | 11.8     |

**Abbreviation:** A: Qianlie Shutong Capsules(QLST); B: Ningmitai Capsules(NMT); C: Qianlie Antong Tablets/Capsules(QLAT); D: Sanjin Tablets(SJ); E: Qianlie Jiedu Capsules(QLJD); F: Qianlie Beixi Capsules(QLBX); G: Relinqing Granules(RLQ); H: Qianlie Tongyu Capsules(QLTY); I: Qianlieping Capsules(QLP); J: Qianlie

Anshuan Tablets(QLAS); L: Shuangshi Tonglin Capsules(SSTL); M: Standard treatment

Table S5: SUCRA of the effects of various Stains on Urination disorder score

| Treatment | SUCRA | PrBest | MeanRank |
|-----------|-------|--------|----------|
| A         | 77.7  | 2.1    | 3.4      |
| B         | 50.5  | 0      | 6.4      |
| C         | 44.6  | 0.1    | 7.1      |
| D         | 28.2  | 0.2    | 8.9      |
| E         | 53.6  | 0.4    | 6.1      |
| F         | 88    | 37     | 2.3      |
| G         | 90.6  | 39.4   | 2        |
| H         | 70.5  | 19.5   | 4.2      |
| I         | 48.3  | 1      | 6.7      |
| J         | 22.8  | 0      | 9.5      |
| L         | 17.8  | 0.2    | 10       |
| M         | 7.4   | 0      | 11.2     |

**Abbreviation:** A: Qianlie Shutong Capsules(QLST); B: Ningmitai Capsules(NMT); C: Qianlie Antong Tablets/Capsules(QLAT); D: Sanjin Tablets(SJ); E: Qianlie Jiedu Capsules(QLJD); F: Qianlie Beixi Capsules(QLBX); G: Relinqing Granules(RLQ); H: Qianlie Tongyu Capsules(QLTY); I: Qianlieping Capsules(QLP); J: Qianlie Anshuan Tablets(QLAS); L: Shuangshi Tonglin Capsules(SSTL); M: Standard treatment

Table S6: SUCRA of the effects of various Stains on Quality of life score

| Treatment | SUCRA | PrBest | MeanRank |
|-----------|-------|--------|----------|
| A         | 56.4  | 0      | 5.8      |
| B         | 43.3  | 0      | 7.2      |
| C         | 61.6  | 0.1    | 5.2      |
| D         | 34.8  | 0      | 8.2      |
| E         | 70.9  | 0.1    | 4.2      |
| F         | 44.1  | 0      | 7.1      |
| G         | 78.3  | 0.7    | 3.4      |
| H         | 57.7  | 2.3    | 5.7      |
| I         | 39.3  | 0      | 7.7      |
| J         | 12.6  | 0      | 10.6     |
| L         | 99.6  | 96.7   | 1        |
| M         | 1.3   | 0      | 11.9     |

**Abbreviation:** A: Qianlie Shutong Capsules(QLST); B: Ningmitai Capsules(NMT); C: Qianlie Antong Tablets/Capsules(QLAT); D: Sanjin Tablets(SJ); E: Qianlie Jiedu Capsules(QLJD); F: Qianlie Beixi Capsules(QLBX); G: Relinqing Granules(RLQ); H: Qianlie Tongyu Capsules(QLTY); I: Qianlieping Capsules(QLP); J: Qianlie Anshuan Tablets(QLAS); L: Shuangshi Tonglin Capsules(SSTL); M: Standard treatment

Table S7: SUCRA of the effects of various Stains on NIH-CPSI score

| Treatment | SUCRA | PrBest | MeanRank |
|-----------|-------|--------|----------|
| A         | 74.9  | 1.9    | 4        |
| B         | 48.2  | 0      | 7.2      |
| C         | 42.3  | 0.1    | 7.9      |
| D         | 73.4  | 10.2   | 4.2      |
| E         | 38.4  | 0.2    | 8.4      |
| F         | 77.8  | 10.7   | 3.7      |
| G         | 51.8  | 1.7    | 6.8      |
| H         | 53.1  | 8.1    | 6.6      |
| I         | 52.7  | 2      | 6.7      |
| J         | 19.2  | 0      | 10.7     |
| K         | 23.6  | 0      | 10.2     |
| L         | 93.3  | 65.1   | 1.8      |
| M         | 1.3   | 0      | 12.8     |

**Abbreviation:** A: Qianlie Shutong Capsules(QLST); B: Ningmitai Capsules(NMT); C: Qianlie Antong Tablets/Capsules(QLAT); D: Sanjin Tablets(SJ); E: Qianlie Jiedu Capsules(QLJD); F: Qianlie Beixi Capsules(QLBX); G: Relinqing Granules(RLQ); H: Qianlie Tongyu Capsules(QLTY); I: Qianlieping Capsules(QLP); J: Qianlie Anshuan Tablets(QLAS); K: Wenglitong Capsules(WLT); L: Shuangshi Tonglin Capsules(SSTL); M: Standard treatment.

Table S8: SUCRA of the effects of various Stains on EPS white blood cell count.

| Treatment | SUCRA | PrBest | MeanRank |
|-----------|-------|--------|----------|
| A         | 55.9  | 0.4    | 5        |
| B         | 57.1  | 2.1    | 4.9      |
| C         | 33.1  | 0.2    | 7        |
| D         | 79    | 35.5   | 2.9      |
| E         | 87    | 42.1   | 2.2      |
| F         | 65.2  | 5.8    | 4.1      |
| G         | 53.7  | 9.3    | 5.2      |
| I         | 31    | 2.1    | 7.2      |
| L         | 33.1  | 2.5    | 7        |
| M         | 4.8   | 0      | 9.6      |

**Abbreviation:** A: Qianlie Shutong Capsules(QLST); B: Ningmitai Capsules(NMT); C: Qianlie Antong Tablets/Capsules(QLAT); D: Sanjin Tablets(SJ); E: Qianlie Jiedu Capsules(QLJD); F: Qianlie Beixi Capsules(QLBX); G: Relinqing Granules(RLQ); I: Qianlieping Capsules(QLP); L: Shuangshi Tonglin Capsules(SSTL); M: Standard treatment.

Table S9: SUCRA of the effects of various Stains on Adverse events

| Treatment | SUCRA | PrBest | MeanRank |
|-----------|-------|--------|----------|
| A         | 60.7  | 6      | 4.1      |
| B         | 76.3  | 14.6   | 2.9      |
| C         | 69.4  | 45.6   | 3.4      |
| D         | 34.9  | 8.7    | 6.2      |
| E         | 54.8  | 9.5    | 4.6      |
| F         | 47    | 12.8   | 5.2      |
| G         | 23    | 0.4    | 7.2      |
| K         | 39.4  | 2.4    | 5.9      |
| M         | 44.5  | 0      | 5.4      |

**Abbreviation:** A: Qianlie Shutong Capsules(QLST); B: Ningmitai Capsules(NMT); C: Qianlie Antong Tablets/Capsules(QLAT); D: Sanjin Tablets(SJ); E: Qianlie Jiedu Capsules(QLJD); F: Qianlie Beixi Capsules(QLBX); G: Relinqing Granules(RLQ);K: Wenglitong Capsules(WLT); M: Standard treatment.

Appendix 12: league table of Summary Estimates for CPMs on CP/CPPS Derived from Network Meta-analysis of 76 Trials

Table S10: total effective rate

The league table presents pairwise comparisons between drug classes, with effect estimates shown as ORs and 95% CIs. For example, the OR for **QLST** versus **NMT** in **total effective rate** is 1.40 (95% CI: 0.98–2.00). OR < 1 favors the row drug, while OR > 1 favors the column drug. Certainty of evidence, assessed by CINeMA (\* low, † moderate, ‡ high), is indicated in the table, and detailed results are provided in **Appendix 8**. Red text: 95% CI does not cross zero.

|                     |                     |                     |                     |                     |                     |                     |                     |                     |                     |                     |        |    |  |
|---------------------|---------------------|---------------------|---------------------|---------------------|---------------------|---------------------|---------------------|---------------------|---------------------|---------------------|--------|----|--|
| QLST                |                     |                     |                     |                     |                     |                     |                     |                     |                     |                     |        |    |  |
| 1.40<br>(0.98,2.00) | NMT                 |                     |                     |                     |                     |                     |                     |                     |                     |                     |        |    |  |
| 1.25<br>(0.79,1.98) | 0.89<br>(0.56,1.43) | QLAT                |                     |                     |                     |                     |                     |                     |                     |                     |        |    |  |
| 1.68<br>(0.97,2.91) | 1.20<br>(0.69,2.09) | 1.34<br>(0.72,2.51) | SJ                  |                     |                     |                     |                     |                     |                     |                     |        |    |  |
| 0.99<br>(0.59,1.65) | 0.70<br>(0.42,1.19) | 0.79<br>(0.43,1.43) | 0.59<br>(0.30,1.15) | QLJD                |                     |                     |                     |                     |                     |                     |        |    |  |
| 0.93<br>(0.46,1.87) | 0.66<br>(0.33,1.34) | 0.74<br>(0.35,1.59) | 0.55<br>(0.24,1.25) | 0.94<br>(0.42,2.09) | QLBX                |                     |                     |                     |                     |                     |        |    |  |
| 1.34<br>(0.66,2.72) | 0.96<br>(0.47,1.96) | 1.07<br>(0.49,2.31) | 0.80<br>(0.35,1.82) | 1.36<br>(0.61,3.04) | 1.44<br>(0.57,3.67) | RLQ                 |                     |                     |                     |                     |        |    |  |
| 1.12<br>(0.49,2.53) | 0.80<br>(0.35,1.81) | 0.89<br>(0.37,2.13) | 0.67<br>(0.26,1.67) | 1.13<br>(0.46,2.79) | 1.20<br>(0.44,3.33) | 0.84<br>(0.30,2.33) | QLTY                |                     |                     |                     |        |    |  |
| 1.27<br>(0.62,2.61) | 0.91<br>(0.44,1.87) | 1.01<br>(0.46,2.22) | 0.75<br>(0.33,1.75) | 1.29<br>(0.57,2.91) | 1.37<br>(0.53,3.51) | 0.95<br>(0.37,2.45) | 1.13<br>(0.40,3.19) | QLP                 |                     |                     |        |    |  |
| 1.27<br>(0.48,3.37) | 0.90<br>(0.34,2.42) | 1.01<br>(0.36,2.82) | 0.75<br>(0.26,2.19) | 1.28<br>(0.45,3.67) | 1.36<br>(0.43,4.32) | 0.95<br>(0.30,3.02) | 1.13<br>(0.33,3.86) | 1.00<br>(0.31,3.20) | QLAS                |                     |        |    |  |
| 2.21<br>(1.08,4.53) | 1.58<br>(0.77,3.26) | 1.77<br>(0.81,3.85) | 1.32<br>(0.57,3.04) | 2.24<br>(1.00,5.06) | 2.38<br>(0.93,6.11) | 1.65<br>(0.64,4.27) | 1.98<br>(0.71,5.54) | 1.75<br>(0.67,4.54) | 1.75<br>(0.55,5.60) | WLT                 |        |    |  |
| 0.87<br>(0.31,2.50) | 0.62<br>(0.22,1.79) | 0.70<br>(0.23,2.08) | 0.52<br>(0.17,1.62) | 0.89<br>(0.29,2.71) | 0.94<br>(0.28,3.17) | 0.65<br>(0.19,2.21) | 0.78<br>(0.22,2.82) | 0.69<br>(0.20,2.35) | 0.69<br>(0.17,2.78) | 0.39<br>(0.12,1.34) | SSTL   |    |  |
| 4.64 ‡              | 3.31 ‡              | 3.71 †              | 2.76 ‡              | 4.70 ‡              | 5.00 ‡              | 3.47 ‡              | 4.15 ‡              | 3.66 ‡              | 3.67 ‡              | 2.10 ‡              | 5.31 ‡ | ST |  |

|             |             |             |             |             |             |             |             |             |             |             |              |  |
|-------------|-------------|-------------|-------------|-------------|-------------|-------------|-------------|-------------|-------------|-------------|--------------|--|
| (3.64,5.91) | (2.56,4.30) | (2.51,5.46) | (1.69,4.52) | (2.99,7.41) | (2.60,9.62) | (1.78,6.75) | (1.91,9.04) | (1.85,7.21) | (1.42,9.47) | (1.07,4.11) | (1.91,14.74) |  |
|-------------|-------------|-------------|-------------|-------------|-------------|-------------|-------------|-------------|-------------|-------------|--------------|--|

Table S11: Pain symptom score

The league table summarizes pairwise comparisons, with effect estimates expressed as MDs and 95% CIs. For example, the MD for **QLST versus NMT** in **pain symptom score** is **-0.88** (95% CI: **-1.97** to **0.20**). An MD > 0 favors the row drug, whereas an MD < 0 favors the column drug. Values shown in red indicate statistically significant differences, where the 95% confidence interval does not cross zero. Red text: 95% CI does not cross zero.

|                             |                             |                             |                             |                             |                          |                             |                     |                          |                             |                             |           |  |
|-----------------------------|-----------------------------|-----------------------------|-----------------------------|-----------------------------|--------------------------|-----------------------------|---------------------|--------------------------|-----------------------------|-----------------------------|-----------|--|
| <b>QLST</b>                 |                             |                             |                             |                             |                          |                             |                     |                          |                             |                             |           |  |
| -0.88 (-1.97, 0.20)         | <b>NMT</b>                  |                             |                             |                             |                          |                             |                     |                          |                             |                             |           |  |
| -0.47 (-1.83, 0.88)         | 0.41 (-1.06, 1.89)          | <b>QLAT</b>                 |                             |                             |                          |                             |                     |                          |                             |                             |           |  |
| 1.50 (-0.53, 3.49)          | <b>2.38 (0.27, 4.47)</b>    | 1.97 (-0.28, 4.19)          | <b>SJ</b>                   |                             |                          |                             |                     |                          |                             |                             |           |  |
| 0.21 (-1.28, 1.67)          | 1.09 (-0.50, 2.68)          | 0.68 (-1.10, 2.44)          | -1.29 (-3.60, 1.04)         | <b>QLJD</b>                 |                          |                             |                     |                          |                             |                             |           |  |
| -1.66 (-3.64, 0.31)         | -0.78 (-2.84, 1.28)         | -1.19 (-3.40, 1.03)         | <b>-3.16 (-5.79, -0.48)</b> | -1.87 (-4.15, 0.42)         | <b>QLBX</b>              |                             |                     |                          |                             |                             |           |  |
| -0.36 (-2.00, 1.25)         | 0.52 (-1.21, 2.24)          | 0.11 (-1.80, 2.01)          | -1.86 (-4.27, 0.55)         | -0.57 (-2.56, 1.43)         | 1.30 (-1.10, 3.69)       | <b>RLQ</b>                  |                     |                          |                             |                             |           |  |
| -1.17 (-3.97, 1.63)         | -0.29 (-3.15, 2.58)         | -0.70 (-3.66, 2.27)         | -2.66 (-5.99, 0.66)         | -1.37 (-4.39, 1.65)         | 0.49 (-2.82, 3.79)       | -0.80 (-3.91, 2.30)         | <b>QLTY</b>         |                          |                             |                             |           |  |
| -1.15 (-3.12, 0.81)         | -0.27 (-2.33, 1.78)         | -0.68 (-2.89, 1.53)         | -2.65 (-5.29, 0.01)         | -1.36 (-3.63, 0.91)         | 0.51 (-2.12, 3.12)       | -0.79 (-3.17, 1.59)         | 0.02 (-3.29, 3.32)  | <b>QLP</b>               |                             |                             |           |  |
| 0.08 (-2.05, 2.19)          | 0.96 (-1.24, 3.16)          | 0.55 (-1.79, 2.90)          | -1.42 (-4.18, 1.35)         | -0.13 (-2.55, 2.28)         | 1.74 (-1.01, 4.49)       | 0.44 (-2.07, 2.96)          | 1.24 (-2.15, 4.63)  | 1.23 (-1.52, 3.97)       | <b>QLAS</b>                 |                             |           |  |
| 2.48 (-0.20, 5.17)          | <b>3.37 (0.64, 6.13)</b>    | <b>2.95 (0.10, 5.82)</b>    | 0.98 (-2.21, 4.21)          | 2.28 (-0.63, 5.21)          | <b>4.14 (0.94, 7.35)</b> | 2.85 (-0.13, 5.85)          | 3.65 (-0.11, 7.43)  | <b>3.64 (0.44, 6.84)</b> | 2.40 (-0.88, 5.71)          | <b>SSTL</b>                 |           |  |
| <b>-2.92 (-3.57, -2.27)</b> | <b>-2.03 (-2.90, -1.16)</b> | <b>-2.44 (-3.63, -1.26)</b> | <b>-4.42 (-6.30, -2.49)</b> | <b>-3.12 (-4.45, -1.79)</b> | -1.25 (-3.12, 0.62)      | <b>-2.55 (-4.04, -1.05)</b> | -1.75 (-4.47, 0.98) | -1.76 (-3.63, 0.10)      | <b>-2.99 (-5.01, -0.97)</b> | <b>-5.40 (-8.01, -2.82)</b> | <b>ST</b> |  |

Table S12: Urination disorder score

The league table summarizes pairwise comparisons, with effect estimates presented as MDs and 95% CIs. For example, the MD for **QLST versus NMT** in **urination disorder score** is  $-0.63$  (95% CI:  $-1.30$  to  $0.04$ ). An MD  $> 0$  favors the row drug, whereas an MD  $< 0$  favors the column drug. Red text: 95% CI does not cross zero.

|                      |                      |                      |                     |                      |                      |                      |                      |                     |                     |                     |           |
|----------------------|----------------------|----------------------|---------------------|----------------------|----------------------|----------------------|----------------------|---------------------|---------------------|---------------------|-----------|
| <b>QLST</b>          |                      |                      |                     |                      |                      |                      |                      |                     |                     |                     |           |
| -0.63 (-1.30, 0.04)  | <b>NMT</b>           |                      |                     |                      |                      |                      |                      |                     |                     |                     |           |
| -0.77 (-1.62, 0.07)  | -0.14 (-1.05, 0.76)  | <b>QLAT</b>          |                     |                      |                      |                      |                      |                     |                     |                     |           |
| -1.24 (-2.49, 0.02)  | -0.61 (-1.90, 0.69)  | -0.47 (-1.85, 0.94)  | <b>SJ</b>           |                      |                      |                      |                      |                     |                     |                     |           |
| -0.57 (-1.49, 0.35)  | 0.06 (-0.91, 1.04)   | 0.21 (-0.90, 1.31)   | 0.67 (-0.77, 2.11)  | <b>QLJD</b>          |                      |                      |                      |                     |                     |                     |           |
| 0.44 (-0.77, 1.65)   | 1.07 (-0.18, 2.32)   | 1.22 (-0.14, 2.56)   | 1.68 (0.04, 3.32)   | 1.01 (-0.39, 2.41)   | <b>QLBX</b>          |                      |                      |                     |                     |                     |           |
| 0.51 (-0.52, 1.53)   | 1.14 (0.06, 2.21)    | 1.28 (0.09, 2.47)    | 1.74 (0.24, 3.25)   | 1.07 (-0.17, 2.31)   | 0.06 (-1.41, 1.53)   | <b>RLQ</b>           |                      |                     |                     |                     |           |
| -0.04 (-1.83, 1.77)  | 0.59 (-1.24, 2.42)   | 0.73 (-1.16, 2.64)   | 1.20 (-0.91, 3.32)  | 0.52 (-1.41, 2.46)   | -0.49 (-2.57, 1.60)  | -0.55 (-2.53, 1.44)  | <b>QLTY</b>          |                     |                     |                     |           |
| -0.69 (-1.95, 0.56)  | -0.06 (-1.36, 1.23)  | 0.09 (-1.31, 1.48)   | 0.55 (-1.12, 2.22)  | -0.12 (-1.56, 1.32)  | -1.13 (-2.78, 0.51)  | -1.20 (-2.70, 0.31)  | -0.64 (-2.77, 1.46)  | <b>QLP</b>          |                     |                     |           |
| -1.41 (-2.65, -0.14) | -0.78 (-2.07, 0.54)  | -0.63 (-2.02, 0.78)  | -0.17 (-1.83, 1.52) | -0.84 (-2.27, 0.62)  | -1.85 (-3.48, -0.19) | -1.91 (-3.42, -0.39) | -1.36 (-3.48, 0.77)  | -0.72 (-2.40, 0.98) | <b>QLAS</b>         |                     |           |
| -1.64 (-3.25, -0.03) | -1.01 (-2.66, 0.64)  | -0.87 (-2.58, 0.86)  | -0.40 (-2.35, 1.55) | -1.07 (-2.84, 0.69)  | -2.08 (-4.01, -0.15) | -2.15 (-3.96, -0.33) | -1.60 (-3.94, 0.74)  | -0.95 (-2.91, 1.00) | -0.23 (-2.21, 1.73) | <b>SSTL</b>         |           |
| -1.84 (-2.25, -1.42) | -1.21 (-1.74, -0.68) | -1.06 (-1.80, -0.33) | -0.60 (-1.78, 0.58) | -1.27 (-2.09, -0.45) | -2.28 (-3.41, -1.14) | -2.34 (-3.28, -1.41) | -1.79 (-3.56, -0.06) | -1.15 (-2.33, 0.04) | -0.43 (-1.63, 0.75) | -0.20 (-1.76, 1.36) | <b>ST</b> |

Table S13: Quality of life score

The league table summarizes pairwise comparisons, with effect estimates expressed as MDs and 95% CIs. For example, the MD for **QLST versus NMT** in **quality of life score** is **-0.23** (95% CI: **-0.94 to 0.46**). An MD > 0 favors the row drug, whereas an MD < 0 favors the column drug. Red text: 95% CI does not cross zero.

|                      |                      |                      |                      |                      |                      |                      |                      |                      |                     |                      |           |
|----------------------|----------------------|----------------------|----------------------|----------------------|----------------------|----------------------|----------------------|----------------------|---------------------|----------------------|-----------|
| <b>QLST</b>          |                      |                      |                      |                      |                      |                      |                      |                      |                     |                      |           |
| -0.23 (-0.94, 0.46)  | <b>NMT</b>           |                      |                      |                      |                      |                      |                      |                      |                     |                      |           |
| 0.11 (-0.76, 0.95)   | 0.34 (-0.63, 1.29)   | <b>QLAT</b>          |                      |                      |                      |                      |                      |                      |                     |                      |           |
| -0.49 (-1.63, 0.66)  | -0.26 (-1.47, 0.98)  | -0.59 (-1.89, 0.74)  | <b>SJ</b>            |                      |                      |                      |                      |                      |                     |                      |           |
| 0.31 (-0.57, 1.16)   | 0.54 (-0.44, 1.51)   | 0.20 (-0.88, 1.28)   | 0.79 (-0.55, 2.11)   | <b>QLJD</b>          |                      |                      |                      |                      |                     |                      |           |
| -0.25 (-1.33, 0.82)  | -0.02 (-1.18, 1.14)  | -0.36 (-1.60, 0.91)  | 0.24 (-1.24, 1.71)   | -0.56 (-1.81, 0.71)  | <b>QLBX</b>          |                      |                      |                      |                     |                      |           |
| 0.51 (-0.42, 1.44)   | 0.74 (-0.28, 1.78)   | 0.41 (-0.72, 1.55)   | 1.00 (-0.37, 2.36)   | 0.21 (-0.93, 1.35)   | 0.76 (-0.55, 2.07)   | <b>RLQ</b>           |                      |                      |                     |                      |           |
| 0.10 (-1.90, 2.10)   | 0.33 (-1.70, 2.38)   | -0.00 (-2.09, 2.11)  | 0.59 (-1.64, 2.83)   | -0.20 (-2.31, 1.91)  | 0.35 (-1.85, 2.56)   | -0.41 (-2.54, 1.73)  | <b>QLTY</b>          |                      |                     |                      |           |
| -0.36 (-1.54, 0.79)  | -0.13 (-1.38, 1.11)  | -0.47 (-1.81, 0.86)  | 0.13 (-1.43, 1.65)   | -0.67 (-2.02, 0.68)  | -0.11 (-1.61, 1.37)  | -0.88 (-2.27, 0.50)  | -0.47 (-2.72, 1.77)  | <b>QLP</b>           |                     |                      |           |
| -1.28 (-2.41, -0.11) | -1.05 (-2.26, 0.21)  | -1.38 (-2.68, -0.03) | -0.79 (-2.30, 0.74)  | -1.58 (-2.89, -0.22) | -1.03 (-2.49, 0.47)  | -1.79 (-3.14, -0.39) | -1.38 (-3.61, 0.88)  | -0.91 (-2.44, 0.65)  | <b>QLAS</b>         |                      |           |
| 2.41 (0.94, 3.86)    | 2.64 (1.12, 4.17)    | 2.30 (0.71, 3.91)    | 2.89 (1.12, 4.66)    | 2.10 (0.51, 3.72)    | 2.66 (0.93, 4.39)    | 1.90 (0.25, 3.54)    | 2.31 (-0.11, 4.72)   | 2.77 (0.99, 4.57)    | 3.69 (1.88, 5.44)   | <b>SSTL</b>          |           |
| -1.89 (-2.28, -1.51) | -1.66 (-2.24, -1.07) | -2.00 (-2.75, -1.23) | -1.41 (-2.49, -0.33) | -2.20 (-2.97, -1.42) | -1.64 (-2.65, -0.64) | -2.41 (-3.25, -1.56) | -2.00 (-3.96, -0.04) | -1.53 (-2.62, -0.42) | -0.61 (-1.72, 0.45) | -4.30 (-5.71, -2.90) | <b>ST</b> |

Table S14: NIH-CPSI score

The league table summarizes pairwise comparisons, with effect estimates expressed as MDs and 95% CIs. For example, the MD for **QLST versus NMT** in **NIH-CPSI score** is **-1.31** (95% CI: **-3.10 to 0.48**). An MD > 0 favors the row drug, whereas an MD < 0 favors the column drug. Red text: 95% CI does not cross zero.

|                      |                      |                      |                      |                      |                      |                      |                      |                      |                     |                     |                       |           |  |
|----------------------|----------------------|----------------------|----------------------|----------------------|----------------------|----------------------|----------------------|----------------------|---------------------|---------------------|-----------------------|-----------|--|
| <b>QLST</b>          |                      |                      |                      |                      |                      |                      |                      |                      |                     |                     |                       |           |  |
| -1.31 (-3.10, 0.48)  | <b>NMT</b>           |                      |                      |                      |                      |                      |                      |                      |                     |                     |                       |           |  |
| -1.68 (-4.06, 0.69)  | -0.37 (-2.92, 2.18)  | <b>QLAT</b>          |                      |                      |                      |                      |                      |                      |                     |                     |                       |           |  |
| 0.12 (-2.87, 3.12)   | 1.44 (-1.69, 4.56)   | 1.81 (-1.69, 5.32)   | <b>SJ</b>            |                      |                      |                      |                      |                      |                     |                     |                       |           |  |
| -1.94 (-4.52, 0.67)  | -0.62 (-3.36, 2.13)  | -0.25 (-3.40, 2.92)  | -2.06 (-5.70, 1.59)  | <b>QLJD</b>          |                      |                      |                      |                      |                     |                     |                       |           |  |
| 0.33 (-2.21, 2.85)   | 1.64 (-1.05, 4.31)   | 2.01 (-1.10, 5.11)   | 0.20 (-3.40, 3.79)   | 2.25 (-1.04, 5.52)   | <b>QLBX</b>          |                      |                      |                      |                     |                     |                       |           |  |
| -1.16 (-4.04, 1.70)  | 0.15 (-2.83, 3.13)   | 0.53 (-2.86, 3.88)   | -1.29 (-5.13, 2.55)  | 0.77 (-2.77, 4.30)   | -1.49 (-4.99, 2.01)  | <b>RLQ</b>           |                      |                      |                     |                     |                       |           |  |
| -1.13 (-5.85, 3.60)  | 0.19 (-4.59, 4.99)   | 0.56 (-4.49, 5.61)   | -1.25 (-6.61, 4.10)  | 0.81 (-4.38, 5.98)   | -1.45 (-6.54, 3.69)  | 0.03 (-5.25, 5.33)   | <b>QLTY</b>          |                      |                     |                     |                       |           |  |
| -1.11 (-4.07, 1.92)  | 0.21 (-2.89, 3.35)   | 0.58 (-2.90, 4.09)   | -1.23 (-5.14, 2.71)  | 0.83 (-2.78, 4.48)   | -1.43 (-5.02, 2.20)  | 0.06 (-3.74, 3.91)   | 0.02 (-5.31, 5.39)   | <b>QLP</b>           |                     |                     |                       |           |  |
| -3.63 (-7.26, 0.05)  | -2.31 (-6.05, 1.47)  | -1.94 (-6.00, 2.16)  | -3.75 (-8.20, 0.74)  | -1.69 (-5.87, 2.51)  | -3.95 (-8.10, 0.25)  | -2.47 (-6.80, 1.92)  | -2.50 (-8.28, 3.29)  | -2.52 (-6.98, 1.95)  | <b>QLAS</b>         |                     |                       |           |  |
| -3.12 (-6.53, 0.27)  | -1.81 (-5.33, 1.69)  | -1.43 (-5.30, 2.40)  | -3.25 (-7.52, 0.99)  | -1.19 (-5.19, 2.77)  | -3.45 (-7.39, 0.49)  | -1.97 (-6.11, 2.19)  | -2.00 (-7.60, 3.59)  | -2.02 (-6.29, 2.21)  | 0.50 (-4.25, 5.21)  | <b>WLT</b>          |                       |           |  |
| 2.13 (-1.34, 5.55)   | 3.43 (-0.13, 6.98)   | 3.81 (-0.11, 7.70)   | 2.00 (-2.34, 6.26)   | 4.06 (0.01, 8.05)    | 1.80 (-2.20, 5.77)   | 3.28 (-0.93, 7.47)   | 3.24 (-2.41, 8.87)   | 3.23 (-1.11, 7.48)   | 5.75 (0.95, 10.50)  | 5.24 (0.66, 9.81)   | <b>SSTL</b>           |           |  |
| -5.91 (-7.02, -4.82) | -4.60 (-6.01, -3.20) | -4.23 (-6.34, -2.12) | -6.04 (-8.83, -3.27) | -3.98 (-6.35, -1.64) | -6.24 (-8.53, -3.94) | -4.76 (-7.39, -2.11) | -4.79 (-9.38, -0.21) | -4.81 (-7.62, -2.05) | -2.29 (-5.80, 1.18) | -2.79 (-6.01, 0.44) | -8.04 (-11.29, -4.75) | <b>ST</b> |  |

Table S15: EPS white blood cell count

The league table summarizes pairwise comparisons, with effect estimates expressed as MDs and 95% CIs. For example, the MD for **QLST versus NMT in EPS white blood cell count** is 0.09 (95% CI: -3.93 to 4.10). An MD > 0 favors the row drug, whereas an MD < 0 favors the column drug. Red text: 95% CI does not cross zero.

|                             |                             |                     |                              |                              |                              |                      |                     |                      |           |
|-----------------------------|-----------------------------|---------------------|------------------------------|------------------------------|------------------------------|----------------------|---------------------|----------------------|-----------|
| <b>QLST</b>                 |                             |                     |                              |                              |                              |                      |                     |                      |           |
| 0.09 (-3.93, 4.10)          | <b>NMT</b>                  |                     |                              |                              |                              |                      |                     |                      |           |
| -2.16 (-6.63, 2.31)         | -2.24 (-7.54, 3.00)         | <b>QLAT</b>         |                              |                              |                              |                      |                     |                      |           |
| 2.74 (-4.01, 9.59)          | 2.65 (-4.58, 10.04)         | 4.90 (-2.63, 12.53) | <b>SJ</b>                    |                              |                              |                      |                     |                      |           |
| 3.33 (-1.56, 8.39)          | 3.24 (-2.37, 9.06)          | 5.48 (-0.43, 11.61) | 0.59 (-7.26, 8.51)           | <b>QLJD</b>                  |                              |                      |                     |                      |           |
| 0.76 (-3.68, 5.21)          | 0.67 (-4.56, 5.89)          | 2.92 (-2.63, 8.51)  | -1.99 (-9.60, 5.53)          | -2.57 (-8.66, 3.35)          | <b>QLBX</b>                  |                      |                     |                      |           |
| -0.21 (-7.28, 6.88)         | -0.30 (-7.91, 7.31)         | 1.95 (-5.95, 9.82)  | -2.96 (-12.38, 6.30)         | -3.53 (-11.81, 4.49)         | -0.98 (-8.81, 6.88)          | <b>RLQ</b>           |                     |                      |           |
| -2.69 (-9.79, 4.39)         | -2.78 (-10.37, 4.85)        | -0.54 (-8.41, 7.37) | -5.43 (-14.94, 3.92)         | -6.02 (-14.27, 2.06)         | -3.46 (-11.28, 4.44)         | -2.49 (-12.06, 7.14) | <b>QLP</b>          |                      |           |
| -2.49 (-9.77, 4.78)         | -2.58 (-10.37, 5.22)        | -0.34 (-8.36, 7.66) | -5.23 (-14.81, 4.20)         | -5.81 (-14.23, 2.39)         | -3.25 (-11.26, 4.77)         | -2.27 (-12.06, 7.49) | 0.20 (-9.54, 9.94)  | <b>SSTL</b>          |           |
| <b>-5.59 (-7.65, -3.52)</b> | <b>-5.67 (-9.12, -2.22)</b> | -3.42 (-7.39, 0.55) | <b>-8.33 (-14.88, -1.92)</b> | <b>-8.91 (-13.54, -4.46)</b> | <b>-6.34 (-10.27, -2.40)</b> | -5.37 (-12.14, 1.40) | -2.89 (-9.68, 3.89) | -3.09 (-10.09, 3.89) | <b>ST</b> |

Table S16: Adverse events

The league table summarizes pairwise comparisons, with effect estimates expressed as ORs and 95% CIs. For example, the OR for **QLST versus NMT in adverse events** is 1.27 (95% CI: 0.52–3.09). An OR > 1 favors the row drug, whereas an OR < 1 favors the column drug. Red text: 95% CI does not cross zero.

|                   |                   |                  |                   |                  |                  |                  |                  |    |
|-------------------|-------------------|------------------|-------------------|------------------|------------------|------------------|------------------|----|
| QLST              |                   |                  |                   |                  |                  |                  |                  |    |
| 1.27 (0.52,3.09)  | NMT               |                  |                   |                  |                  |                  |                  |    |
| 1.60 (0.13,19.88) | 1.26 (0.10,15.38) | QLAT             |                   |                  |                  |                  |                  |    |
| 0.56 (0.08,4.03)  | 0.44 (0.06,3.10)  | 0.35 (0.02,7.43) | SJ                |                  |                  |                  |                  |    |
| 0.92 (0.26,3.29)  | 0.72 (0.21,2.49)  | 0.57 (0.04,8.19) | 1.64 (0.19,14.10) | QLJD             |                  |                  |                  |    |
| 0.79 (0.13,4.73)  | 0.62 (0.11,3.63)  | 0.49 (0.03,9.33) | 1.41 (0.12,17.02) | 0.86 (0.12,6.26) | QLBX             |                  |                  |    |
| 0.52 (0.18,1.49)  | 0.41 (0.15,1.11)  | 0.33 (0.03,4.21) | 0.93 (0.12,7.06)  | 0.57 (0.15,2.20) | 0.66 (0.10,4.21) | RLQ              |                  |    |
| 0.71 (0.23,2.17)  | 0.56 (0.19,1.64)  | 0.44 (0.03,5.89) | 1.27 (0.16,9.97)  | 0.77 (0.19,3.17) | 0.90 (0.14,5.97) | 1.36 (0.41,4.54) | WLT              |    |
| 0.79 (0.40,1.54)  | 0.62 (0.34,1.12)  | 0.49 (0.04,5.57) | 1.41 (0.22,9.01)  | 0.86 (0.29,2.54) | 1.00 (0.19,5.28) | 1.51 (0.67,3.37) | 1.11 (0.45,2.73) | ST |

### Appendix 13: Sensitivity analyses of total effective rate.

The term "before" refers to the combined OR from all CPMs directly compared to ST, which are 3.83[3.36, 4.35]. We employed a leave-one-out analysis to investigate whether the exclusion of each study significantly affected the original effect size. For example, in the comparison with ST, after excluding “Wang 2023”, the remaining effect size is 3.83 [3.36, 4.36].

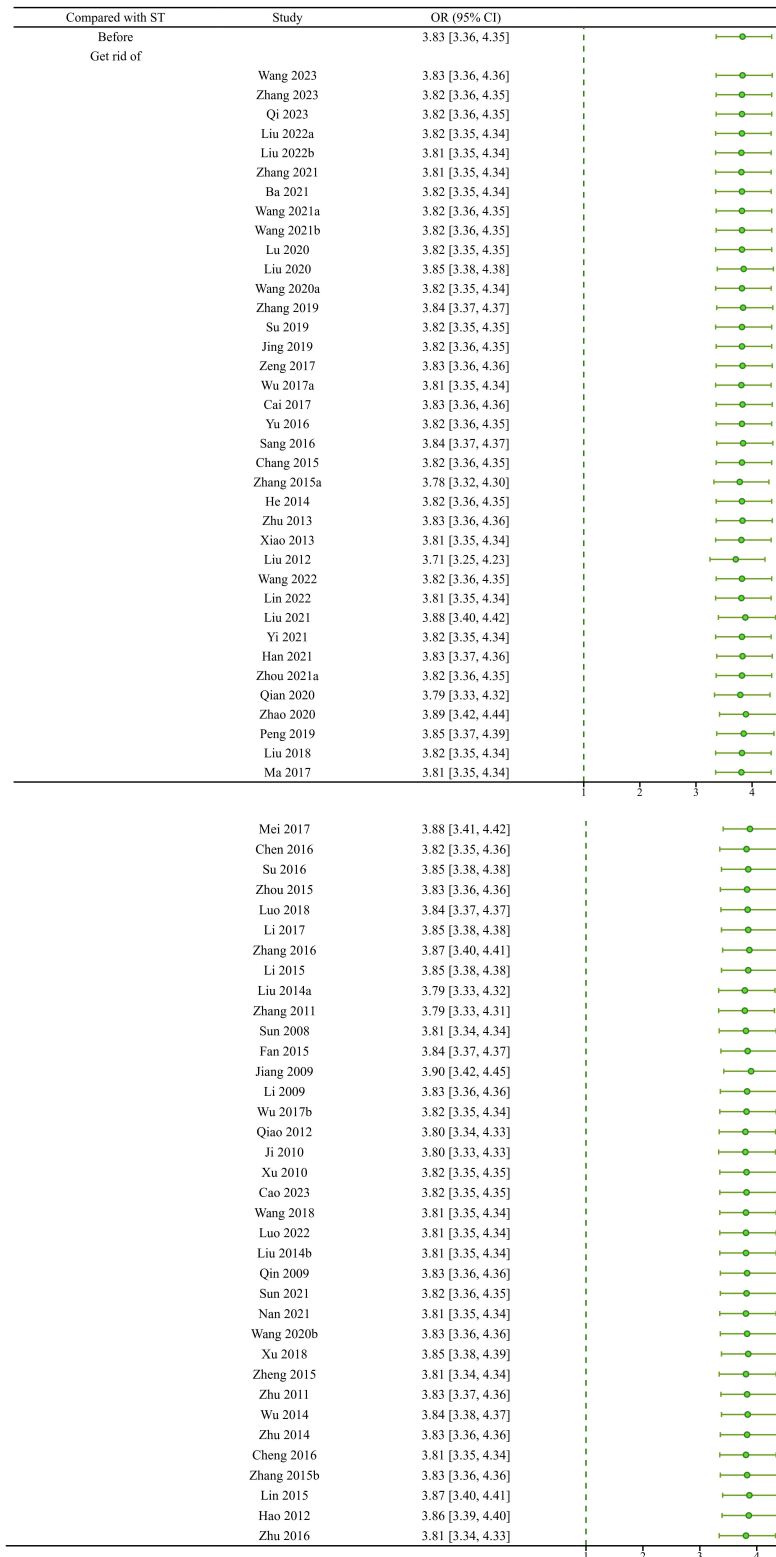

Appendix 14: The meta-regression of the factors that may lead to differences to the main outcome indicators

| Factors   | Total effective rate |         |        |         |               |
|-----------|----------------------|---------|--------|---------|---------------|
|           | Coefficient          | std err | t      | P value | 95%CI         |
| Duration  | 0.0209               | 0.247   | 0.072  | 0.982   | -0.828, 0.848 |
| Follow-up | -0.5318              | 0.252   | -1.853 | 0.116   | -2.016, 0.236 |
| Age       | -0.0106              | 0.182   | -0.046 | 0.919   | -0.391, 0.279 |

## Appendix 15: Excluded Full-Text Studies and Rationale

| Study      | Title                                                                                                                                                                  | Exclusion Reason          |
|------------|------------------------------------------------------------------------------------------------------------------------------------------------------------------------|---------------------------|
| Chen 2024  | Effect of Extracorporeal Shock Wave Combined with Qianlieshutong Capsule in the Treatment of Chronic Prostatitis in Elderly Patients                                   | Population not eligible   |
| Pan 2024   | Clinical Effect of Qianlieshutong Capsule Combined with Tamsulosin Hydrochloride Sustained-Release Capsule in the Treatment of Prostatitis                             | Intervention not eligible |
| Zhang 2023 | Effect of Qianlieshutong Capsule Combined with Extracorporeal Shock Wave in Patients with Chronic Prostatitis                                                          | Intervention not eligible |
| Zhang 2022 | Comprehensive Clinical Evaluation of Qianlieshutong Capsule for Chronic Prostatitis of Damp-Heat and Blood-Stasis Syndrome                                             | Outcome not eligible      |
| Feng 2021  | Efficacy of Quinolone Antibiotics Combined with Qianlieshutong Capsule on Chronic Bacterial Prostatitis and Their Effects on Immune-Inflammatory Markers               | Outcome not eligible      |
| Hou 2021   | Clinical Observation of Qianlieshutong Capsule Combined with Jiedu Huoxue Tablet in the Treatment of Type III Prostatitis                                              | Intervention not eligible |
| Li 2020    | Observation of the Efficacy of Quinolone Antibiotics Combined with Qianlieshutong Capsule in Treating Chronic Bacterial Prostatitis                                    | Outcome not eligible      |
| Yi 2020    | Clinical Evaluation of Qianlieshutong Capsule in Treating Damp-Heat and Blood-Stasis Type Prostatitis                                                                  | Outcome not eligible      |
| Meng 2020  | Study on the Effect of Qianlieshutong Capsule Combined with Levofloxacin Tablets in the Treatment of Chronic Bacterial Prostatitis                                     | Intervention not eligible |
| Qu 2020    | Clinical Efficacy of Qianlieshutong Capsule Combined with Qianlikang Enema Decoction in Treating Type III Chronic Prostatitis with Damp-Heat and Blood-Stasis Syndrome | Outcome not eligible      |
| Li 2020    | Effect of Qianlieshutong Capsule Combined with Terazosin on Cytokines in Prostatic Fluid of Patients with Type III Chronic Prostatitis                                 | Intervention not eligible |
| Wei 2020   | Clinical Observation of Qianlieshutong Capsule Combined with Moxifloxacin Hydrochloride in the Treatment of Chronic Prostatitis                                        | Outcome not eligible      |
| Gong 2019  | Observation on the Effect of Qianlieshutong Capsule in Treating Prostatitis                                                                                            | Outcome not eligible      |
| Zhang 2019 | Clinical Efficacy of Qianlieshutong Capsule in Treating Chronic Prostatitis                                                                                            | Intervention not eligible |
| Liu 2019   | Observation on the Efficacy of Tamsulosin Combined with Qianlieshutong Capsule in the Treatment of Type III Prostatitis                                                | Outcome not eligible      |
| Liu 2019   | Observation on the Efficacy of Qianlieshutong Capsule Combined with Tamsulosin Hydrochloride in the Treatment of Type IIIB Prostatitis                                 | Outcome not eligible      |

|               |                                                                                                                                             |                           |
|---------------|---------------------------------------------------------------------------------------------------------------------------------------------|---------------------------|
| Zhang<br>2019 | Clinical Efficacy of Qianlieshutong Capsule Combined with Microwave Therapy for Chronic Prostatitis                                         | Population not eligible   |
| Deng<br>2019  | Observation on the Efficacy of Qianlieshutong Capsule Combined with Finasteride in the Treatment of Chronic Prostatitis                     | Outcome not eligible      |
| Chen<br>2018  | Analysis of 120 Cases of Type IIIB Prostatitis Treated with Qianlieshutong Capsule Combined with Tamsulosin Sustained-Release Capsule       | Outcome not eligible      |
| Yin<br>2018   | Clinical Efficacy of Qianlieshutong Capsule Combined with Finasteride in the Treatment of Benign Prostatic Hyperplasia                      | Outcome not eligible      |
| Zhu<br>2018   | Observation on the Efficacy of Quinolone Antibiotics Combined with Qianlieshutong Capsule in the Treatment of Chronic Bacterial Prostatitis | Outcome not eligible      |
| Li<br>2017    | Observation on the Efficacy of Qianlieshutong Capsule Combined with Tamsulosin in the Treatment of Type IIIB Prostatitis                    | Full text unavailable     |
| Zhang<br>2017 | Clinical Observation on the Efficacy of Qianlieshutong Capsule in the Treatment of Prostatitis                                              | Outcome not eligible      |
| Liu<br>2017   | Clinical Study of Qianlieshutong Capsule Combined with Quinolone Antibiotics in the Treatment of Chronic Bacterial Prostatitis              | Intervention not eligible |
| Wang<br>2016  | Observation on the Efficacy of Fosfomycin Tromethamine Combined with Qianlieshutong Capsule in Treating Chronic Prostatitis                 | Intervention not eligible |
| Zhang<br>2015 | Efficacy of Qianlieshutong Capsule Combined with Quinolone Antibiotics in the Treatment of Chronic Bacterial Prostatitis                    | Population not eligible   |
| Yue<br>2015   | Clinical Observation on the Efficacy of Qianlieshutong Capsule in the Treatment of Chronic Prostatitis: A Report of 258 Cases               | Outcome not eligible      |
| Xuan<br>2015  | Qianlieshutong Capsule in the Treatment of Damp-Heat and Blood-Stasis Type Prostatitis                                                      | Intervention not eligible |
| Zhang<br>2015 | Observation and Nursing of 80 Cases of Type III Prostatitis Treated with Qianlieshutong Capsule Combined with Levofloxacin                  | Outcome not eligible      |
| Qi<br>2015    | Study on the Efficacy of Qianlieshutong Capsule Combined with Antibiotics in the Treatment of Chronic Bacterial Prostatitis                 | Outcome not eligible      |
| Ai<br>2012    | Clinical Observation on the Efficacy of Qianlieshutong Capsule in the Treatment of Chronic Prostatitis                                      | Outcome not eligible      |
| Xuan<br>2012  | Observation on the Efficacy of Qianlieshutong Capsule Combined with Tamsulosin in the Treatment of Benign Prostatic Hyperplasia             | Outcome not eligible      |
| Fan<br>2012   | Analysis of 126 Cases of Chronic Prostatitis Treated with Qianlieshutong Capsule Combined with Levofloxacin                                 | Intervention not eligible |

|               |                                                                                                                                                               |                           |
|---------------|---------------------------------------------------------------------------------------------------------------------------------------------------------------|---------------------------|
| Liu<br>2012   | Clinical Study of Levofloxacin Combined with Qianlieshutong Capsule in the Treatment of Chronic Prostatitis                                                   | Intervention not eligible |
| Lv<br>2012    | Study of 200 Cases of Chronic Bacterial Prostatitis Treated with Qianlieshutong Capsule Combined with Gatifloxacin                                            | Intervention not eligible |
| Li<br>2011    | Study of 60 Cases of Type III Prostatitis Treated with Qianlieshutong Capsule Combined with Quinolone Drugs                                                   | Outcome not eligible      |
| Dou<br>2011   | Evaluation of Efficacy and Safety of Muscarinic Receptor Antagonist Combined with Qianlieshutong Capsule in the Treatment of Prostatitis                      | Intervention not eligible |
| Chen<br>2011  | Clinical Observation on the Treatment of Chronic Prostatitis with Qianlieshutong Capsule                                                                      | Outcome not eligible      |
| Liu<br>2010   | Comparative Study on the Efficacy of Qianlieshutong Capsule Combined with Norfloxacin in the Treatment of Damp-Heat and Blood-Stasis Type Chronic Prostatitis | Intervention not eligible |
| Xun<br>2010   | Clinical Efficacy of Qianlieshutong Capsule in the Treatment of Chronic Prostatitis                                                                           | Outcome not eligible      |
| Xie<br>2010   | Experience of 240 Cases of Chronic Bacterial Prostatitis Treated with Qianlieshutong Capsule Combined with Sparfloxacin                                       | Intervention not eligible |
| Gu<br>2009    | Qianlieshutong Capsule in the Treatment of 80 Cases of Chronic Prostatitis                                                                                    | Outcome not eligible      |
| Zhao<br>2009  | Clinical Observation of Qianlieshutong Capsule in the Treatment of Damp-Heat and Blood-Stasis Type Chronic Prostatitis                                        | Outcome not eligible      |
| Gong<br>2009  | Self-Controlled Study on Qianlieshutong Capsule in the Treatment of Type III Prostatitis                                                                      | Intervention not eligible |
| Yuan<br>2009  | Qianlieshutong Capsule in the Treatment of 83 Cases of Qi-Stagnation and Blood-Stasis Type Chronic Prostatitis                                                | Study design not eligible |
| Jiang<br>2009 | Qianlieshutong Capsule Combined with Compound Sulfamethoxazole Tablets in the Treatment of Type III Prostatitis                                               | Intervention not eligible |
| Feng<br>2009  | Clinical Study on the Efficacy of Qianlieshutong Capsule in the Treatment of Chronic Non-Bacterial Prostatitis                                                | Outcome not eligible      |
| Zhang<br>2009 | Study of 95 Cases of Chronic Bacterial Prostatitis Treated with Qianlieshutong Capsule Combined with Levofloxacin                                             | Outcome not eligible      |
| Chen<br>2009  | Clinical Study of Qianlieshutong Capsule Combined with Compound Sulfamethoxazole Tablets in 100 Cases of Chronic Bacterial Prostatitis                        | Outcome not eligible      |
| Zhong<br>2008 | Qianlieshutong Capsule in the Treatment of 84 Cases of Chronic Prostatitis                                                                                    | Outcome not eligible      |

|               |                                                                                                                                                                                  |                           |
|---------------|----------------------------------------------------------------------------------------------------------------------------------------------------------------------------------|---------------------------|
| Zhu<br>2008   | Qianlieshutong Capsule in the Treatment of 30 Cases of Damp-Heat and Blood-Stasis Type Chronic Prostatitis                                                                       | Intervention not eligible |
| Zhang<br>2008 | Qianlieshutong Capsule in the Treatment of 41 Cases of Chronic Non-Bacterial Prostatitis                                                                                         | Outcome not eligible      |
| Wang<br>2008  | Observation on the Efficacy of Qianlieshutong Capsule Combined with Levofloxacin in the Treatment of Chronic Prostatitis                                                         | Intervention not eligible |
| Xiong<br>2008 | Study of 46 Cases of Chronic Bacterial Prostatitis Treated with Qianlieshutong Capsule Combined with Levofloxacin                                                                | Intervention not eligible |
| Ma<br>2006    | Clinical Study of Qianlieshutong Capsule Combined with Quinolone Antibiotics in 100 Cases of Chronic Bacterial Prostatitis                                                       | Outcome not eligible      |
| Sun<br>2024   | Effect of Ningmitai Capsule Combined with Levofloxacin on Inflammatory Factors and Immune Function in Patients with Chronic Prostatitis                                          | Outcome not eligible      |
| Lu<br>2023    | Study on the Effect of Ningmitai Capsule in Improving Pain Caused by Chronic Prostatitis                                                                                         | Outcome not eligible      |
| Dong<br>2022  | Clinical Observation of Ningmitai Capsule in Patients with Different Phenotypes of Chronic Prostatitis/Chronic Pelvic Pain Syndrome Based on the UPOINT(S) Classification System | Outcome not eligible      |
| Wang<br>2021  | Effect of Ningmitai Capsule Combined with Tamsulosin Hydrochloride Sustained-Release Capsule on Chronic Prostatitis and Inflammatory Factors                                     | Outcome not eligible      |
| Xu<br>2021    | Clinical Study of Ningmitai Capsule Combined with Naftopidil in the Treatment of Chronic Non-Bacterial Prostatitis                                                               | Population not eligible   |
| Wang<br>2020  | Clinical Study of Ningmitai Capsule Combined with Tamsulosin Hydrochloride Sustained-Release Tablets in the Treatment of Noninfectious Type III Prostatitis                      | Intervention not eligible |
| Gai<br>2020   | Clinical Analysis of Tamsulosin Hydrochloride Capsule Combined with Ningmitai Capsule in the Treatment of Type III Prostatitis                                                   | Intervention not eligible |
| Li<br>2020    | Efficacy of Ningmitai Capsule Combined with Levofloxacin in the Treatment of Chronic Prostatitis                                                                                 | Intervention not eligible |
| Gao<br>2020   | Effect of Ningmitai Capsule Combined with Levofloxacin Tablets in the Treatment of Patients with Chronic Prostatitis                                                             | Intervention not eligible |
| Lin<br>2019   | Observation on the Efficacy of Ningmitai Capsule in the Treatment of Chronic Prostatitis                                                                                         | Outcome not eligible      |
| Peng<br>2019  | Observation on the Efficacy of Ningmitai Capsule Combined with Levofloxacin in the Treatment of Chronic Prostatitis                                                              | Intervention not eligible |
| Hu<br>2019    | Observation on the Efficacy of Ningmitai Capsule Combined with Double-Dose Tamsulosin Hydrochloride Sustained-Release Tablets in the Treatment of Type IIIB Prostatitis          | Intervention not eligible |
| Cai<br>2019   | Observation on the Efficacy of Ningmitai Capsule Combined with Levofloxacin Tablets in the Treatment of Chronic Prostatitis                                                      | Outcome not eligible      |

|               |                                                                                                                                        |                           |
|---------------|----------------------------------------------------------------------------------------------------------------------------------------|---------------------------|
| Hu<br>2018    | Ningmitai Capsule Combined with Tamsulosin Hydrochloride Sustained-Release Agent in the Treatment of Chronic Non-Bacterial Prostatitis | Outcome not eligible      |
| Wang<br>2018  | Study on the Clinical Efficacy of Ningmitai Capsule Combined with Levofloxacin Capsules in the Treatment of Chronic Prostatitis        | Outcome not eligible      |
| Lin<br>2016   | Clinical Study of Ningmitai Capsule in the Treatment of Type III Prostatitis                                                           | Outcome not eligible      |
| Liu<br>2016   | Observation on the Effect of Ningmitai Capsule Combined with Antibiotics in the Treatment of Chronic Prostatitis                       | Outcome not eligible      |
| Xiang<br>2013 | Observation on the Efficacy of Ningmitai Capsule Combined with Levofloxacin Tablets in the Treatment of Chronic Prostatitis            | Outcome not eligible      |
| Che<br>2013   | Clinical Observation of Ningmitai Capsule Combined with Levofloxacin in the Treatment of Chronic Prostatitis                           | Outcome not eligible      |
| Xiang<br>2013 | Observation on the Efficacy of Ningmitai Capsule Combined with Levofloxacin Tablets in the Treatment of Chronic Prostatitis            | Intervention not eligible |
| Wu<br>2013    | Study of 48 Cases of Chronic Prostatitis Treated with Azithromycin Dispersible Tablets Combined with Ningmitai Capsule                 | Outcome not eligible      |
| Yu<br>2012    | Clinical Observation on the Treatment of Chronic Prostatitis with Ningmitai Capsule                                                    | Outcome not eligible      |
| Lu<br>2012    | Study of 30 Cases of Chronic Prostatitis Treated with Ningmitai Capsule Combined with Doxycycline Tablets                              | Outcome not eligible      |
| Li<br>2012    | Clinical Analysis of the Efficacy of Ningmitai Capsule in the Treatment of Chronic Aseptic Prostatitis                                 | Outcome not eligible      |
| Huang<br>2011 | Study of 229 Cases of Chronic Prostatitis Treated with Ningmitai Capsule Combined with Roxithromycin Sustained-Release Capsules        | Outcome not eligible      |
| Wang<br>2011  | Study of 59 Cases of Chronic Prostatitis Treated with Ningmitai Capsule                                                                | Intervention not eligible |
| Yu<br>2010    | Clinical Observation on the Efficacy of Ningmitai Capsule Combined with Levofloxacin Capsules in the Treatment of Chronic Prostatitis  | Intervention not eligible |
| Zhang<br>2009 | Observation on the Efficacy of Ningmitai Capsule in the Treatment of Chronic Prostatitis                                               | Intervention not eligible |
| Fan<br>2008   | Clinical Observation of 500 Cases of Chronic Prostatitis Treated with Ningmitai Capsule                                                | Outcome not eligible      |
| Cao<br>2008   | Clinical Observation of Ningmitai Capsule Combined with Alfuzosin in the Treatment of Nonbacterial Prostatitis                         | Outcome not eligible      |
| Liu<br>2007   | Clinical Observation on the Efficacy of Ningmitai Capsule in the Treatment of Chronic Prostatitis                                      | Intervention not eligible |

|               |                                                                                                                                                                     |                           |
|---------------|---------------------------------------------------------------------------------------------------------------------------------------------------------------------|---------------------------|
| Zhang<br>2004 | Ningmitai Capsule Combined with Doxycycline Tablets in the Treatment of Chronic Prostatitis                                                                         | Outcome not eligible      |
| Chen<br>2004  | Experience of 90 Cases of Chronic Pelvic Pain Syndrome Treated with Ningmitai Capsule                                                                               | Intervention not eligible |
| Cai<br>2004   | Study of 86 Cases of Chronic Prostatitis Treated with Ningmitai Capsule                                                                                             | Outcome not eligible      |
| Ren<br>2003   | Study of 320 Cases of Chronic Prostatitis Treated with Ningmitai Capsule                                                                                            | Outcome not eligible      |
| Zhang<br>2002 | Evaluation of the Therapeutic Effect of Ningmitai Capsule in the Treatment of Chronic Prostatitis                                                                   | Outcome not eligible      |
| Yang<br>2019  | Effect of Qianlian Tong Tablets Combined with Azithromycin on Clinical Efficacy, Safety, and Prostatic Function in Patients with Chronic Prostatitis                | Intervention not eligible |
| Guo<br>2013   | Clinical Study of Tamsulosin Hydrochloride Combined with Qianlian Tong Tablets in the Treatment of Chronic Prostatitis                                              | Intervention not eligible |
| Li<br>2011    | Clinical Observation of Qianlian Tong Tablets Combined with Compound Sulfamethoxazole in the Treatment of Chronic Prostatitis                                       | Outcome not eligible      |
| Zhang<br>2010 | Analysis of 120 Cases of Chronic Bacterial Prostatitis Treated with Qianlian Tong Tablets Combined with Gatifloxacin                                                | Outcome not eligible      |
| Liu<br>2010   | Clinical Observation of Tamsulosin Hydrochloride Sustained-Release Tablets Combined with Qianlian Tong Tablets in the Treatment of Chronic Nonbacterial Prostatitis | Population not eligible   |
| Li<br>2009    | Comparative Observation on the Efficacy of Ningmitai Capsule and Qianlian Tong Tablets in the Treatment of Chronic Prostatitis                                      | Population not eligible   |
| Wang<br>2008  | Clinical Observation of Qianlian Tong Tablets in the Treatment of Type III Chronic Prostatitis                                                                      | Population not eligible   |
| Jiang<br>2007 | Clinical Analysis of the Efficacy of Qianlian Tong Tablets in the Treatment of Chronic Prostatitis                                                                  | Intervention not eligible |
| Guo<br>2007   | Clinical Study of Qianlian Tong Tablets in the Treatment of Chronic Pelvic Pain Syndrome                                                                            | Intervention not eligible |
| Zhu<br>2005   | Observation on the Efficacy of Qianlian Tong Tablets in 116 Cases of Aseptic Prostatitis                                                                            | Outcome not eligible      |
| Jin<br>2003   | Analysis of 100 Cases of Chronic Prostatitis Treated with Qianlian Tong Tablets                                                                                     | Outcome not eligible      |
| Zhou<br>2013  | Study of 70 Cases of Chronic Prostatitis Treated with Sanjin Tablets                                                                                                | Population not eligible   |
| Wei<br>2013   | Observation on the Effect of Sanjin Tablets Combined with Tamsulosin and Ciprofloxacin in the Treatment of Chronic Prostatitis                                      | Intervention not eligible |

|               |                                                                                                                                                                               |                           |
|---------------|-------------------------------------------------------------------------------------------------------------------------------------------------------------------------------|---------------------------|
| Shen<br>2012  | Observation on the Efficacy of Sanjin Tablets, Tamsulosin, and Ciprofloxacin in the Treatment of Chronic Prostatitis                                                          | Outcome not eligible      |
| Xu<br>2011    | Observation on the Efficacy of Sanjin Tablets in 34 Cases of Chronic Prostatitis                                                                                              | Outcome not eligible      |
| Zhang<br>2010 | Observation on the Efficacy of Sanjin Tablets Combined with Tamsulosin and Ciprofloxacin in the Treatment of Chronic Prostatitis                                              | Intervention not eligible |
| Zhang<br>2009 | Clinical Observation of Sanjin Tablets Combined with Antibiotics in the Treatment of Chronic Prostatitis                                                                      | Outcome not eligible      |
| Gan<br>2017   | Clinical Study of Qianlie Jiedu Capsule Combined with Tamsulosin Hydrochloride Sustained-Release Tablets in the Treatment of Chronic Prostatitis/Chronic Pelvic Pain Syndrome | Intervention not eligible |
| Liu<br>2016   | Study on the Efficacy and Safety of Qianlie Jiedu Capsule in the Treatment of Chronic Prostatitis                                                                             | Intervention not eligible |
| Yang<br>2010  | Clinical Observation of 180 Cases of Chronic Prostatitis Treated with Qianlie Jiedu Capsule                                                                                   | Outcome not eligible      |
| Wang<br>2008  | Clinical Observation of 235 Cases of Prostatitis Treated with Qianlie Jiedu Capsule                                                                                           | Intervention not eligible |
| Zhou<br>2002  | Clinical Observation on the Treatment of Chronic Prostatitis with Qianlie Jiedu Capsule                                                                                       | Outcome not eligible      |
| Xiao<br>2014  | Clinical Observation of Qianlie Beixi Capsule Combined with Tamsulosin in the Treatment of Chronic Prostatitis                                                                | Outcome not eligible      |
| Li<br>2010    | Clinical Observation of 96 Cases of Chronic Nonbacterial Prostatitis Treated with Tamsulosin Hydrochloride and Qianlie Beixi Capsule                                          | Intervention not eligible |
| Xu<br>2016    | Clinical Efficacy of Relinqing Granules as an Adjuvant in the Treatment of Chronic Prostatitis                                                                                | Intervention not eligible |
| Li<br>2015    | Observation on the Efficacy of Relinqing Granules Combined with Lomefloxacin in the Treatment of Prostatitis                                                                  | Intervention not eligible |
| Zhao<br>2005  | Observation on the Efficacy of Relinqing Granules in Treating Damp-Heat Type Chronic Prostatitis                                                                              | Outcome not eligible      |
| Wang<br>2019  | Observation on the Efficacy of Qianlie Tongyu Capsule in the Treatment of Chronic Nonbacterial Prostatitis                                                                    | Intervention not eligible |
| Lin<br>2015   | Clinical Observation of Qianlie Tongyu Capsule Combined with Tamsulosin Sustained-Release Tablets in the Treatment of Prostatodynia                                           | Intervention not eligible |
| Gong<br>2012  | Clinical Observation of Qianlie Tongyu Capsule in the Treatment of Chronic Prostatitis                                                                                        | Intervention not eligible |
| Chen<br>2009  | Observation on the Efficacy of Qianlie Tongyu Capsule Combined with Terazosin in the Treatment of Type IIIB Prostatitis                                                       | Intervention not eligible |

|               |                                                                                                                                         |                           |
|---------------|-----------------------------------------------------------------------------------------------------------------------------------------|---------------------------|
| Li<br>2007    | Observation on the Efficacy of Qianlie Tongyu Capsule in 80 Cases of Chronic Prostatitis                                                | Study design not eligible |
| Sun<br>2003   | Observation of 186 Cases of Chronic Pelvic Pain Syndrome Treated with Qianlie Tongyu Capsule                                            | Intervention not eligible |
| Ke<br>2016    | Observation on the Efficacy of Qianlieping Capsule in the Treatment of Chronic Aseptic Prostatitis                                      | Intervention not eligible |
| Li<br>2012    | Analysis of 220 Cases of Chronic Prostatitis Treated with Qianlieping Capsule Combined with $\alpha$ -Receptor Blockers                 | Intervention not eligible |
| Lu<br>2009    | Observation of 115 Cases of Chronic Prostatitis Treated with Qianlieping Capsule                                                        | Outcome not eligible      |
| Li<br>2004    | Clinical Study of Qianlieping Capsule in the Treatment of Chronic Prostatitis                                                           | Intervention not eligible |
| Liu<br>2023   | Effect of Qianlian Suppository Combined with Tamsulosin Hydrochloride on Chronic Nonbacterial Prostatitis and Patients' Quality of Life | Intervention not eligible |
| Tan<br>2021   | Clinical Study of Qianlian Suppository in the Treatment of Chronic Prostatitis                                                          | Intervention not eligible |
| Wen<br>2017   | Analysis of the Efficacy of Qianlian Suppository in the Treatment of Chronic Prostatitis                                                | Outcome not eligible      |
| Xu<br>2012    | Clinical Observation of Tamsulosin Hydrochloride Combined with Qianlian Suppository in the Treatment of Type III Prostatitis            | Intervention not eligible |
| He<br>2010    | Clinical Study on Qianlian Suppository for Chronic Prostatitis                                                                          | Outcome not eligible      |
| Lv<br>2009    | Observation of 40 Cases of Chronic Prostatitis Treated with Lomefloxacin Combined with Qianlian Suppository                             | Intervention not eligible |
| Tan<br>2009   | Clinical Analysis of 276 Cases of Chronic Prostatitis Treated with Qianlian Suppository Combined with Clarithromycin                    | Intervention not eligible |
| Zhang<br>2008 | Observation on the Efficacy of Qianlian Suppository Combined with Clarithromycin in the Treatment of Nonbacterial Prostatitis           | Population not eligible   |
| Hao<br>2008   | Clinical Observation on the Efficacy of Terazosin Combined with Qianlian Suppository in the Treatment of Type III Prostatitis           | Outcome not eligible      |
| Xiao<br>2007  | Clinical Observation of 45 Cases of Inflammatory Chronic Pelvic Pain Syndrome Treated with Qianlian Suppository                         | Intervention not eligible |
| Jiang<br>2007 | Clinical Analysis of the Efficacy of Qianlian Suppository in Patients with Chronic Prostatitis                                          | Outcome not eligible      |

|               |                                                                                                       |                           |
|---------------|-------------------------------------------------------------------------------------------------------|---------------------------|
| Tan<br>2006   | Clinical Report of 90 Cases of Chronic Prostatitis Treated with Qianlian Suppository                  | Intervention not eligible |
| Wu<br>2006    | Study of 200 Cases of Chronic Prostatitis Treated with Qianlian Suppository                           | Outcome not eligible      |
| Pan<br>2005   | Observation on the Efficacy of Qianlian Suppository in the Treatment of Chronic Pelvic Pain Syndrome  | Outcome not eligible      |
| Feng<br>2005  | Clinical Analysis of 350 Cases of Chronic Prostatitis Treated with Qianlian Suppository               | Full text unavailable     |
| Li<br>2004    | Observation on the Efficacy of Qianlian Suppository in the Treatment of Chronic Prostatitis (CP)      | Intervention not eligible |
| Liu<br>2004   | Clinical Observation of 64 Cases of Chronic Prostatitis Treated with Qianlian Suppository             | Intervention not eligible |
| Zhang<br>2004 | Observation on the Efficacy of Qianlian Suppository in the Treatment of Chronic Prostatitis           | Population not eligible   |
| Guo<br>2004   | Observation on the Therapeutic Effect of Qianlian Suppository in the Treatment of Chronic Prostatitis | Outcome not eligible      |
| Wang<br>2004  | Report of 76 Cases of Chronic Prostatitis Treated with Qianlian Suppository                           | Outcome not eligible      |
| Zhang<br>2003 | Observation on the Efficacy of Qianlian Suppository in the Treatment of Chronic Prostatitis Syndrome  | Outcome not eligible      |
| Ci<br>2003    | Evaluation of the Therapeutic Effect of Qianlian Suppository in the Treatment of Chronic Prostatitis  | Intervention not eligible |
| Chu<br>2003   | Observation on the Efficacy of Qianlian Suppository in 78 Cases of Chronic Prostatitis                | Intervention not eligible |
| He<br>2003    | Clinical Observation of 89 Cases of Chronic Prostatitis Treated with Qianlian Suppository             | Outcome not eligible      |
| Yin<br>2002   | Observation on the Efficacy of Qianlian Suppository in the Treatment of Chronic Prostatitis           | Outcome not eligible      |
| Chen<br>2002  | Observation on the Efficacy of Qianlian Suppository in 76 Cases of Prostatodynia                      | Outcome not eligible      |
| Jia<br>2001   | Study on the Efficacy and Safety of Qianlian Suppository in the Treatment of Chronic Prostatitis      | Outcome not eligible      |
| Sun<br>2001   | Observation on the Efficacy of Qianlian Suppository in 29 Cases of Chronic Prostatitis Syndrome       | Outcome not eligible      |

|               |                                                                                                                     |                           |
|---------------|---------------------------------------------------------------------------------------------------------------------|---------------------------|
| Lv<br>1999    | Study of 60 Cases of Damp-Heat Type Chronic Prostatitis Treated with Qianlian Suppository                           | Outcome not eligible      |
| Zhang<br>2021 | Clinical Study of Shuangshi Tonglin Capsule Combined with Roxithromycin in the Treatment of Type IIIA Prostatitis   | Outcome not eligible      |
| Jin<br>2016   | Clinical Observation on the Treatment of Chronic Prostatitis with Shuangshi Tonglin Capsule                         | Intervention not eligible |
| Wang<br>2015  | Observation on the Clinical Efficacy of Shuangshi Tonglin Capsule in the Treatment of Chronic Bacterial Prostatitis | Outcome not eligible      |
